# Supplementary material for: Synthesis of conjugated bisallenes by cooperative Cu/Pd-catalysed borylallenylation of 2-trifluoromethyl-1,3-enynes
Source: Royal Society of Chemistry journal article supplement (doi:10.1039/d2cc03745a), 2022-01-01
Supplement: d2cc03745a1.pdf [file d2cc03745a1.pdf]

## *Supporting Information*

### **Synthesis of Conjugated Bisallenes by Cooperative Cu/Pd Catalysed Boryllenylation of 2-Trifluoromethyl-1,3-Enynes**

Shang-Hai Yu, Tian-Jun Gong\* and Yao Fu\*

|                                                     |           |
|-----------------------------------------------------|-----------|
| <b>I. General Information.....</b>                  | <b>1</b>  |
| <b>II. Optimization of Reaction Conditions.....</b> | <b>2</b>  |
| <b>III. General Experimental Procedures.....</b>    | <b>5</b>  |
| <b>IV. NMR Data and Spectra.....</b>                | <b>7</b>  |
| <b>V. References.....</b>                           | <b>81</b> |

# I. General Information

## A. Materials

All solvents were purchased and used without further purification. The following Chemicals were purchased and used as received: IMesCuCl (Sigma-Aldrich), IPrCuCl (Sigma-Aldrich), Pd(dppf)Cl<sub>2</sub> (J&K), Pd(dppe)Cl<sub>2</sub> (J&K), LiOMe (99%, J&K), LiO<sup>t</sup>Bu (99%, Acros), NaO<sup>t</sup>Bu (99%, Acros), dry THF (J&K). The 2-trifluoromethyl-1,3-enynes **1a-1x** were prepared according to standard procedures<sup>1-4</sup>.

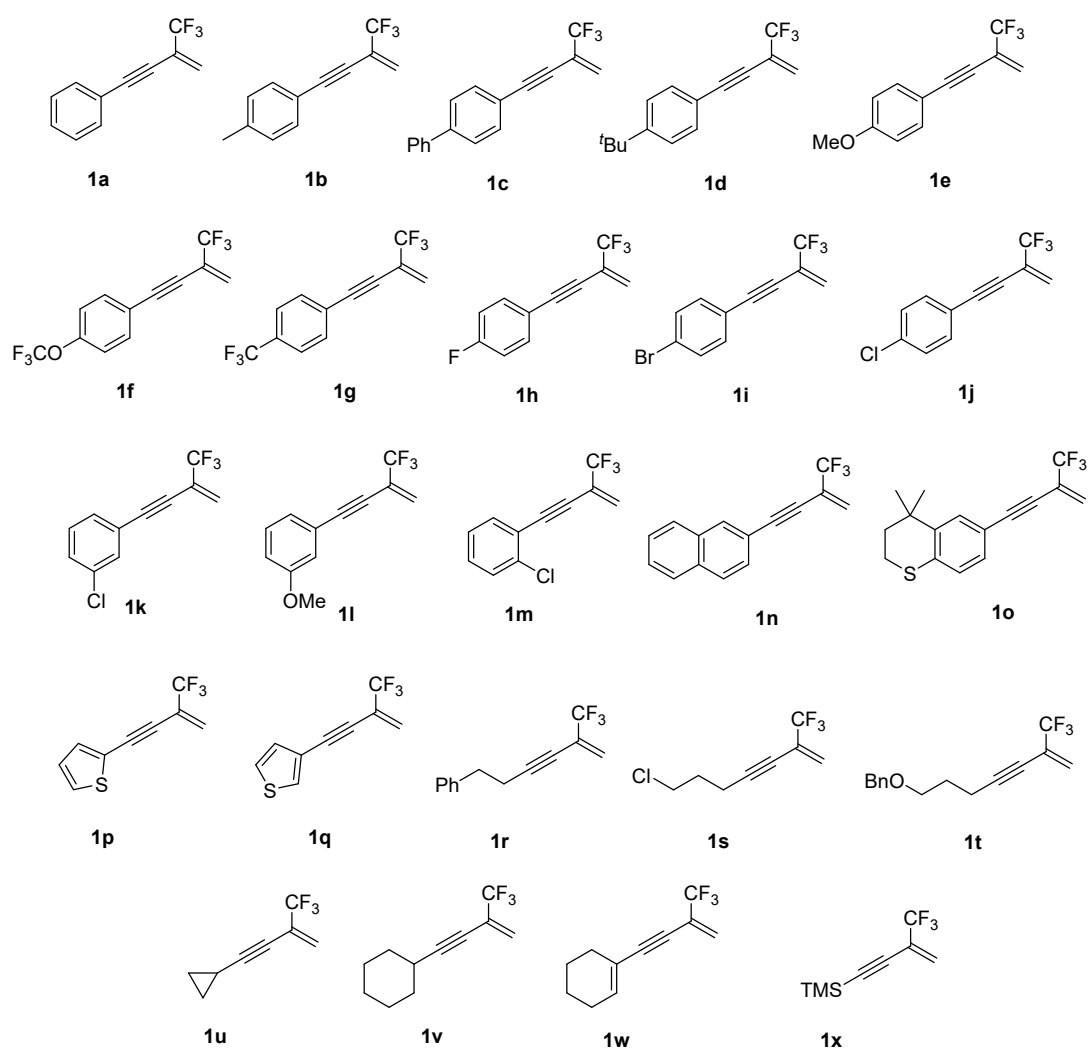

## B. Analytical Methods

<sup>1</sup>H-NMR, <sup>13</sup>C-NMR spectra were recorded on a Bruker Avance 400 spectrometer at ambient

temperature in CDCl<sub>3</sub> unless otherwise noted; Data for <sup>1</sup>H-NMR are reported as follows: chemical shift (δ ppm), multiplicity, integration, and coupling constant (Hz). Data for <sup>13</sup>C-NMR are reported in terms of chemical shift (δ ppm), multiplicity, and coupling constant (Hz). Gas chromatography (GC) analysis was acquired on a Shimadzu GC-2014 Series GC System equipped with a flame-ionization detector. GC-MS analysis was performed on Thermo Scientific AS 3000 Series GC-MS System. Electrospray ionization high-resolution mass spectra (ESI-HRMS) were recorded on a Acquity UPLC-Xevo G2 QToF mass spectrometer. HPLC analysis was performed on Waters-Breeze (2487 Dual Absorbance Detector and 1525 Binary HPLC Pump). Organic solutions were concentrated under reduced pressure on a Buchi rotary evaporator. Flash column chromatographic purification of products was accomplished using forced-flow chromatography on Silica Gel (200-300 mesh).

## II. General Experimental Procedures

**Table S1.** Screening of base<sup>a</sup>

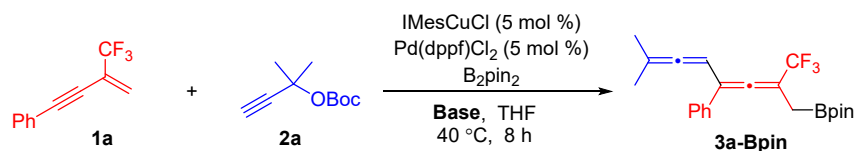

| entry    | Base                | conv. of <b>1a</b> (%) | yield (%) <sup>b</sup> |
|----------|---------------------|------------------------|------------------------|
| 1        | LiO <sup>t</sup> Bu | > 99                   | trace                  |
| 2        | NaO <sup>t</sup> Bu | > 99                   | 7                      |
| 3        | KO <sup>t</sup> Bu  | 78                     | trce                   |
| <b>4</b> | <b>LiOMe</b>        | <b>&gt; 99</b>         | <b>24</b>              |
| 5        | NaOMe               | 93                     | trace                  |

<sup>a</sup>Reaction conditions: **1a** (0.1 mmol), **2a** (0.2 mmol), B<sub>2</sub>pin<sub>2</sub> (0.15 mmol), Base (0.2 mmol), IMesCuCl (5 mol %), and Pd(dppf)Cl<sub>2</sub> (5 mol %) in THF (1.5 mL) at 40 °C for 8 h, the conversion ratio of **1a** was determined by GC. <sup>b</sup>Yield was determined by <sup>1</sup>H NMR using Ph<sub>3</sub>CH as internal standard.

**Table S2.** Screening of Cu catalyst<sup>a</sup>

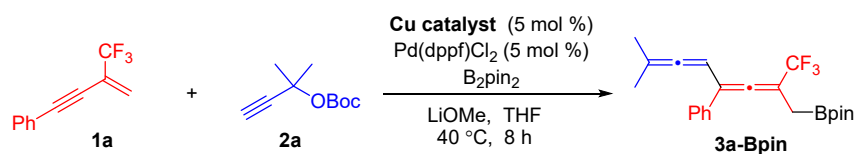

| entry | Cu catalyst           | conv. of <b>1a</b> (%) | yield (%) <sup>b</sup> |
|-------|-----------------------|------------------------|------------------------|
| 1     | CuCl/PCy <sub>3</sub> | > 99                   | 11                     |
| 2     | ICyCuCl               | 64                     | trace                  |
| 3     | SIMeCuCl              | > 99                   | 20                     |
| 4     | SIPrCuCl              | > 99                   | 45                     |
| 5     | <b>IPrCuCl</b>        | <b>&gt; 99</b>         | <b>47</b>              |

<sup>a</sup>Reaction conditions: **1a** (0.1 mmol), **2a** (0.2 mmol), B<sub>2</sub>pin<sub>2</sub> (0.15 mmol), LiOMe (0.2 mmol), Cu catalyst (5 mol %), and Pd(dppf)Cl<sub>2</sub> (5 mol %) in THF (1.5 mL) at 40 °C for 8 h, the conversion ratio of **1a** was determined by GC. <sup>b</sup>Yield was determined by <sup>1</sup>H NMR using Ph<sub>3</sub>CH as internal standard.

**Table S3.** Screening of Pd catalyst<sup>a</sup>

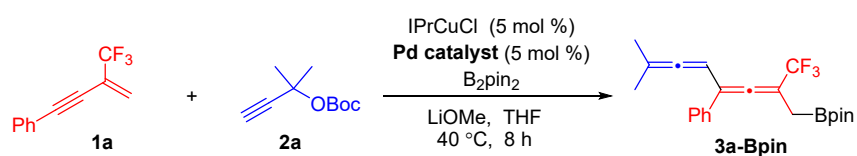

| entry | Pd catalyst                   | conv. of <b>1a</b> (%) | yield (%) <sup>b</sup> |
|-------|-------------------------------|------------------------|------------------------|
| 1     | Pd(dba) <sub>2</sub> /dppf    | > 99                   | 38                     |
| 2     | <b>Pd(dppe)Cl<sub>2</sub></b> | <b>87</b>              | <b>66</b>              |
| 3     | Pd(dppp)Cl <sub>2</sub>       | 92                     | 60                     |
| 4     | Pd(dppm)Cl <sub>2</sub>       | > 99                   | 51                     |
| 5     | Pd-XPhos-G3                   | > 99                   | trace                  |
| 6     | Pd-SPhos-G3                   | > 99                   | 18                     |

<sup>a</sup>Reaction conditions: **1a** (0.1 mmol), **2a** (0.2 mmol), B<sub>2</sub>pin<sub>2</sub> (0.15 mmol), LiOMe (0.2 mmol), IPrCuCl (5 mol %), and Pd catalyst (5 mol %) in THF (1.5 mL) at 40 °C for 8 h, the conversion ratio of **1a** was determined by GC. <sup>b</sup>Yield was determined by <sup>1</sup>H NMR using Ph<sub>3</sub>CH as internal standard.

**Table S4.** Screening of the loadings of Cu and Pd catalysts<sup>a</sup>

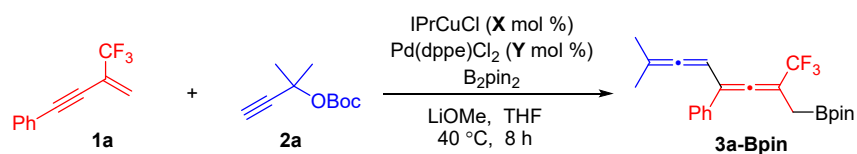

| entry          | X (mol %) | Y (mol %) | conv. of <b>1a</b> (%) | yield (%) <sup>b</sup> |
|----------------|-----------|-----------|------------------------|------------------------|
| 1              | 2         | 2         | 74                     | 51                     |
| 2              | 5         | 5         | 87                     | 66                     |
| 3 <sup>c</sup> | 5         | 5         | 95                     | 68                     |
| 4              | 5         | 10        | > 99                   | 72                     |
| 5              | 5         | 15        | > 99                   | 71                     |

<sup>a</sup>Reaction conditions: **1a** (0.1 mmol), **2a** (0.2 mmol), B<sub>2</sub>pin<sub>2</sub> (0.15 mmol), LiOMe (0.2 mmol), IPrCuCl (X mol %), and Pd(dppe)Cl<sub>2</sub> (Y mol %) in THF (1.5 mL) at 40 °C for 8 h, the conversion ratio of **1a** was determined by GC. <sup>b</sup>Yield was determined by <sup>1</sup>H NMR using Ph<sub>3</sub>CH as internal standard. <sup>c</sup>Reaction time: 12 h.

**Table S5.** Screening of the solvent<sup>a</sup>

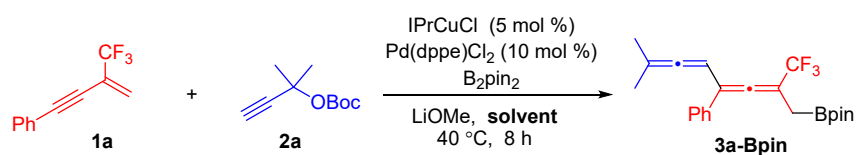

| entry          | solvent | conv. of <b>1a</b> (%) | yield (%) <sup>b</sup> |
|----------------|---------|------------------------|------------------------|
| 1 <sup>c</sup> | THF     | > 99                   | 57                     |
| 2              | 2-MeTHF | 33                     | trace                  |
| 3              | Toluene | 92                     | 14                     |
| 4              | Dioxane | > 99                   | 35                     |
| 5              | MeCN    | 41                     | trace                  |
| 6              | DME     | 55                     | trace                  |

<sup>a</sup>Reaction conditions: **1a** (0.1 mmol), **2a** (0.2 mmol), B<sub>2</sub>pin<sub>2</sub> (0.15 mmol), LiOMe (0.2 mmol), IPrCuCl (5 mol %), and Pd(dppe)Cl<sub>2</sub> (10 mol %) in solvent (1.5 mL) at 40 °C for 8 h, the conversion ratio of **1a** was determined by GC. <sup>b</sup>Yield was determined by <sup>1</sup>H NMR using Ph<sub>3</sub>CH as internal standard. <sup>c</sup>Reaction temperature: 60 °C.

**Table S6.** Screening of the types of substrates<sup>a</sup>

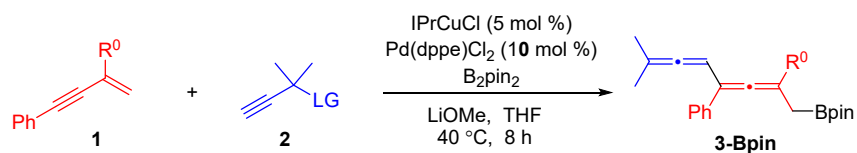

| entry | 1     | 2  | conv. of 1a (%) | yield (%) <sup>b</sup> |
|-------|-------|----|-----------------|------------------------|
| 1     | 1a    | 2b | 95              | 64                     |
| 2     | 1a    | 2c | 73              | 28                     |
| 3     | 1a    | 2d | 77              | 34                     |
| 4     | 1a    | 2e | > 99            | 43                     |
| 5     | 1a'   | 2a | 18              | trace                  |
| 6     | 1a''  | 2a | 92              | trace                  |
| 7     | 1a''' | 2a | 40              | trace                  |

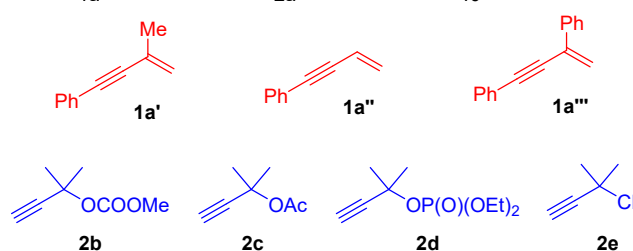

<sup>a</sup>Reaction conditions: **1** (0.1 mmol), **2** (0.2 mmol), B<sub>2</sub>pin<sub>2</sub> (0.15 mmol), LiOMe (0.2 mmol), IPrCuCl (5 mol %), and Pd(dppe)Cl<sub>2</sub> (10 mol %) in THF (1.5 mL) at 40 °C for 8 h, the conversion ratio of **1a** was determined by GC. <sup>b</sup>Yield was determined by <sup>1</sup>H NMR using Ph<sub>3</sub>CH as internal standard.

### III. General Experimental Procedures

#### A. General Experimental Procedures of Cu/Pd Catalysed Boryllenylation of 1,3-Enynes

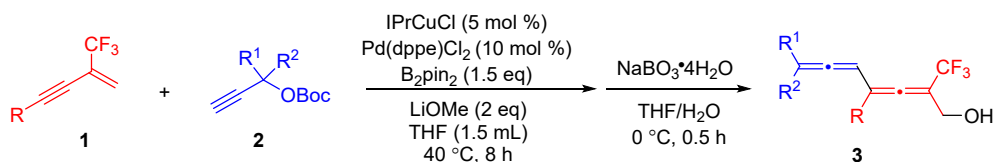

In the glove box, A 10 mL Schlenk tube equipped with a magnetic stirrer was charged with IPrCuCl (5 mol %), B<sub>2</sub>pin<sub>2</sub> (1.5 eq) and LiOMe (2 eq), then the mixture was stirred for 2 minutes in THF (0.5 mL) at room temperature. In a separate vial, Pd(dppe)Cl<sub>2</sub> (10 mol %), enyne **1** (0.1 mmol) and propargylic carbonate **2** (0.2 mmol) were stirred in THF (1mL) for 5 minutes at room temperature, this solution was finally

added to the reaction tube and heated at 40 °C (oil bath) for 8 h (while the aliphatic substituted enyne was used, corresponding solution was heated at 50 °C for 10 h). After this time, the reaction mixture was filtrated through a celite pad and concentrated under vacuum. Then the residue passed through a short column of deactivated silica gel to afford the product containing Bpin. Then a 10 mL vial with a stir bar was charged the product containing Bpin, 1.0 mL THF, 1.0 mL H<sub>2</sub>O and NaBO<sub>3</sub>·4H<sub>2</sub>O (4 eq) was added. After stirring at 0 °C for 0.5 h, the mixture was extracted with EtOAc, dried over Na<sub>2</sub>SO<sub>4</sub>. The combined organic phase was evaporated under vacuum, purified by flash column chromatography on silica gel to give the target product.

### Gram Scale Experiment for Synthesis of 3a-Bpin:

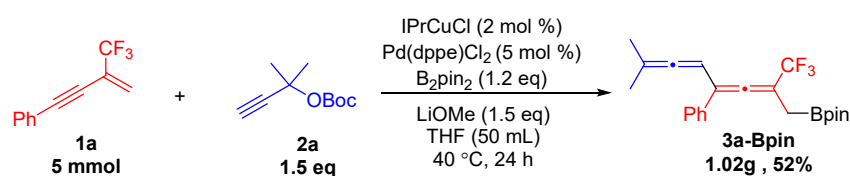

A 100 mL Schlenk tube equipped with a magnetic stirrer was charged with IMesCuCl (2 mol %), Pd(dppe)Cl<sub>2</sub> (5 mol %), B<sub>2</sub>pin<sub>2</sub> (1.2 eq) and LiOMe (1.5 eq). The tube was evacuated and backfilled with argon for three times, and then THF (50 mL) was added. After stirring for 5 min, the enyne **1a** (5 mmol) and propargylic carbonate **2a** (1.5 eq) were added by syringes under Ar. The reaction mixture was stirred and heated at 40 °C (oil bath) for 24 h. Then EtOAc and water were added and the layers were separated. The aqueous phase was extracted with EtOAc (x 2) and the combined organic layers were dried over Na<sub>2</sub>SO<sub>4</sub>, filtered, and concentrated. The residue was purified by flash column chromatography on deactivated silica gel to give the product.

### B. General Experimental Procedures of Iodination of Conjugated Bisallenenes

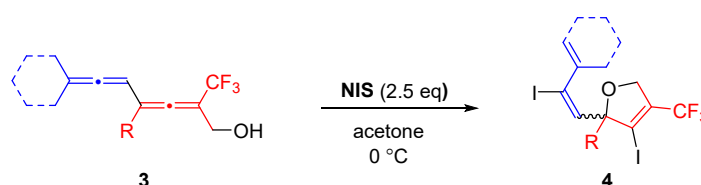

A 10 mL Schlenk tube equipped with magnetic stir bar was charged with NIS (2.5

eq) and 1.0 mL dry acetone, then cooled to 0 °C under argon atmosphere. The bisallene **3** (0.2 mmol) in 1.0 mL dry acetone was added. The mixture was stirred at 0 °C for one hour. Purification of the reaction mixture by flash chromatography (PE/EA 50:1) afforded the title compound **4**.

#### IV. NMR Data and Spectra

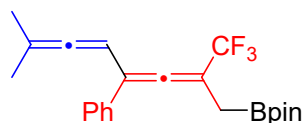

#### **4,4,5,5-tetramethyl-2-(7-methyl-4-phenyl-2-(trifluoromethyl)octa-2,3,5,6-tetraen-1-yl)-1,3,2-dioxaborolane (3a-Bpin)**

After isolated and purified procedure, this compound was obtained 1.02g (52% yield on the scale of 5 mmol) as colorless oil. (Petroleum ether: EtOAc = 15 : 1)

<sup>1</sup>H NMR (400 MHz, CDCl<sub>3</sub>) δ 7.55-7.37 (m, 2H), 7.35-7.20 (m, 3H), 5.83-5.65 (m, 1H), 1.83 (s, 1H), 1.69 (dd, *J* = 4.3, 3.2 Hz, 6H), 1.21 (d, *J* = 8.8 Hz, 12H).

<sup>13</sup>C NMR (101 MHz, CDCl<sub>3</sub>) δ 205.3 (q, *J* = 4.0 Hz), 205.1, 134.3, 128.1, 128.0, 127.8, 123.6 (q, *J* = 274.6 Hz), 111.0, 99.0, 97.3 (q, *J* = 35.0 Hz), 87.0, 83.8, 24.8, 24.7, 20.1, 19.9.

<sup>11</sup>B NMR (128 MHz, CDCl<sub>3</sub>) δ 32.98.

<sup>19</sup>F NMR (376 MHz, CDCl<sub>3</sub>) δ -65.30.

HRMS (ESI) calculated for C<sub>22</sub>H<sub>27</sub>BF<sub>3</sub>O<sub>2</sub><sup>+</sup> [M+H]<sup>+</sup> 391.2051; found 391.2062.



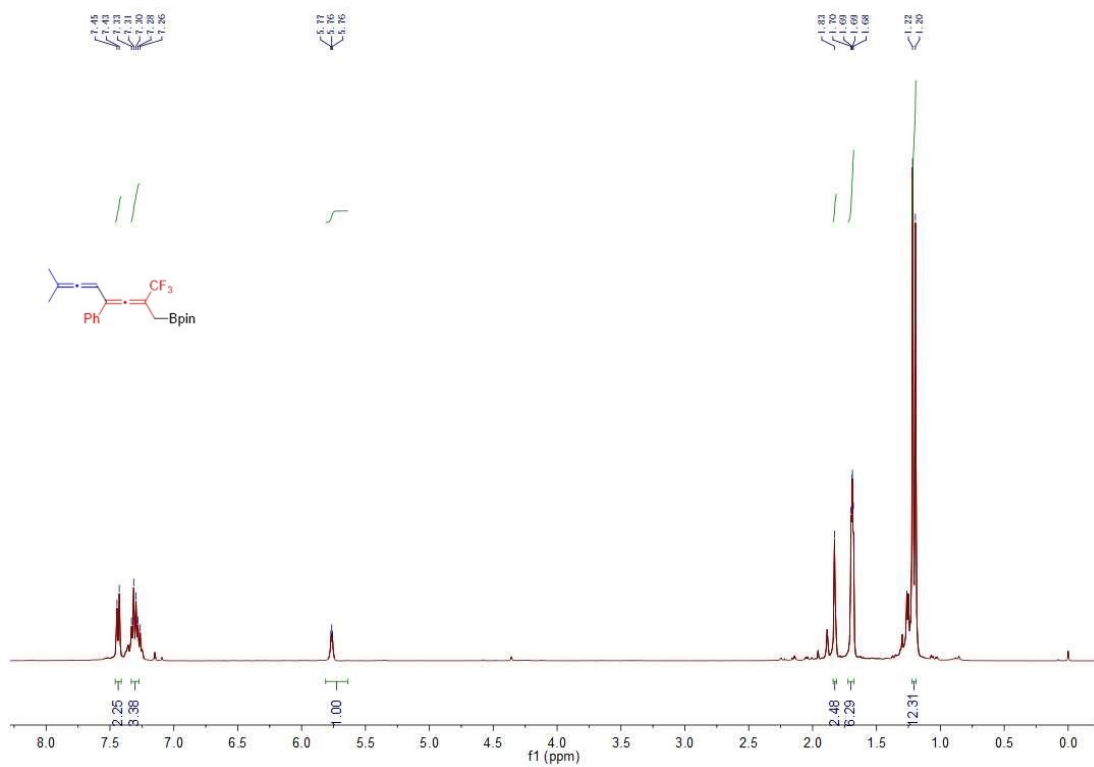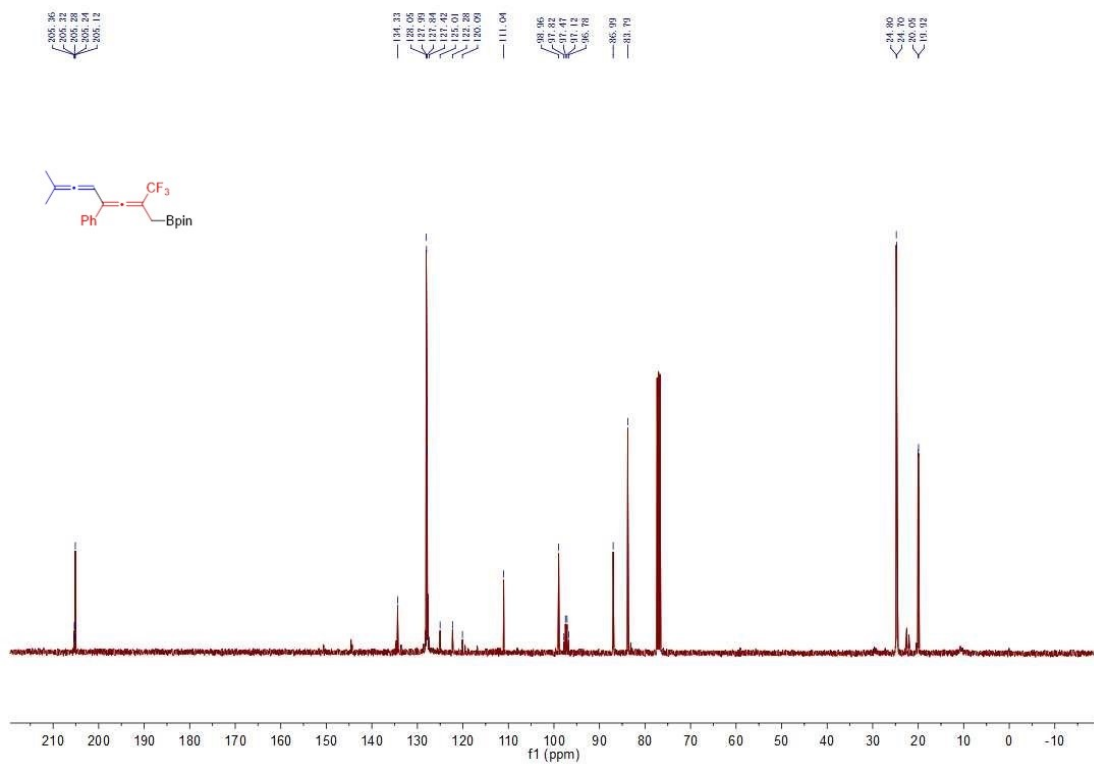

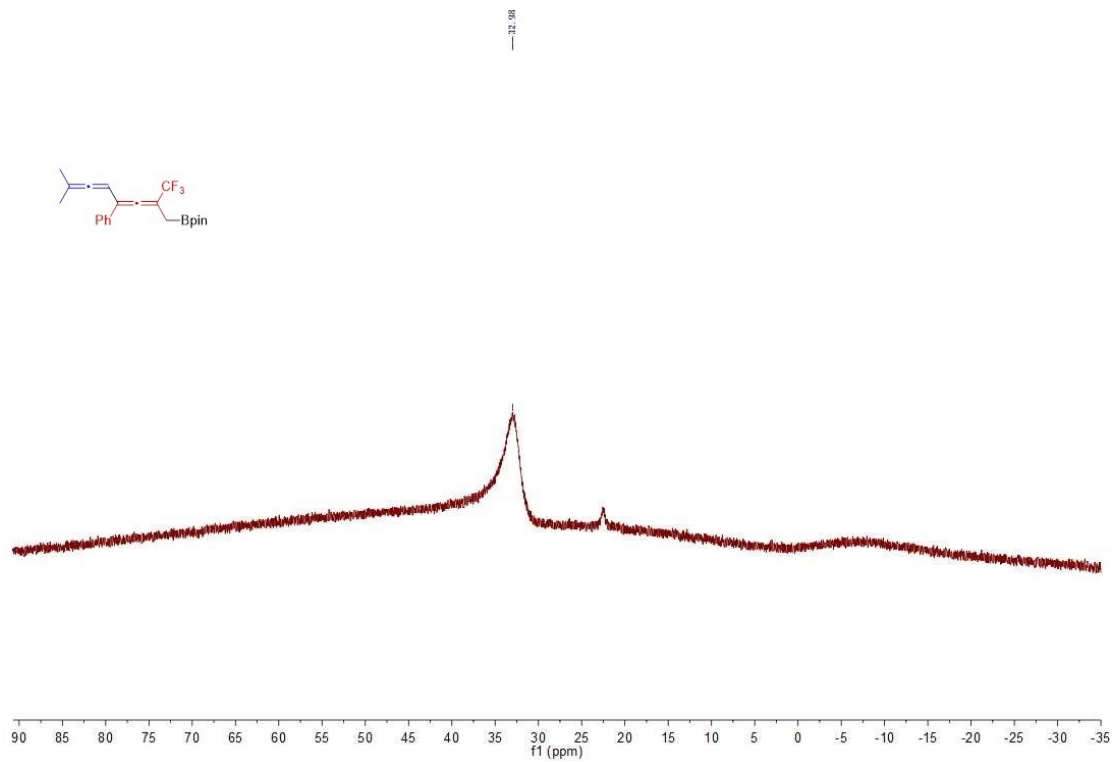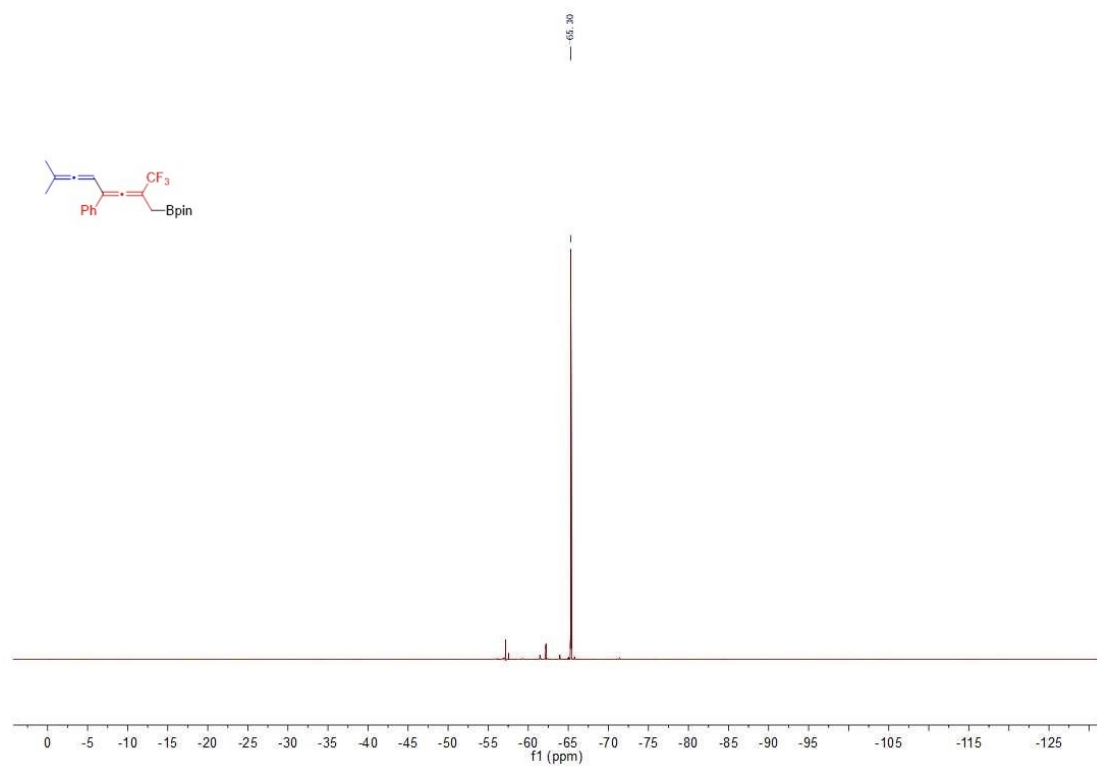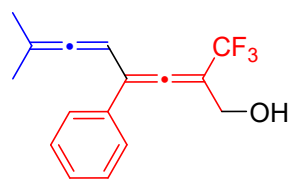

**7-methyl-4-phenyl-2-(trifluoromethyl)octa-2,3,5,6-tetraen-1-ol (3a)**

After isolated and purified procedure, this compound was obtained 18.2 mg (65% yield) as colorless oil. (Petroleum ether : EtOAc = 5 : 1)

$^1\text{H}$  NMR (400 MHz,  $\text{CDCl}_3$ )  $\delta$  7.51-7.27 (m, 5H), 5.77 (dt,  $J = 5.6, 2.8$  Hz, 1H), 4.35 (s, 2H), 1.69 (dd,  $J = 12.0, 2.8$  Hz, 6H).

$^{13}\text{C}$  NMR (101 MHz,  $\text{CDCl}_3$ )  $\delta$  205.6, 204.6 (q,  $J = 4.2$  Hz), 133.4, 128.5, 128.4, 127.9, 127.2, 123.0 (q,  $J = 274.9$  Hz), 114.1, 101.7 (q,  $J = 33.3$  Hz), 99.7, 86.5, 59.1, 19.9, 19.8.

$^{19}\text{F}$  NMR (376 MHz,  $\text{CDCl}_3$ )  $\delta$  -62.22.

HRMS (ESI) calculated for  $\text{C}_{16}\text{H}_{16}\text{F}_3\text{O}^+$   $[\text{M}+\text{H}]^+$  281.1148; found 281.1153.

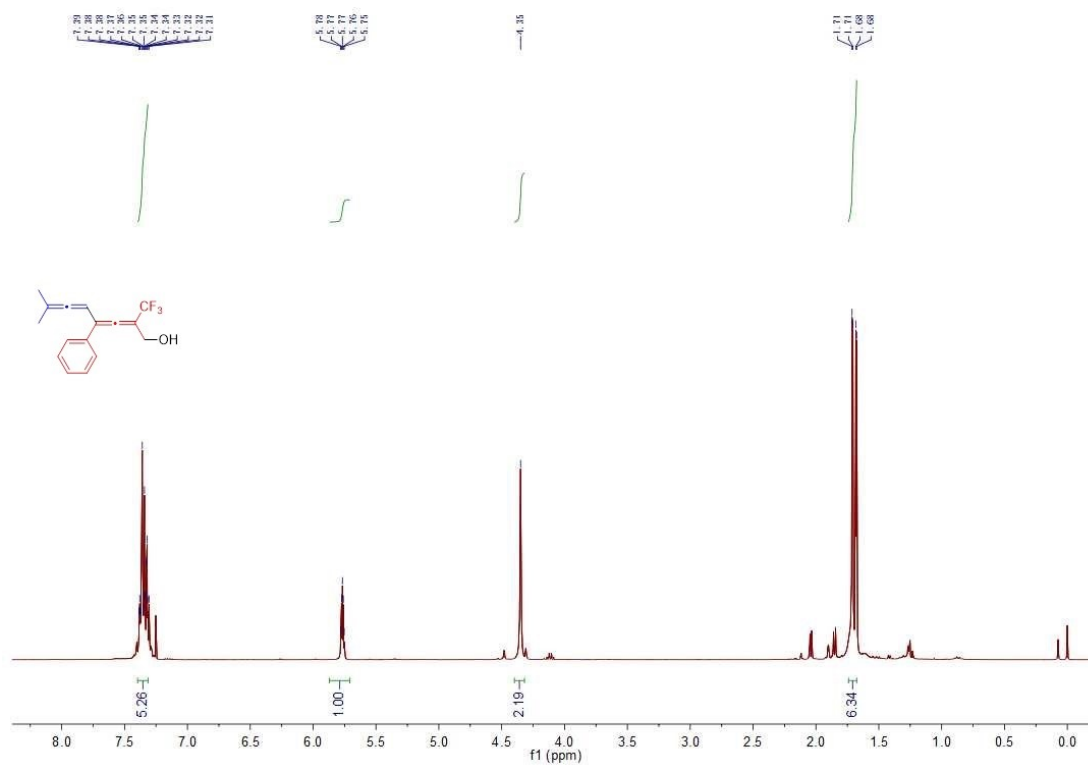

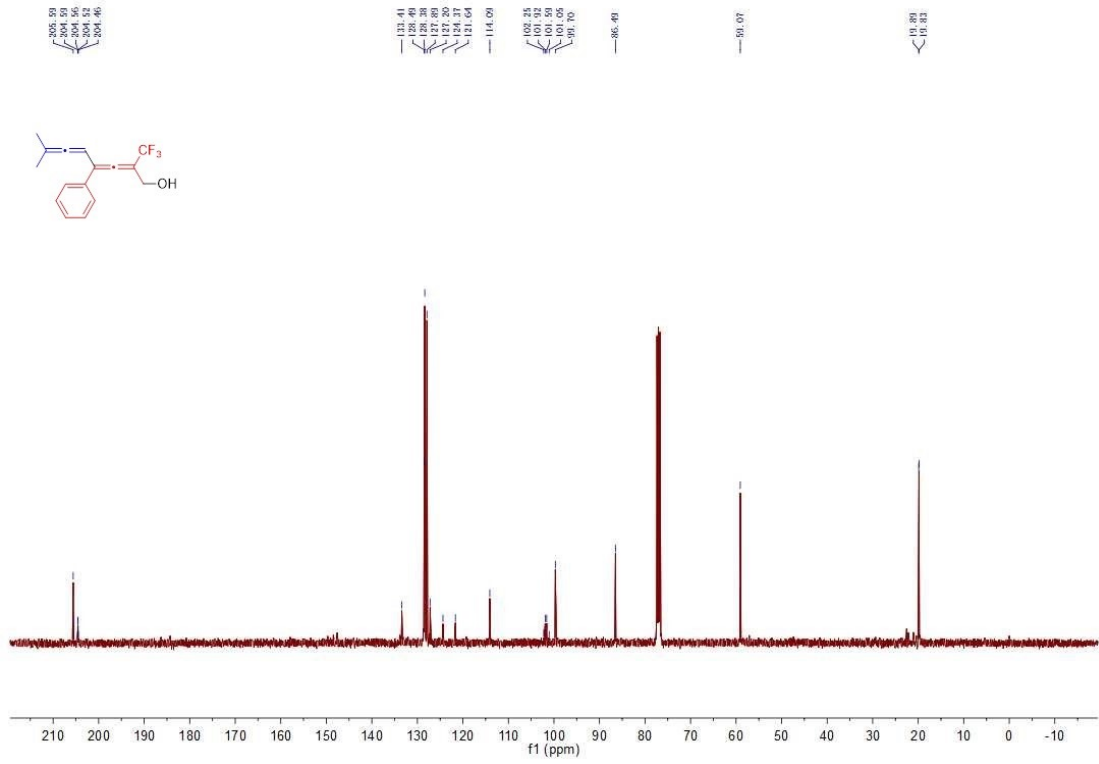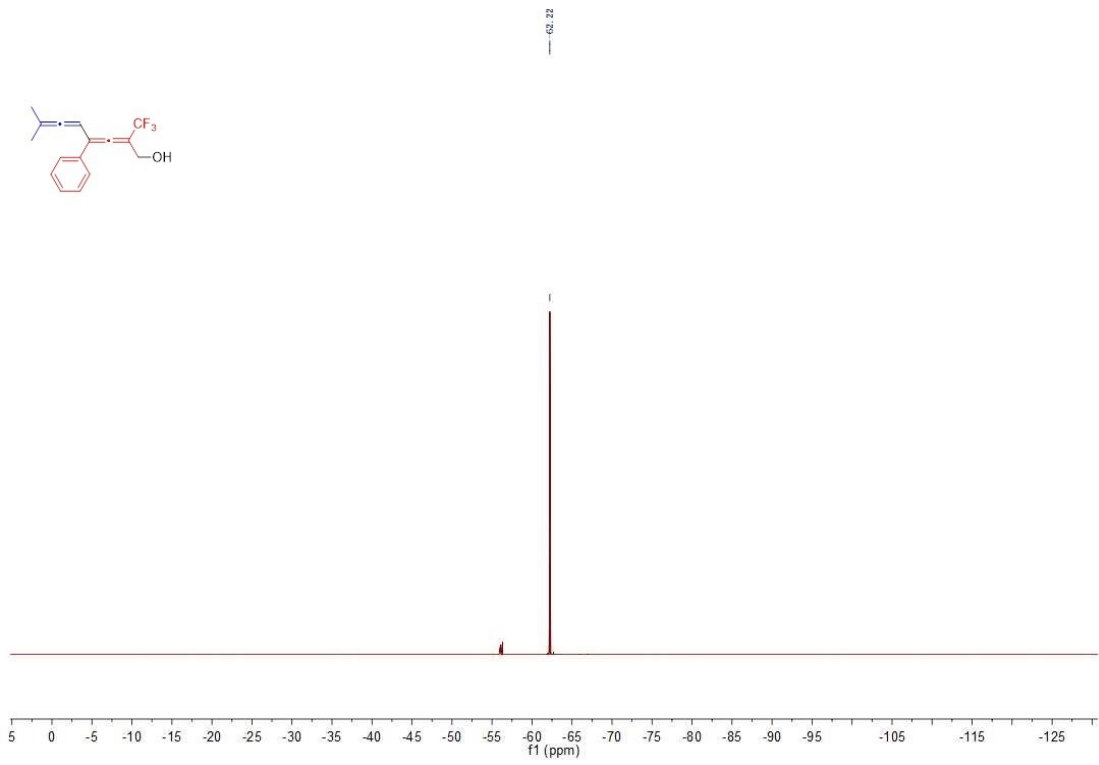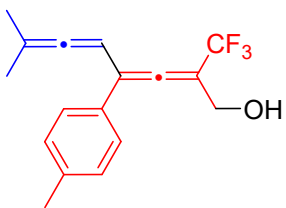

### 7-methyl-4-(p-tolyl)-2-(trifluoromethyl)octa-2,3,5,6-tetraen-1-ol (3b)

After isolated and purified procedure, this compound was obtained 20.0 mg (68% yield) as colorless oil. (Petroleum ether : EtOAc = 5 : 1)

$^1\text{H}$  NMR (400 MHz,  $\text{CDCl}_3$ )  $\delta$  7.26 (d,  $J = 5.3$  Hz, 2H), 7.15 (d,  $J = 8.0$  Hz, 2H), 5.75 (dt,  $J = 5.6, 2.8$  Hz, 1H), 4.35 (d,  $J = 5.8$  Hz, 2H), 2.36 (s, 3H), 1.70 (dd,  $J = 11.3, 2.8$  Hz, 6H).

$^{13}\text{C}$  NMR (101 MHz,  $\text{CDCl}_3$ )  $\delta$  205.5, 204.5 (q,  $J = 4.0$  Hz), 138.5, 130.3, 129.1, 127.7, 123.0 (q,  $J = 275.0$  Hz), 114.0, 101.6 (q,  $J = 33.2$  Hz), 99.6, 86.5, 59.1, 21.3, 19.9, 19.87.

$^{19}\text{F}$  NMR (376 MHz,  $\text{CDCl}_3$ )  $\delta$  -62.20.

HRMS (ESI) calculated for  $\text{C}_{17}\text{H}_{18}\text{F}_3\text{O}^+$   $[\text{M}+\text{H}]^+$  295.1304; found 295.1308.

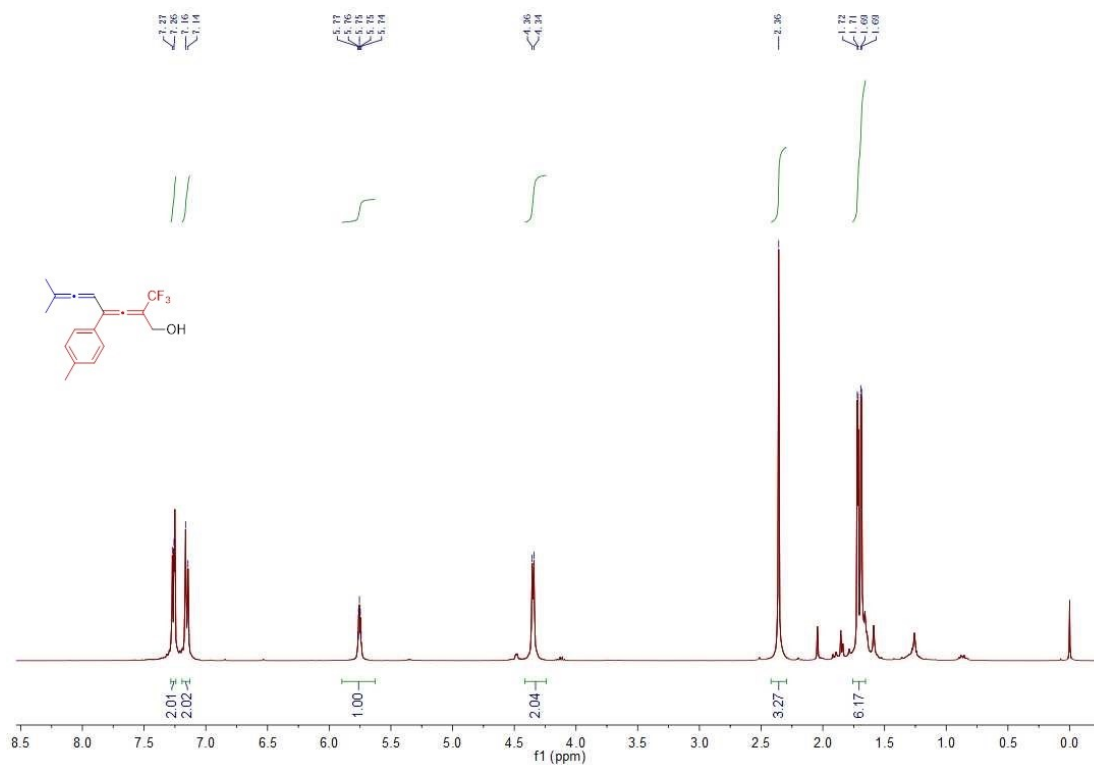

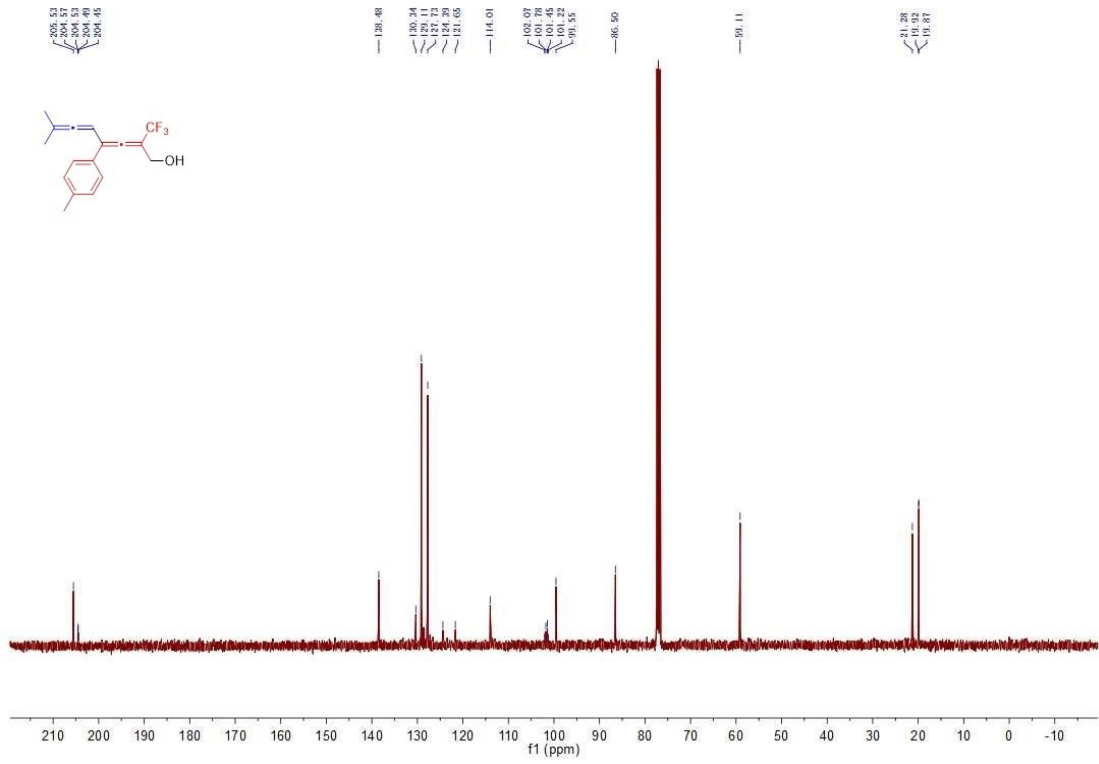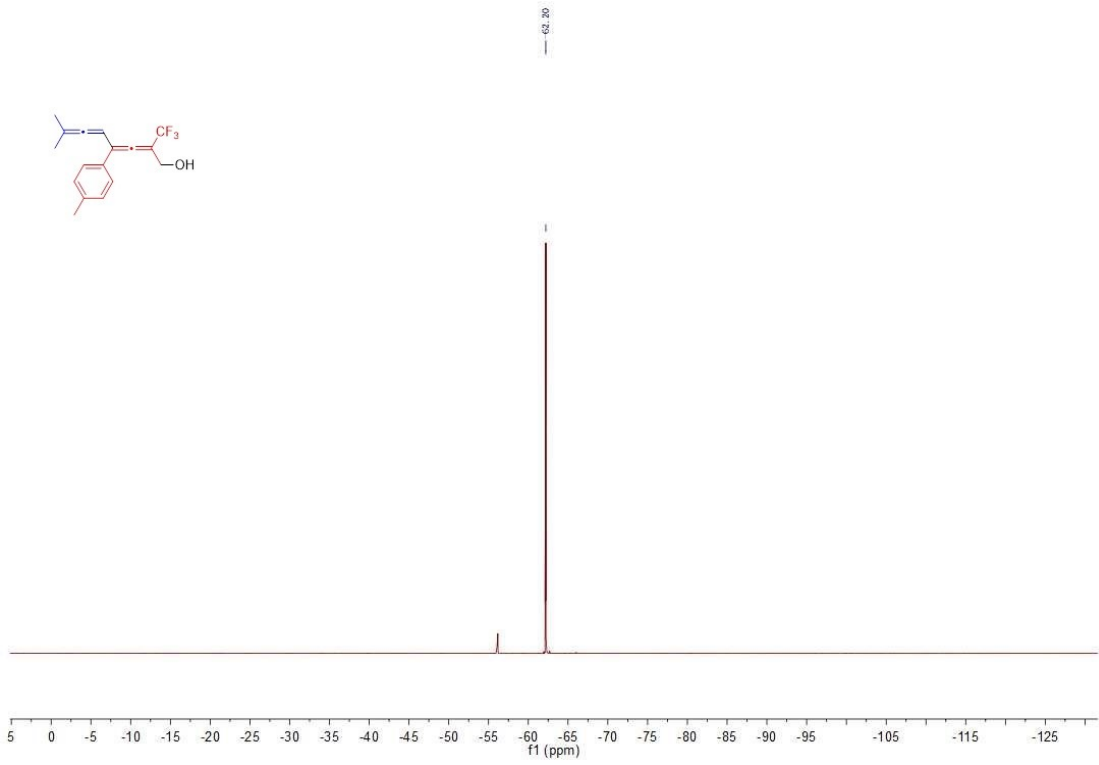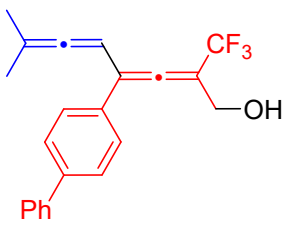

**4-([1,1'-biphenyl]-4-yl)-7-methyl-2-(trifluoromethyl)octa-2,3,5,6-tetraen-1-ol (3c)**

After isolated and purified procedure, this compound was obtained 25.3 mg (71% yield) as colorless oil. (Petroleum ether : EtOAc = 5 : 1)

$^1\text{H}$  NMR (400 MHz,  $\text{CDCl}_3$ )  $\delta$  7.60-7.58 (m, 4H), 7.47-7.44 (m, 4H), 7.43-7.34 (m, 1H), 5.80 (dt,  $J = 5.6, 2.8$  Hz, 1H), 4.38 (d,  $J = 5.2$  Hz, 2H), 1.73 (dd,  $J = 12.0, 2.8$  Hz, 6H).

$^{13}\text{C}$  NMR (101 MHz,  $\text{CDCl}_3$ )  $\delta$  205.6, 204.7 (q,  $J = 4.1$  Hz), 141.3, 140.5, 132.3, 128.9, 128.3, 127.6, 127.1, 127.1, 126.6, 123.0 (q,  $J = 275.2$  Hz), 113.8, 101.9 (d,  $J = 33.5$  Hz), 99.8, 86.4, 59.1, 20.0, 19.9.

$^{19}\text{F}$  NMR (376 MHz,  $\text{CDCl}_3$ )  $\delta$  -62.13.

HRMS (ESI) calculated for  $\text{C}_{22}\text{H}_{20}\text{F}_3\text{O}^+$   $[\text{M}+\text{H}]^+$  357.1461; found 357.1465.

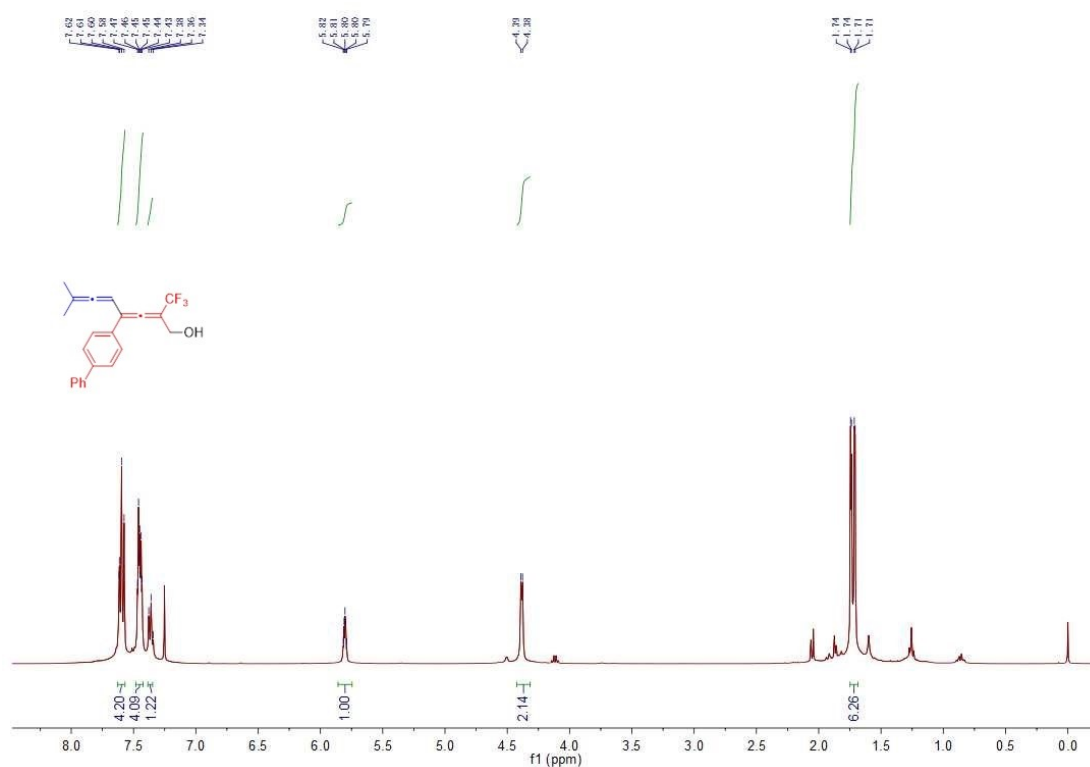

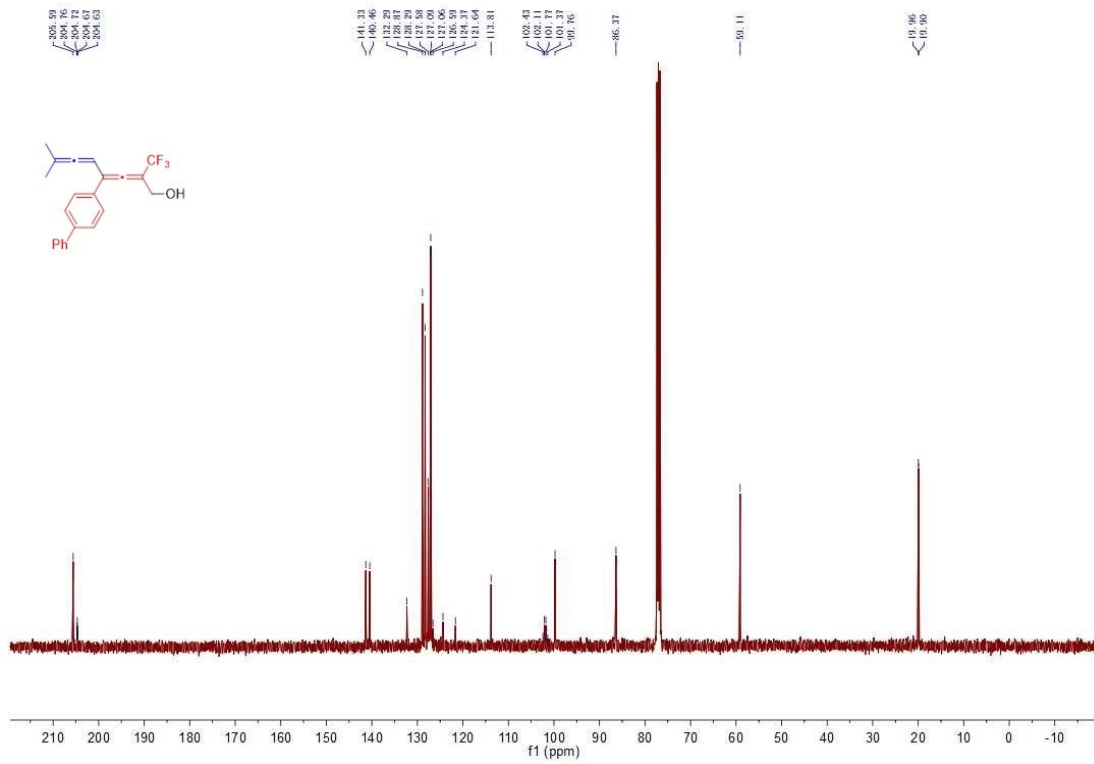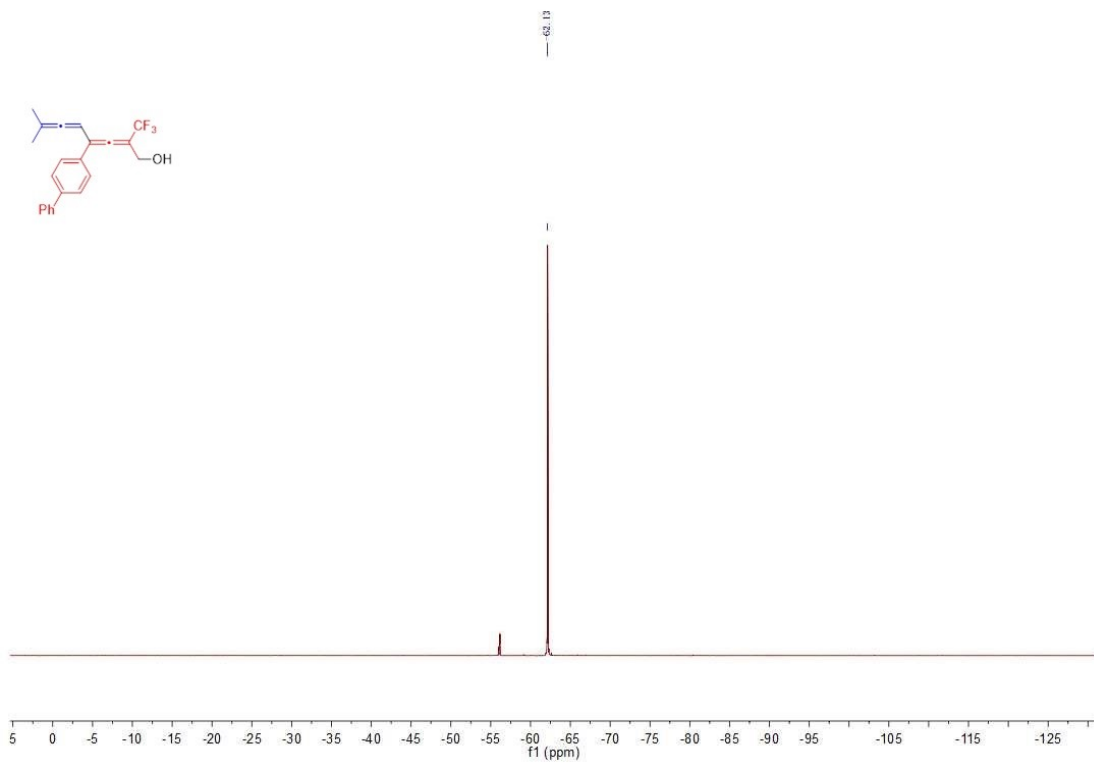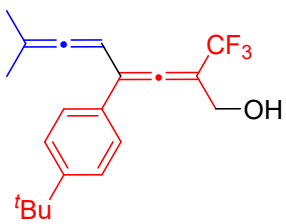



**4-(4-(tert-butyl)phenyl)-7-methyl-2-(trifluoromethyl)octa-2,3,5,6-tetraen-1-ol (3d)**

After isolated and purified procedure, this compound was obtained 23.5 mg (70% yield) as colorless oil. (Petroleum ether : EtOAc = 5 : 1)

$^1\text{H}$  NMR (400 MHz,  $\text{CDCl}_3$ )  $\delta$  7.35 (dd,  $J = 22.6, 8.5$  Hz, 4H), 5.75 (dt,  $J = 5.6, 2.8$  Hz, 1H), 4.35 (s, 2H), 1.72 (dd,  $J = 12.0, 2.8$  Hz, 6H), 1.32 (s, 3H).

$^{13}\text{C}$  NMR (101 MHz,  $\text{CDCl}_3$ )  $\delta$  205.5, 204.7 (q,  $J = 3.5$  Hz), 151.7, 130.2, 127.4, 125.4, 123.0 (q,  $J = 275.0$  Hz), 113.9, 101.8 (q,  $J = 33.4$  Hz), 99.4, 86.2, 59.1, 34.7, 31.3, 20.0, 19.9.

$^{19}\text{F}$  NMR (376 MHz,  $\text{CDCl}_3$ )  $\delta$  -62.18.

HRMS (ESI) calculated for  $\text{C}_{20}\text{H}_{24}\text{F}_3\text{O}^+$   $[\text{M}+\text{H}]^+$  337.1774; found 337.1781.

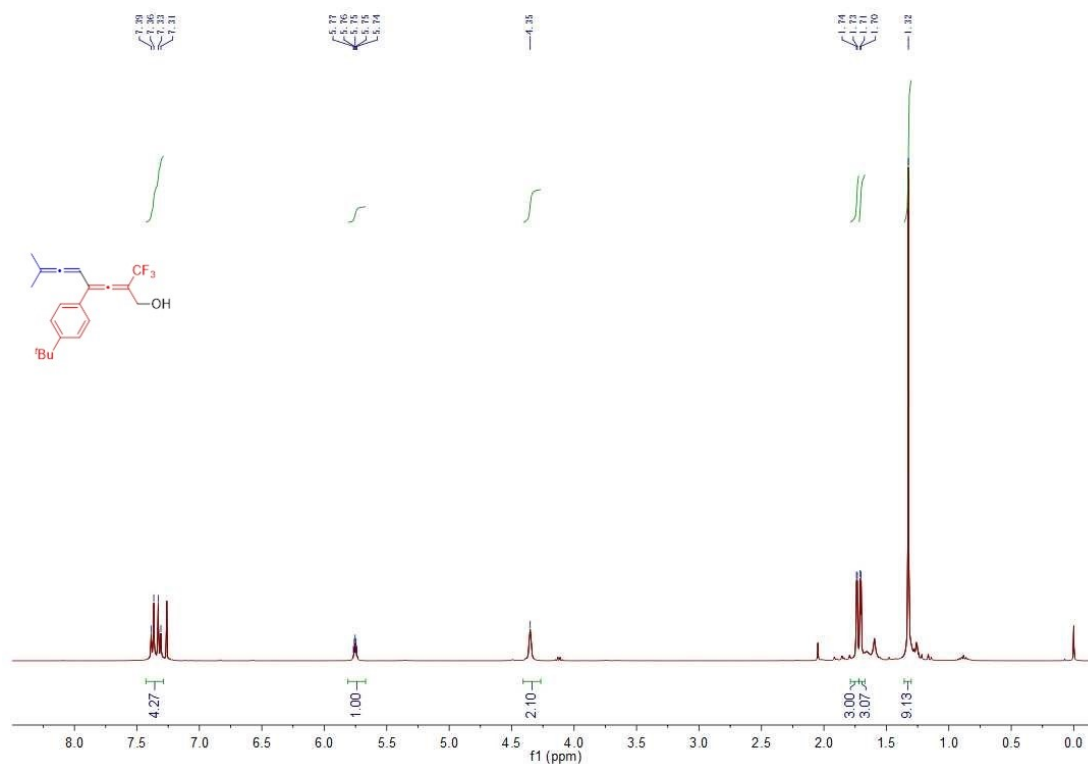

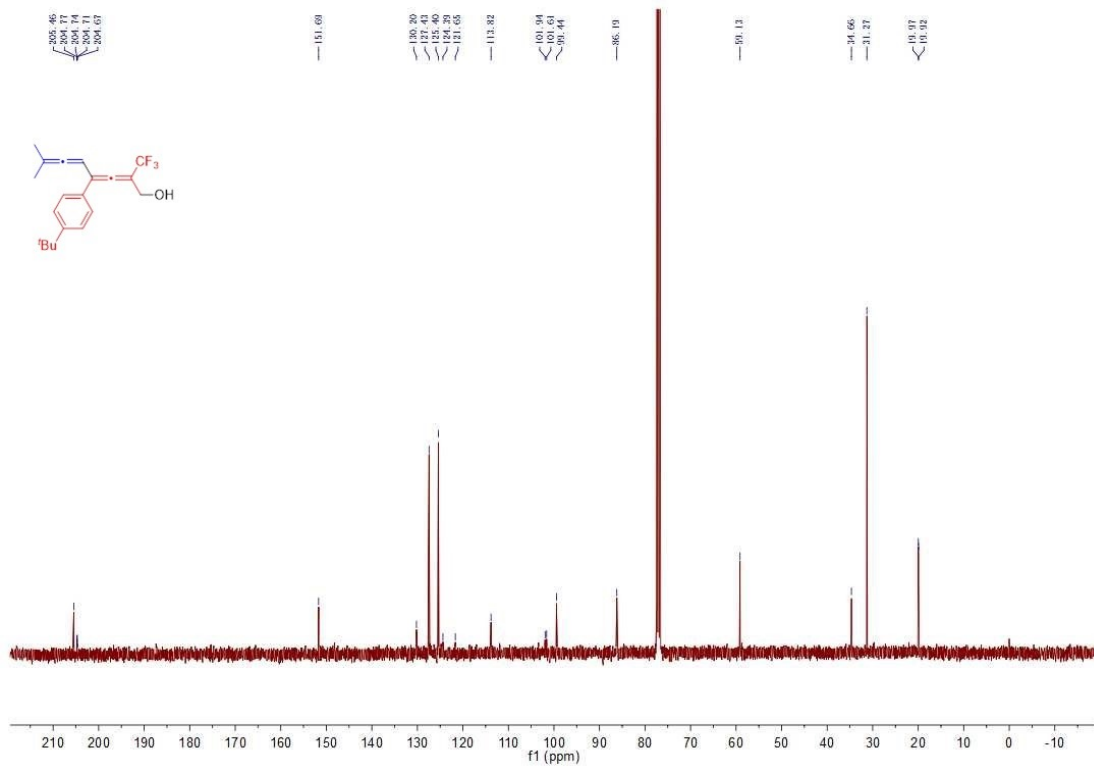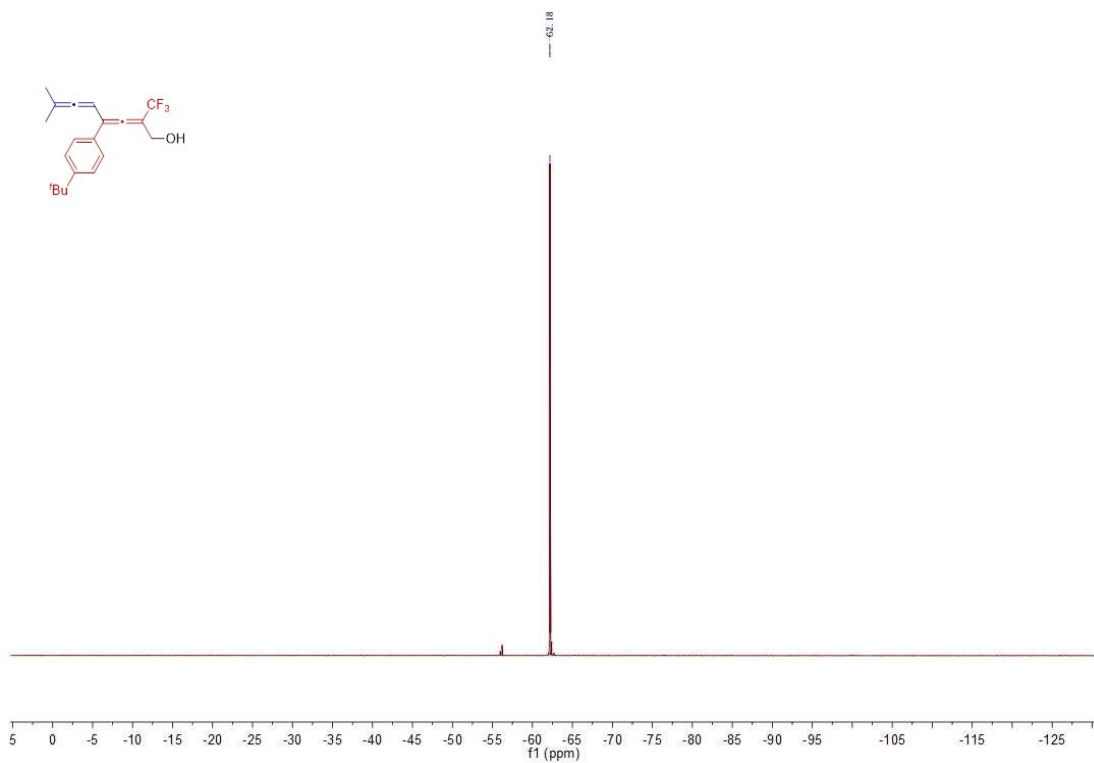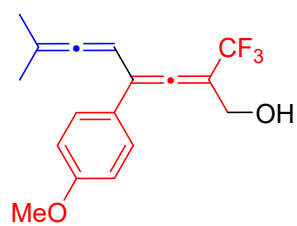

### 4-(4-methoxyphenyl)-7-methyl-2-(trifluoromethyl)octa-2,3,5,6-tetraen-1-ol (3e)

After isolated and purified procedure, this compound was obtained 17.9 mg (58% yield) as colorless oil. (Petroleum ether : EtOAc = 5 : 1)

$^1\text{H}$  NMR (400 MHz,  $\text{CDCl}_3$ )  $\delta$  7.38-7.17 (m, 2H), 6.90 (dd,  $J = 15.8, 8.8$  Hz, 2H), 5.75 (dt,  $J = 5.6, 2.7$  Hz, 1H), 4.35 (d,  $J = 6.3$  Hz, 2H), 3.82 (s, 3H), 1.71 (dd,  $J = 11.4, 2.8$  Hz, 6H).

$^{13}\text{C}$  NMR (101 MHz,  $\text{CDCl}_3$ )  $\delta$  205.5, 204.4 (q,  $J = 4.1$  Hz), 159.8, 129.1, 128.6, 125.4, 123.0 (q,  $J = 275.1$  Hz), 113.8, 101.6 (q,  $J = 33.1$  Hz), 99.6, 86.7, 59.1, 55.3, 20.0, 19.9.

$^{19}\text{F}$  NMR (376 MHz,  $\text{CDCl}_3$ )  $\delta$  -62.22.

HRMS (ESI) calculated for  $\text{C}_{17}\text{H}_{18}\text{F}_3\text{O}_2^+$   $[\text{M}+\text{H}]^+$  311.1253; found 311.1255.

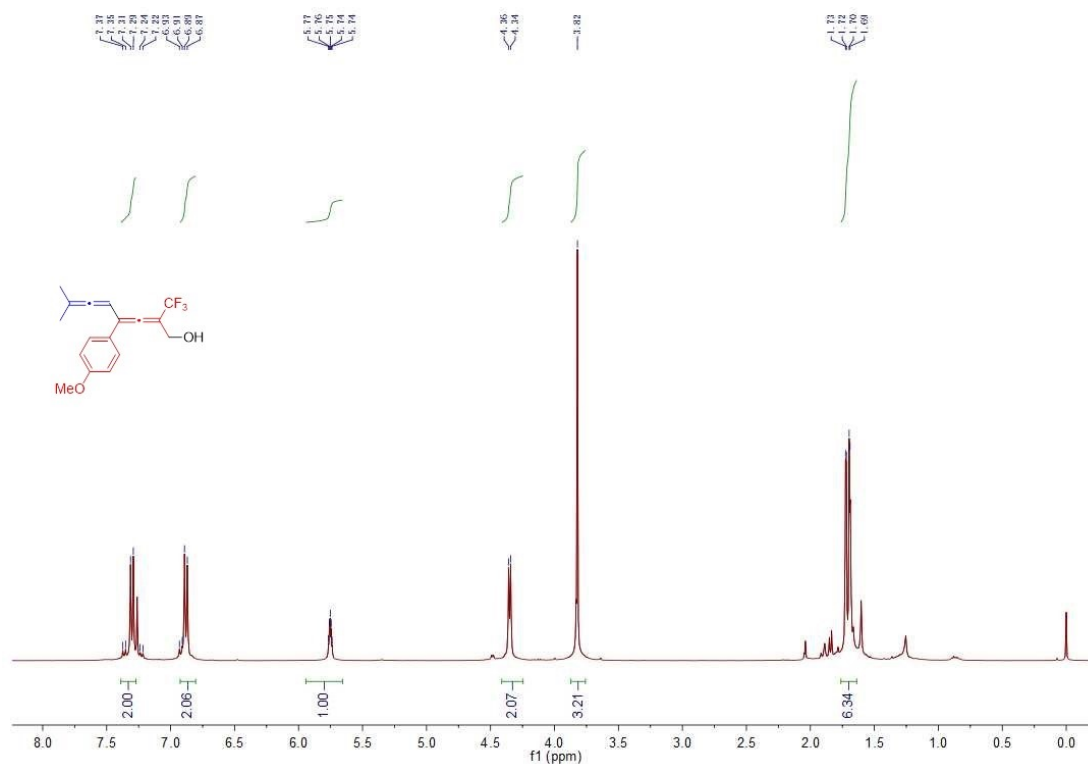

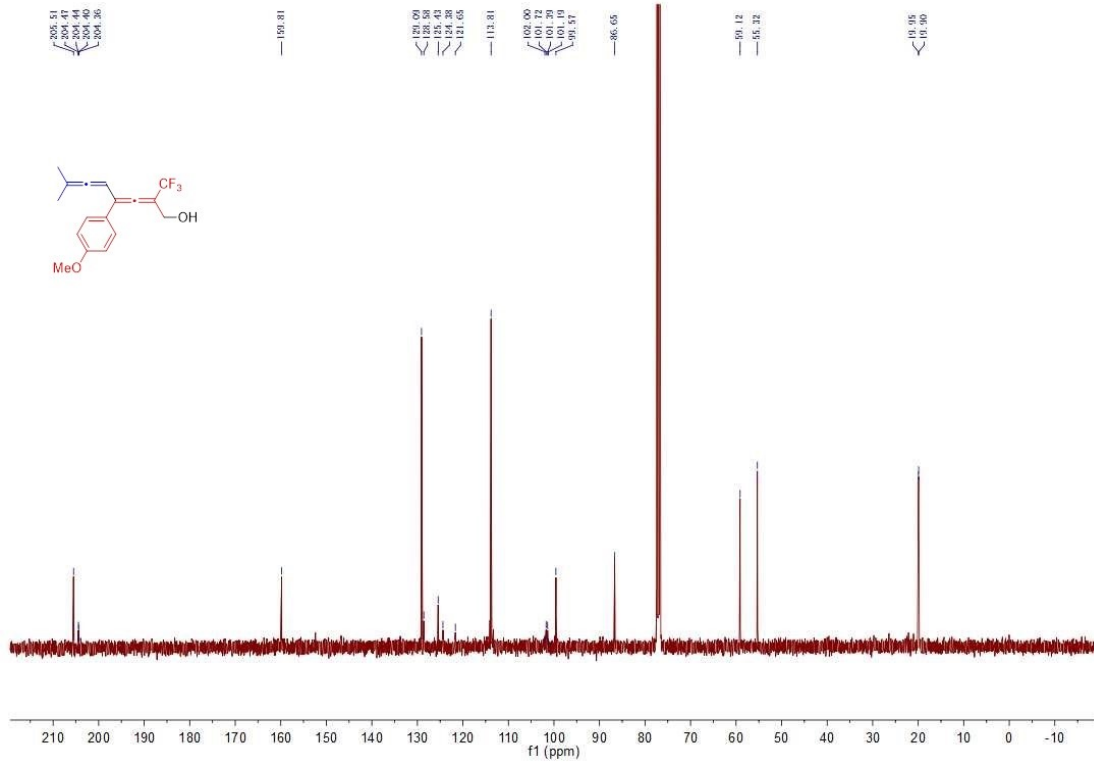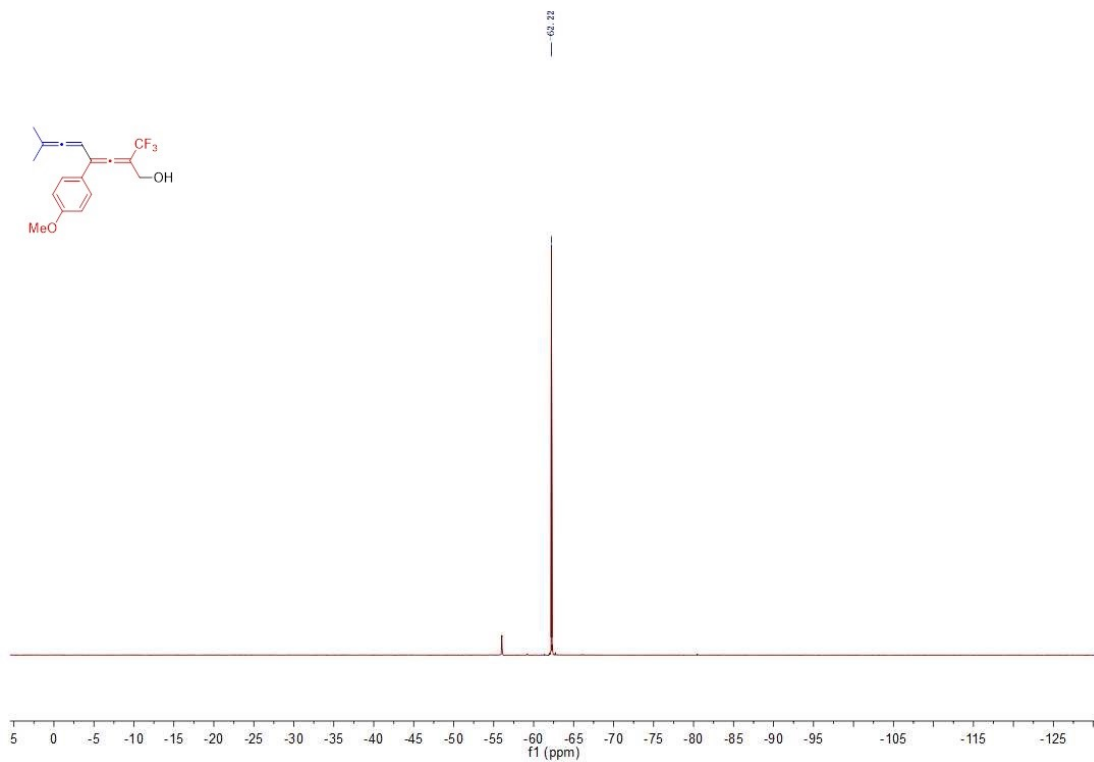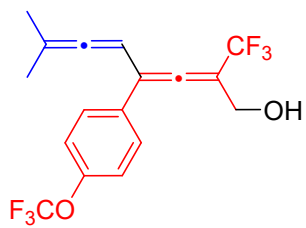

**7-methyl-4-(4-(trifluoromethoxy)phenyl)-2-(trifluoromethyl)octa-2,3,5,6-tetraen-1-ol (3f)**

After isolated and purified procedure, this compound was obtained 21.8 mg (60% yield) as colorless oil. (Petroleum ether : EtOAc = 5 : 1)

$^1\text{H}$  NMR (400 MHz,  $\text{CDCl}_3$ )  $\delta$  7.45-7.35 (m, 2H), 7.20 (d,  $J = 8.1$  Hz, 2H), 5.77 (dt,  $J = 5.7, 2.8$  Hz, 1H), 4.37 (d,  $J = 6.2$  Hz, 2H), 1.70 (dd,  $J = 11.9, 2.9$  Hz, 6H).

$^{13}\text{C}$  NMR (101 MHz,  $\text{CDCl}_3$ )  $\delta$  205.6, 204.42 (q,  $J = 4.1$  Hz), 149.2, 132.2, 129.4, 122.9 (q,  $J = 275.1$  Hz), 120.8, 120.4 (q,  $J = 257.5$  Hz), 113.1, 102.1 (q,  $J = 33.4$  Hz), 100.2, 86.5, 59.0, 19.9, 19.8.

$^{19}\text{F}$  NMR (376 MHz,  $\text{CDCl}_3$ )  $\delta$  -57.81, -62.25.

HRMS (ESI) calculated for  $\text{C}_{17}\text{H}_{15}\text{F}_6\text{O}_2^+$   $[\text{M}+\text{H}]^+$  365.0971; found 365.0974.

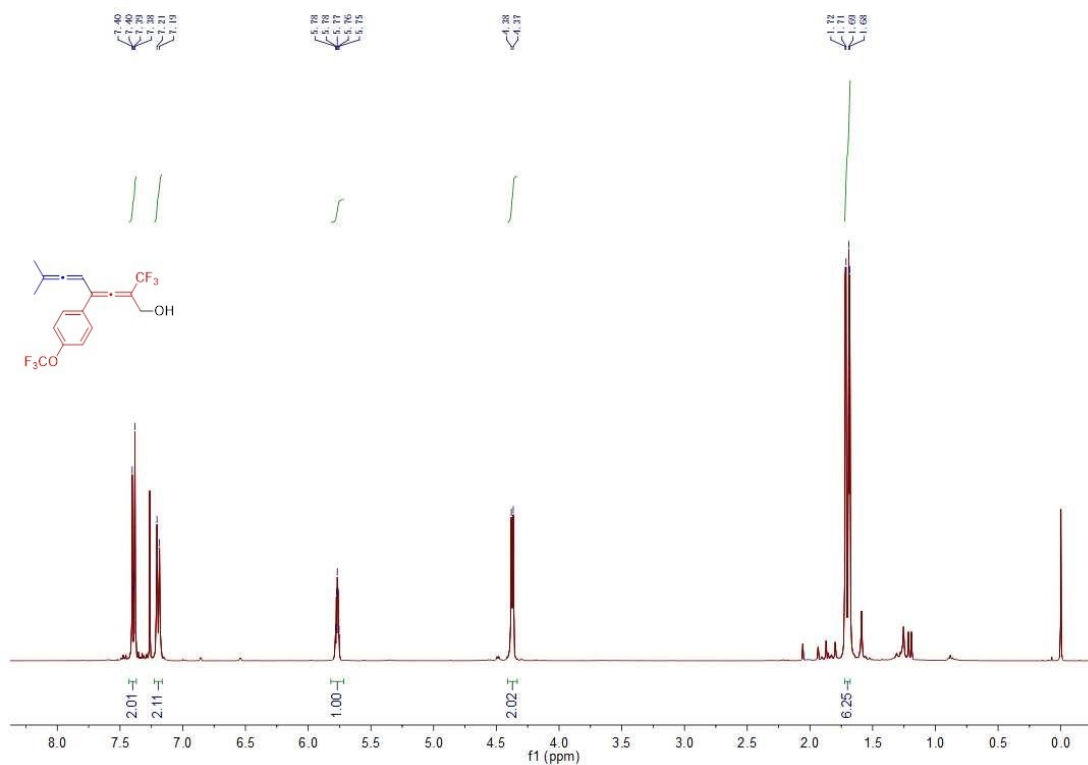

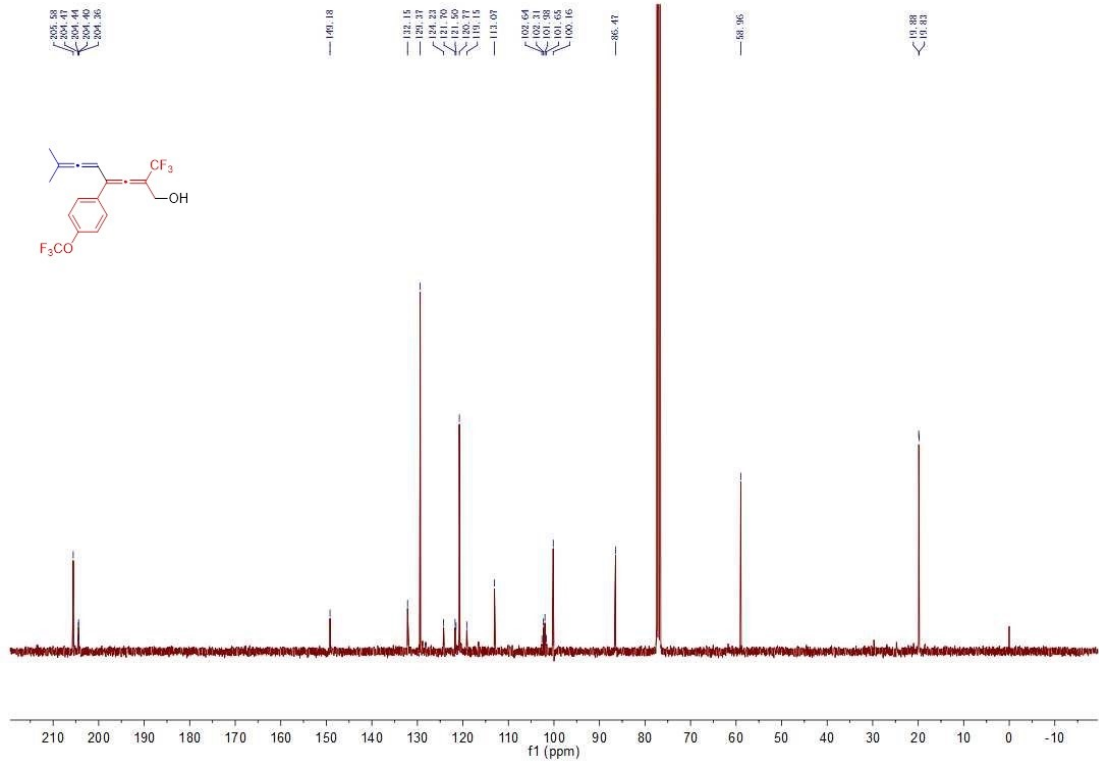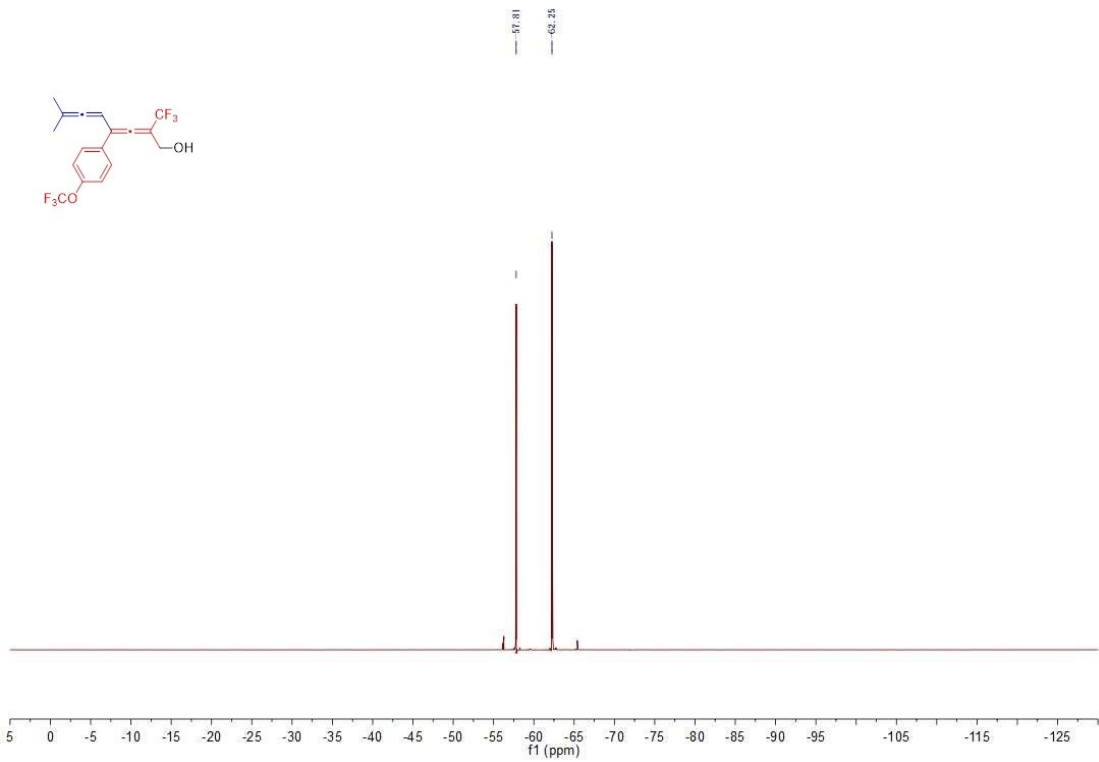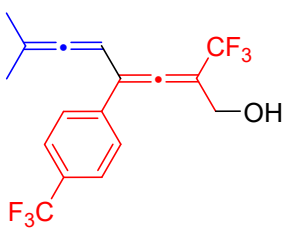

**7-methyl-2-(trifluoromethyl)-4-(4-(trifluoromethyl)phenyl)octa-2,3,5,6-tetraen-1-ol (3g)**

After isolated and purified procedure, this compound was obtained 19.1 mg (55% yield) as colorless oil. (Petroleum ether : EtOAc = 5 : 1)

$^1\text{H}$  NMR (400 MHz,  $\text{CDCl}_3$ )  $\delta$  7.61 (d,  $J = 8.2$  Hz, 2H), 7.48 (d,  $J = 8.2$  Hz, 2H), 5.79 (dt,  $J = 5.7, 2.8$  Hz, 1H), 4.38 (d,  $J = 4.1$  Hz, 2H), 1.70 (dd,  $J = 11.5, 2.8$  Hz, 6H).

$^{13}\text{C}$  NMR (101 MHz,  $\text{CDCl}_3$ )  $\delta$  205.6, 204.6 (d,  $J = 4.4$  Hz), 137.4, 130.5 (q,  $J = 32.7$  Hz), 128.3, 125.3 (q,  $J = 3.8$  Hz), 122.8 (q,  $J = 275.0$  Hz), 122.7, 113.2, 102.4 (q,  $J = 33.3$  Hz), 100.3, 86.3, 58.9, 19.9, 19.8.

$^{19}\text{F}$  NMR (376 MHz,  $\text{CDCl}_3$ )  $\delta$  -62.22, -62.61.

HRMS (ESI) calculated for  $\text{C}_{17}\text{H}_{15}\text{F}_6\text{O}^+$   $[\text{M}+\text{H}]^+$  349.1022; found 349.1024.

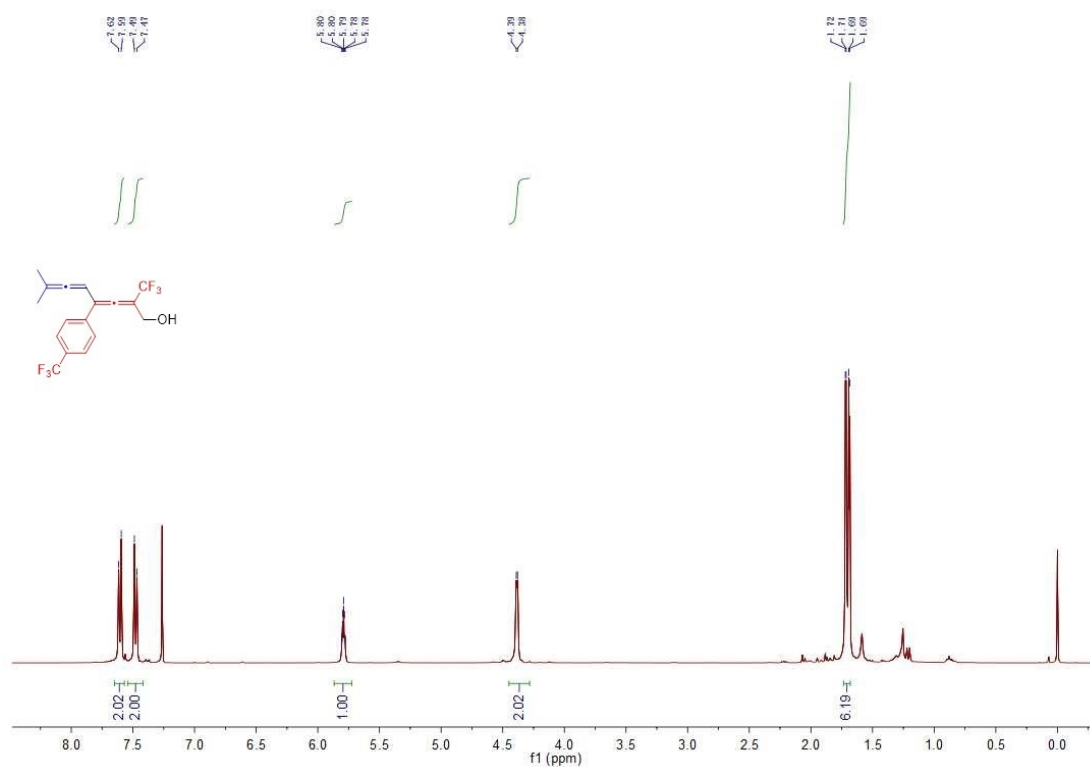

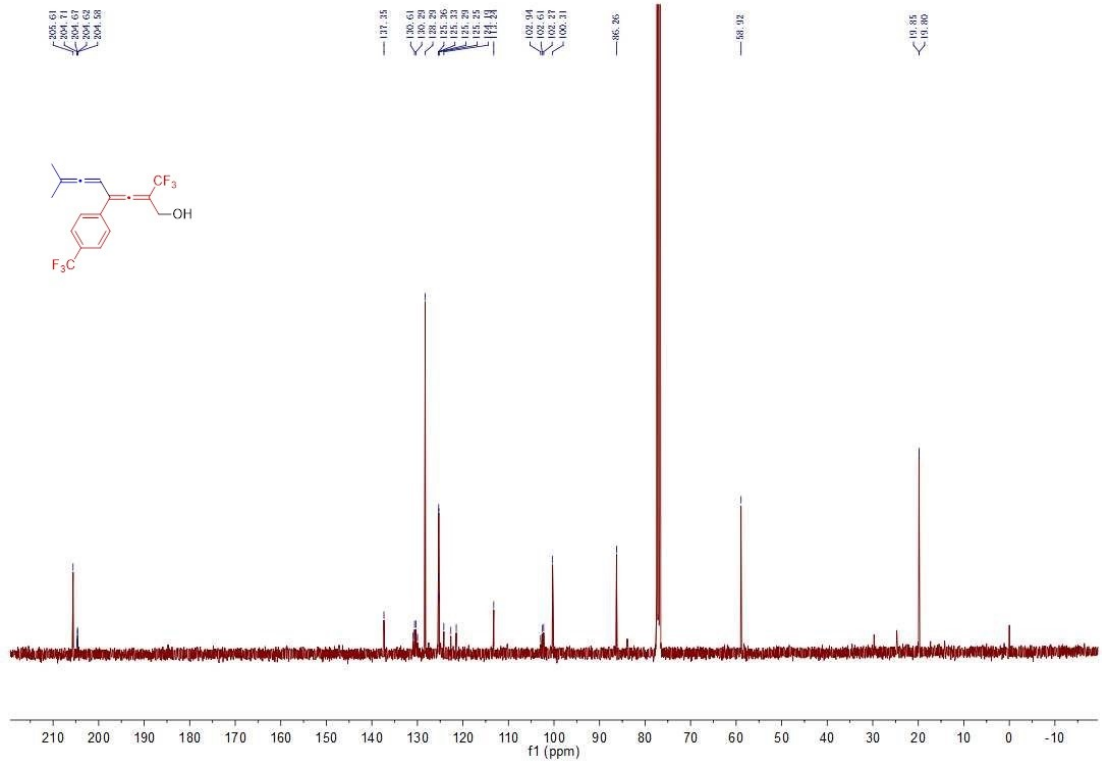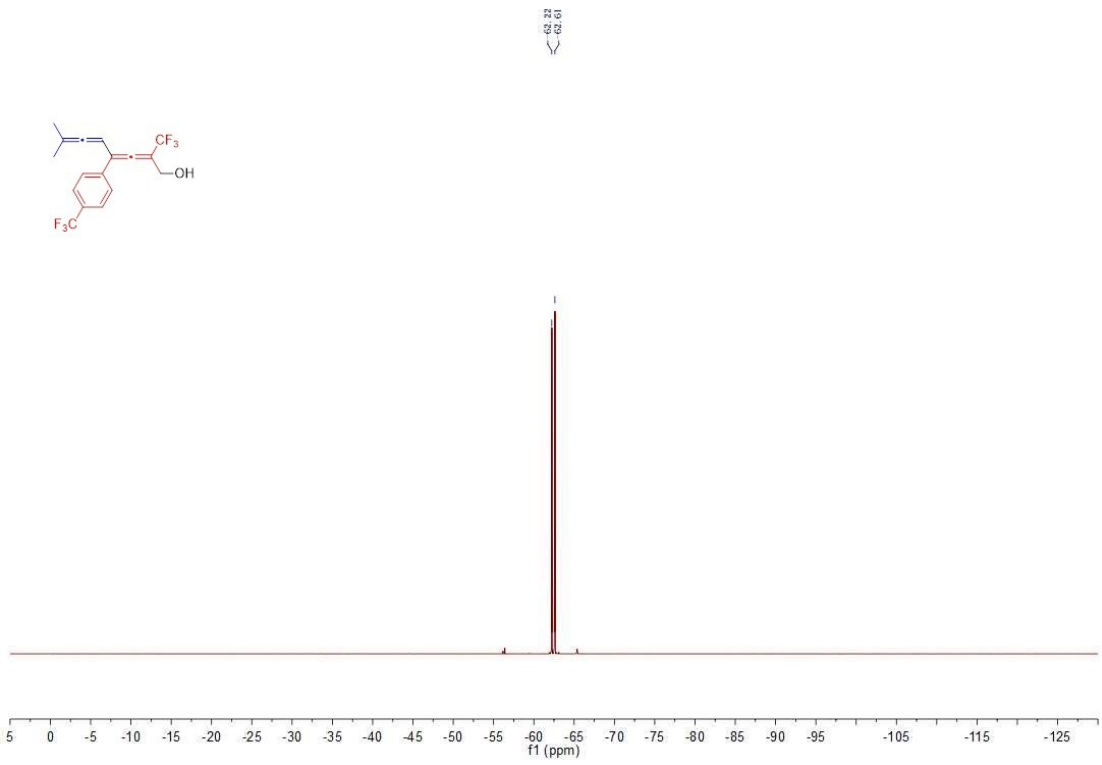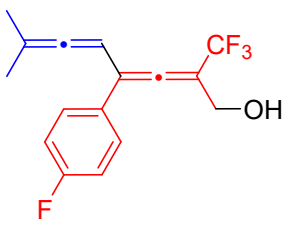



### 4-(4-fluorophenyl)-7-methyl-2-(trifluoromethyl)octa-2,3,5,6-tetraen-1-ol (3h)

After isolated and purified procedure, this compound was obtained 17.9 mg (60% yield) as colorless oil. (Petroleum ether : EtOAc = 5 : 1)

$^1\text{H}$  NMR (400 MHz,  $\text{CDCl}_3$ )  $\delta$  7.41-7.30 (m, 2H), 7.04 (t,  $J = 8.6$  Hz, 2H), 5.76 (dt,  $J = 5.6, 2.7$  Hz, 1H), 4.36 (d,  $J = 4.5$  Hz, 2H), 1.69 (dd,  $J = 11.6, 2.8$  Hz, 6H).

$^{13}\text{C}$  NMR (101 MHz,  $\text{CDCl}_3$ )  $\delta$  205.6, 204.3 (q,  $J = 3.9$  Hz), 162.8 (d,  $J = 248.0$  Hz), 129.7 (d,  $J = 8.2$  Hz), 129.4, 122.9 (q,  $J = 275.0$  Hz), 115.4 (d,  $J = 21.7$  Hz), 113.3, 101.8 (q,  $J = 33.3$  Hz), 100.0, 86.7, 59.0, 19.9, 19.8.

$^{19}\text{F}$  NMR (376 MHz,  $\text{CDCl}_3$ )  $\delta$  -62.25, -113.10.

HRMS (ESI) calculated for  $\text{C}_{16}\text{H}_{15}\text{F}_4\text{O}^+$   $[\text{M}+\text{H}]^+$  299.1054; found 299.1050.

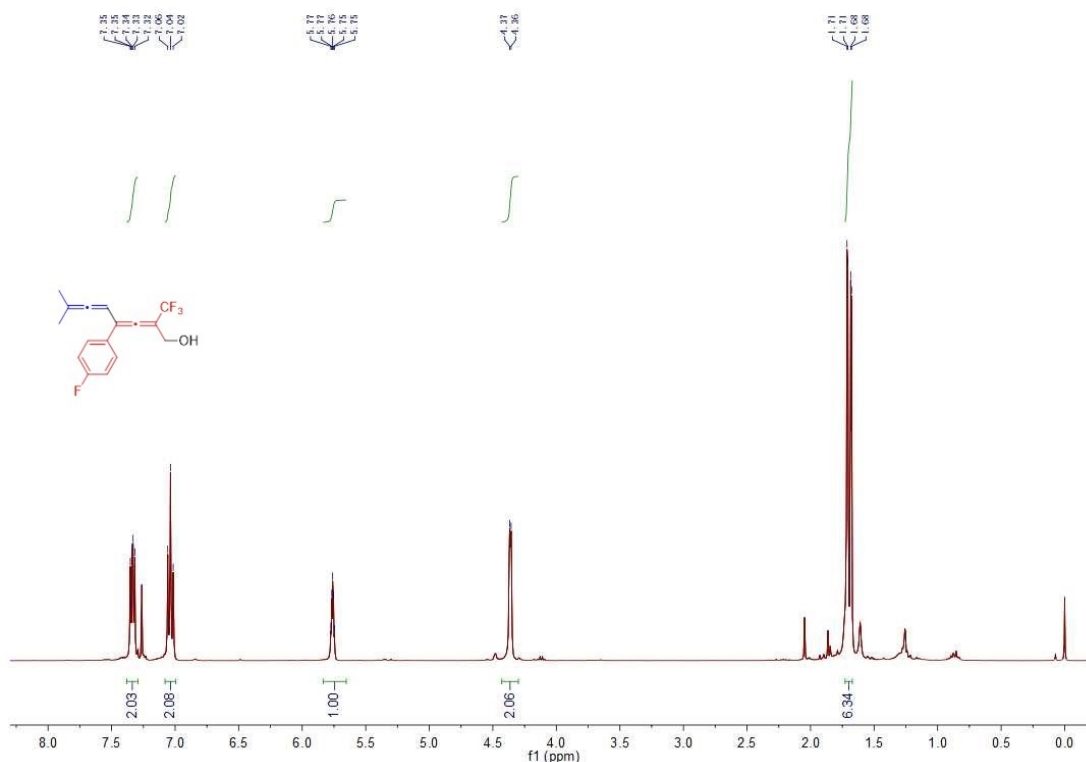

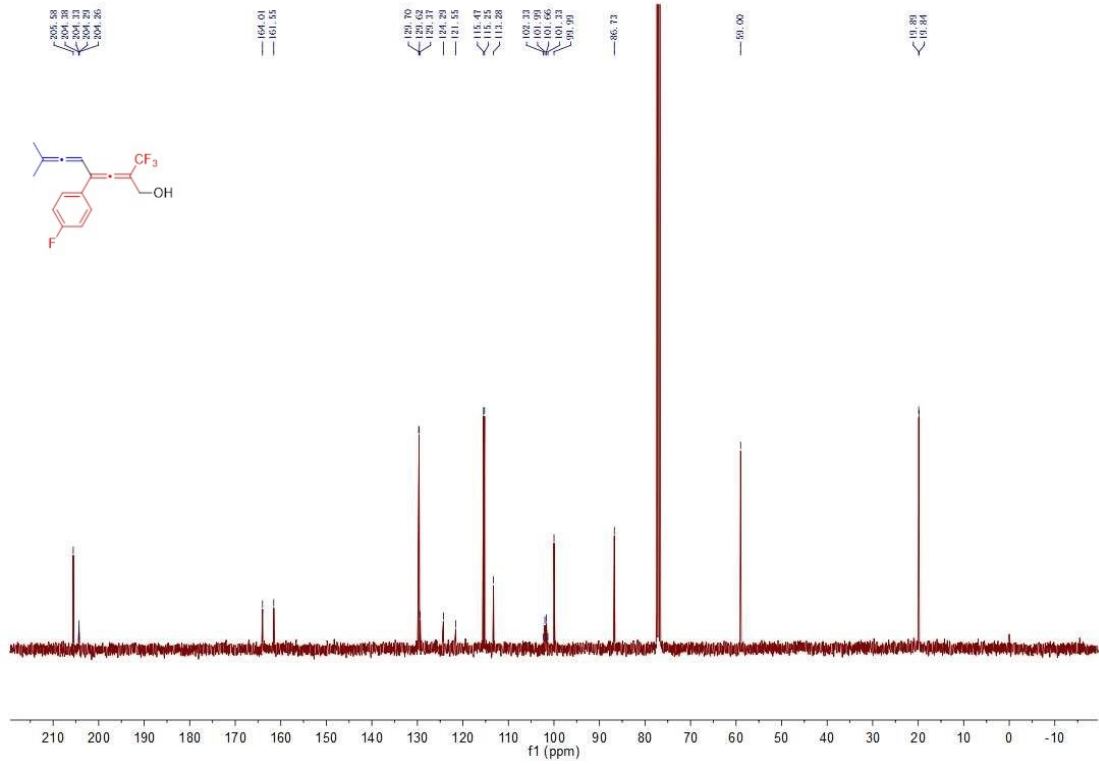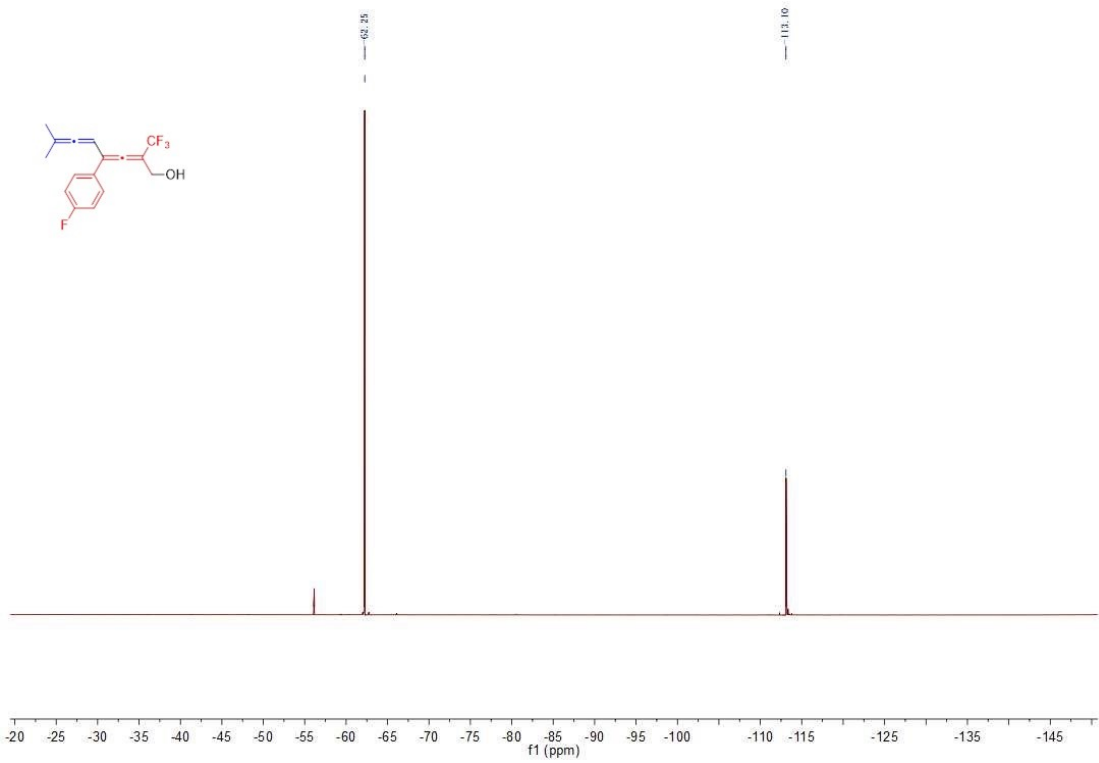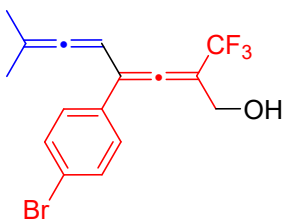

### 4-(4-bromophenyl)-7-methyl-2-(trifluoromethyl)octa-2,3,5,6-tetraen-1-ol (3i)

After isolated and purified procedure, this compound was obtained 22.9 mg (64% yield) as colorless oil. (Petroleum ether : EtOAc = 5 : 1)

$^1\text{H}$  NMR (400 MHz,  $\text{CDCl}_3$ )  $\delta$  7.47 (d,  $J = 8.4$  Hz, 2H), 7.23 (d,  $J = 8.5$  Hz, 2H), 5.75 (dt,  $J = 5.6, 2.7$  Hz, 1H), 4.36 (s, 2H), 1.70 (dd,  $J = 10.2, 2.8$  Hz, 6H).

$^{13}\text{C}$  NMR (101 MHz,  $\text{CDCl}_3$ )  $\delta$  205.6, 204.4 (q,  $J = 4.0$  Hz), 132.5, 131.5, 129.5, 122.8 (q,  $J = 275.0$  Hz), 122.6, 113.3, 102.1 (q,  $J = 33.3$  Hz), 100.1, 86.4, 58.9, 19.9, 19.8.

$^{19}\text{F}$  NMR (376 MHz,  $\text{CDCl}_3$ )  $\delta$  -62.21.

HRMS (ESI) calculated for  $\text{C}_{16}\text{H}_{15}\text{BrF}_3\text{O}^+$   $[\text{M}+\text{H}]^+$  359.0253; found 359.0257.

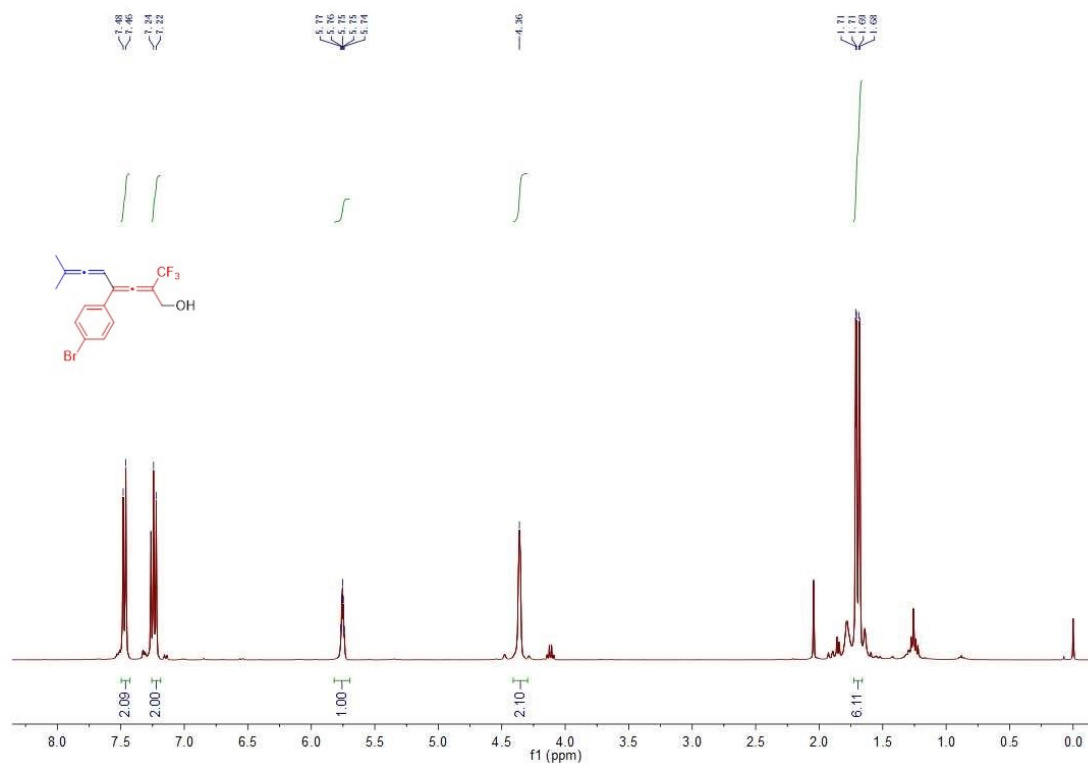

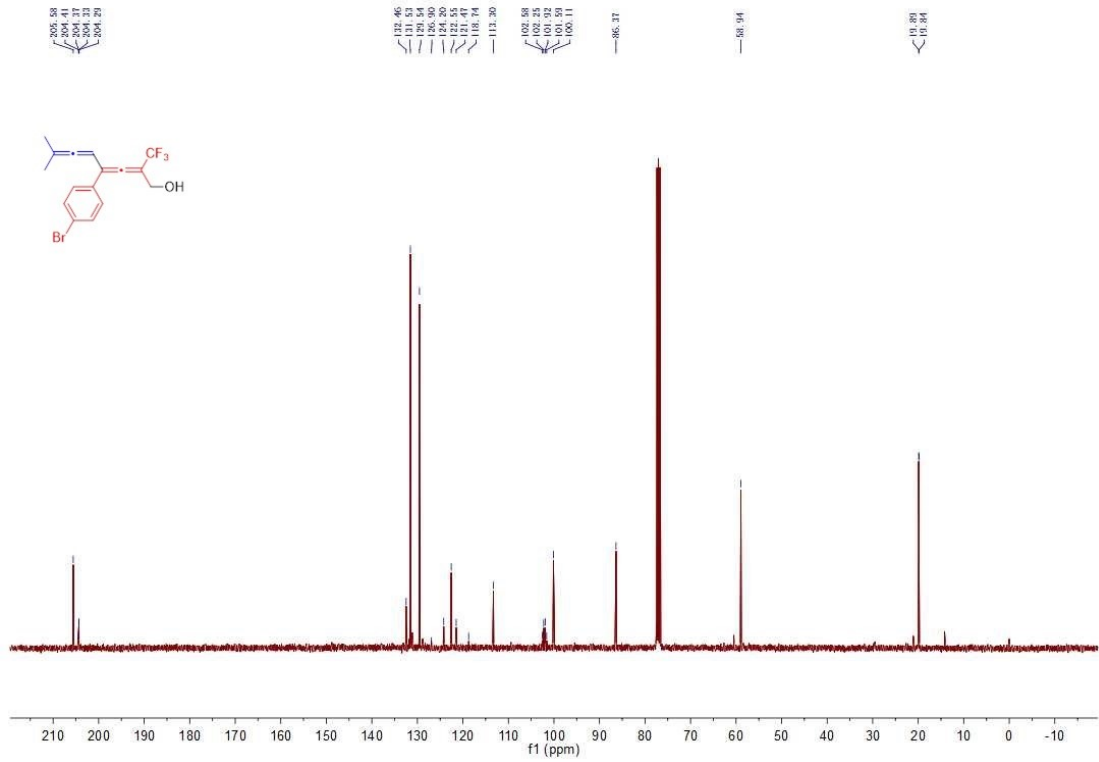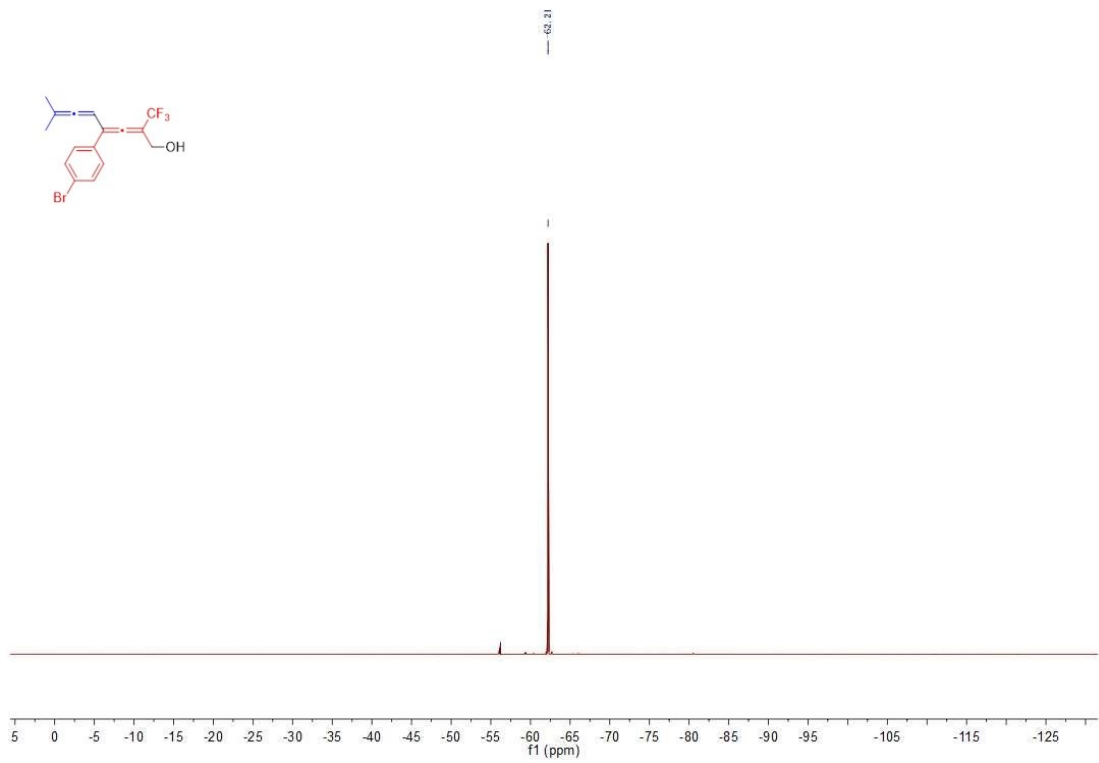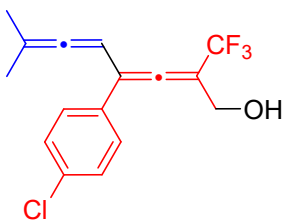

### 4-(4-chlorophenyl)-7-methyl-2-(trifluoromethyl)octa-2,3,5,6-tetraen-1-ol (3j)

After isolated and purified procedure, this compound was obtained 20.7 mg (66% yield) as colorless oil. (Petroleum ether : EtOAc = 5 : 1)

$^1\text{H}$  NMR (400 MHz,  $\text{CDCl}_3$ )  $\delta$  7.39-7.28 (m, 4H), 5.75 (dt,  $J = 5.7, 2.9$  Hz, 1H), 4.36 (d,  $J = 3.4$  Hz, 2H), 1.70 (dd,  $J = 10.6, 2.7$  Hz, 6H).

$^{13}\text{C}$  NMR (101 MHz,  $\text{CDCl}_3$ )  $\delta$  205.6, 204.4 (q,  $J = 4.0$  Hz), 134.4, 132.0, 129.2, 128.6, 128.2, 122.9 (q,  $J = 275.1$  Hz), 113.3, 102.1 (q,  $J = 33.3$  Hz), 100.1, 86.4, 59.0, 19.9, 19.8.

$^{19}\text{F}$  NMR (376 MHz,  $\text{CDCl}_3$ )  $\delta$  -62.22.

HRMS (ESI) calculated for  $\text{C}_{16}\text{H}_{15}\text{ClF}_3\text{O}^+$   $[\text{M}+\text{H}]^+$  315.0758; found 315.0755.

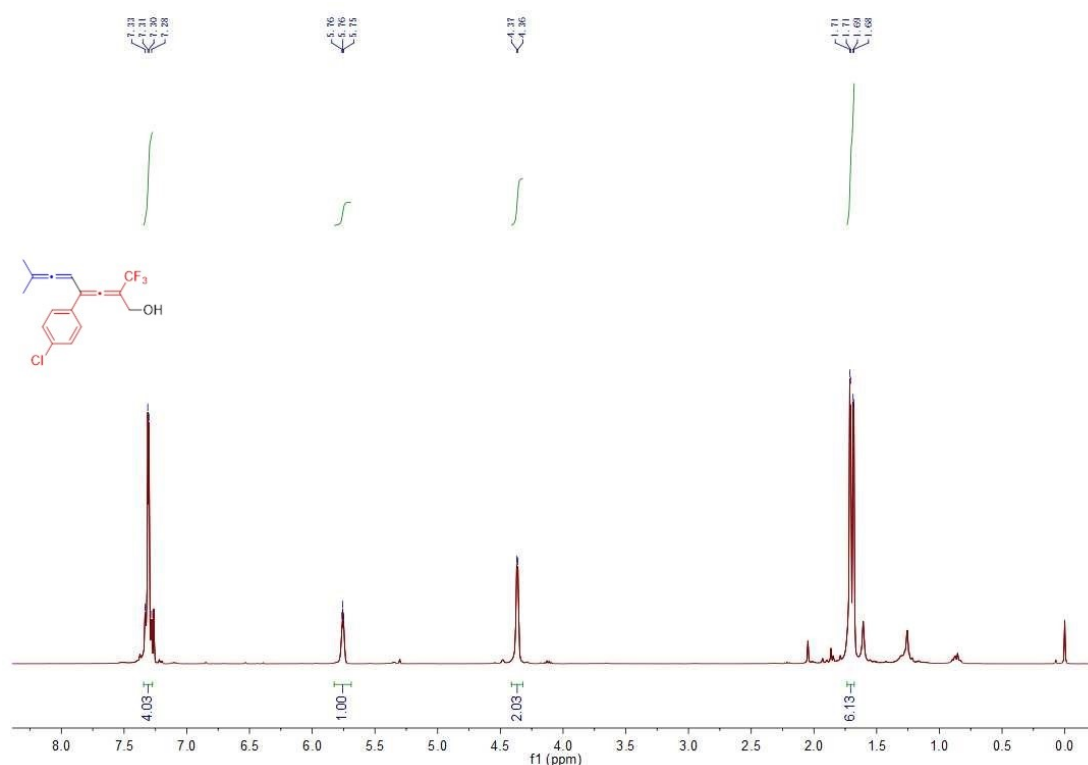

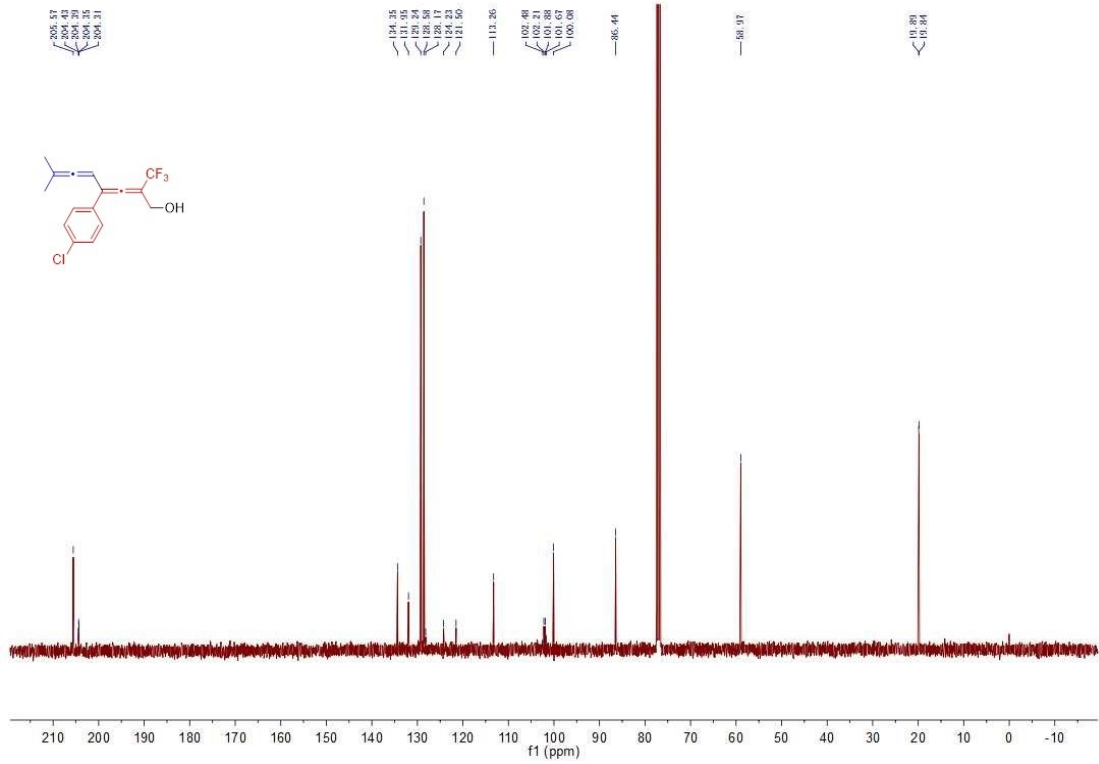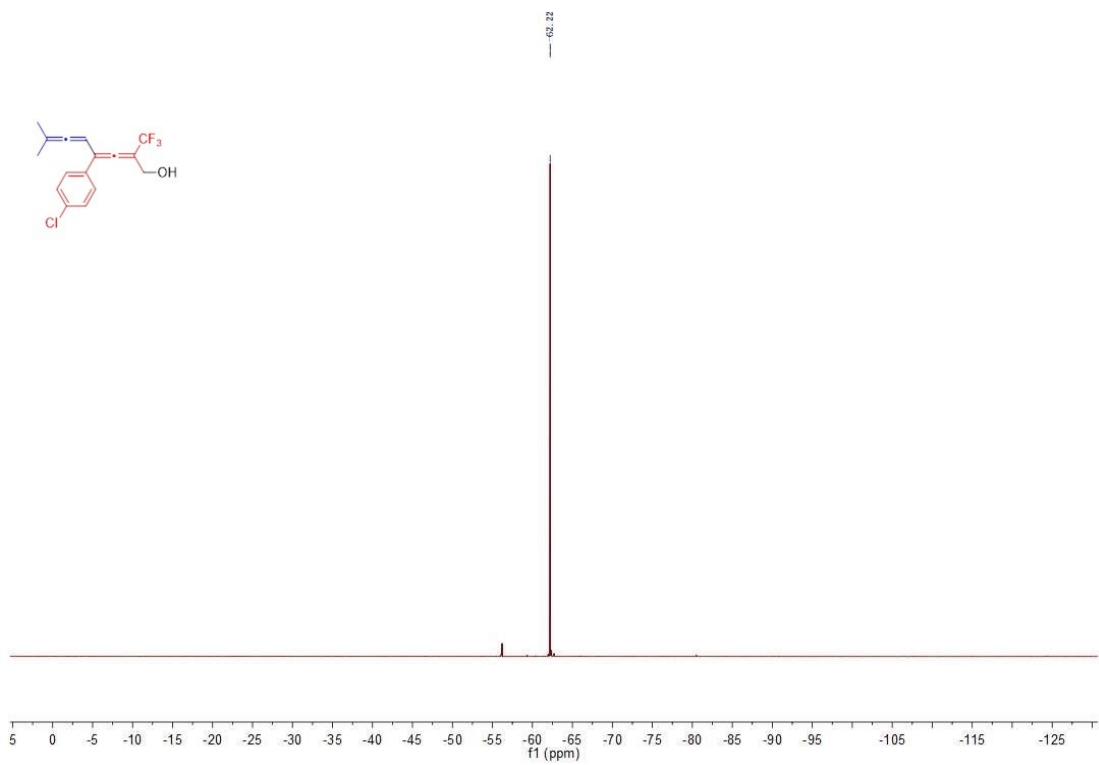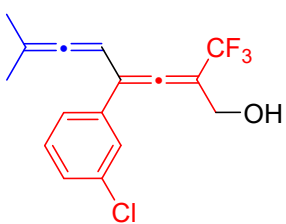



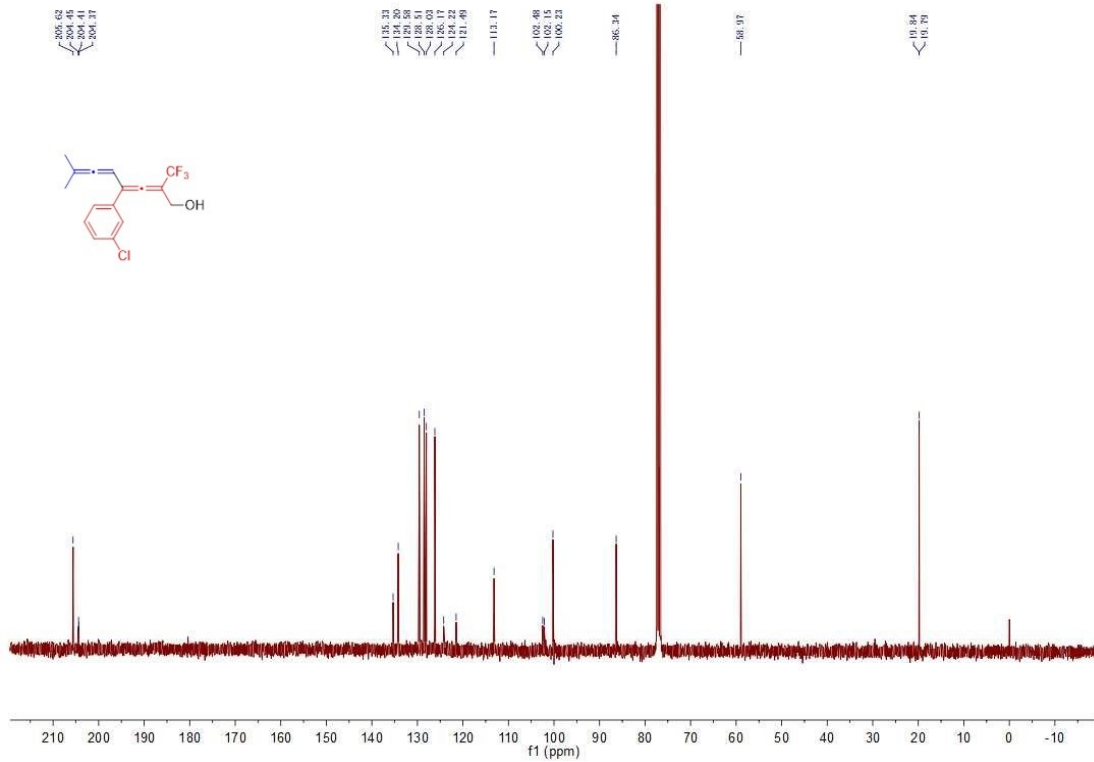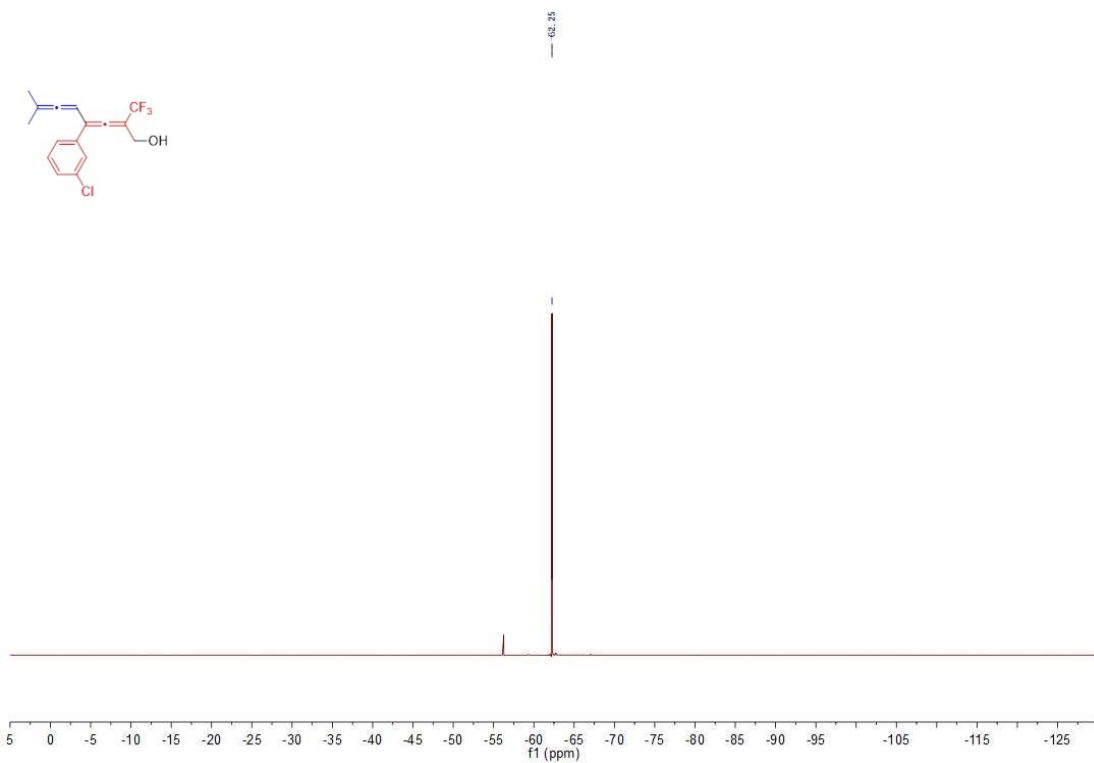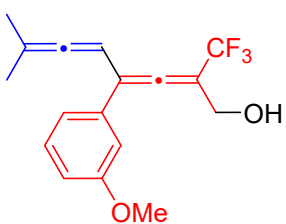



### 4-(3-methoxyphenyl)-7-methyl-2-(trifluoromethyl)octa-2,3,5,6-tetraen-1-ol (3l)

After isolated and purified procedure, this compound was obtained 15.8 mg (51% yield) as colorless oil. (Petroleum ether : EtOAc = 5 : 1)

$^1\text{H}$  NMR (400 MHz,  $\text{CDCl}_3$ )  $\delta$  7.33-7.20 (m, 1H), 7.03-6.92 (m, 2H), 6.89-6.82 (m, 1H), 5.75 (dt,  $J = 5.6, 2.8$  Hz, 1H), 4.35 (s, 2H), 3.81 (s, 3H), 1.71 (dd,  $J = 11.1, 2.7$  Hz, 6H).

$^{13}\text{C}$  NMR (101 MHz,  $\text{CDCl}_3$ )  $\delta$  205.5, 204.6 (q,  $J = 4.2$  Hz), 159.5, 134.8, 129.4, 123.0 (q,  $J = 275.1$  Hz), 121.6, 120.4, 114.1, 114.0, 113.4, 101.8 (q,  $J = 33.2$  Hz), 99.6, 86.4, 59.1, 55.2, 20.0, 19.9.

$^{19}\text{F}$  NMR (376 MHz,  $\text{CDCl}_3$ )  $\delta$  -62.17.

HRMS (ESI) calculated for  $\text{C}_{17}\text{H}_{18}\text{F}_3\text{O}_2^+ [\text{M}+\text{H}]^+$  311.1253; found 311.1256.

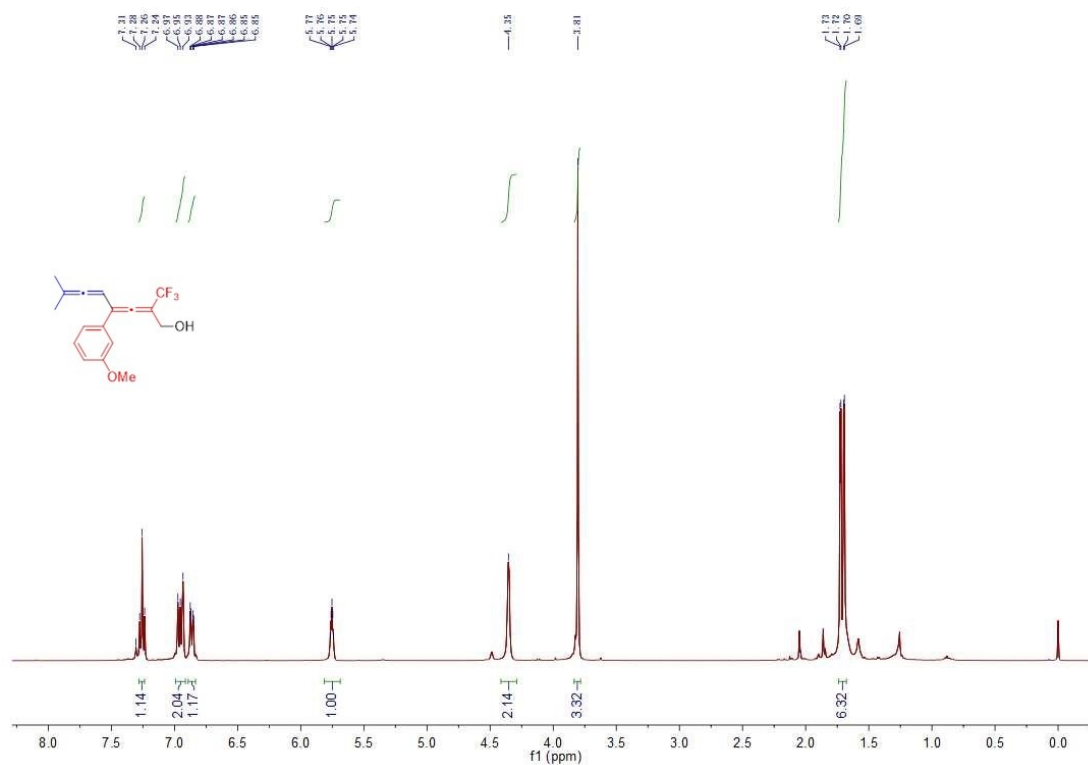

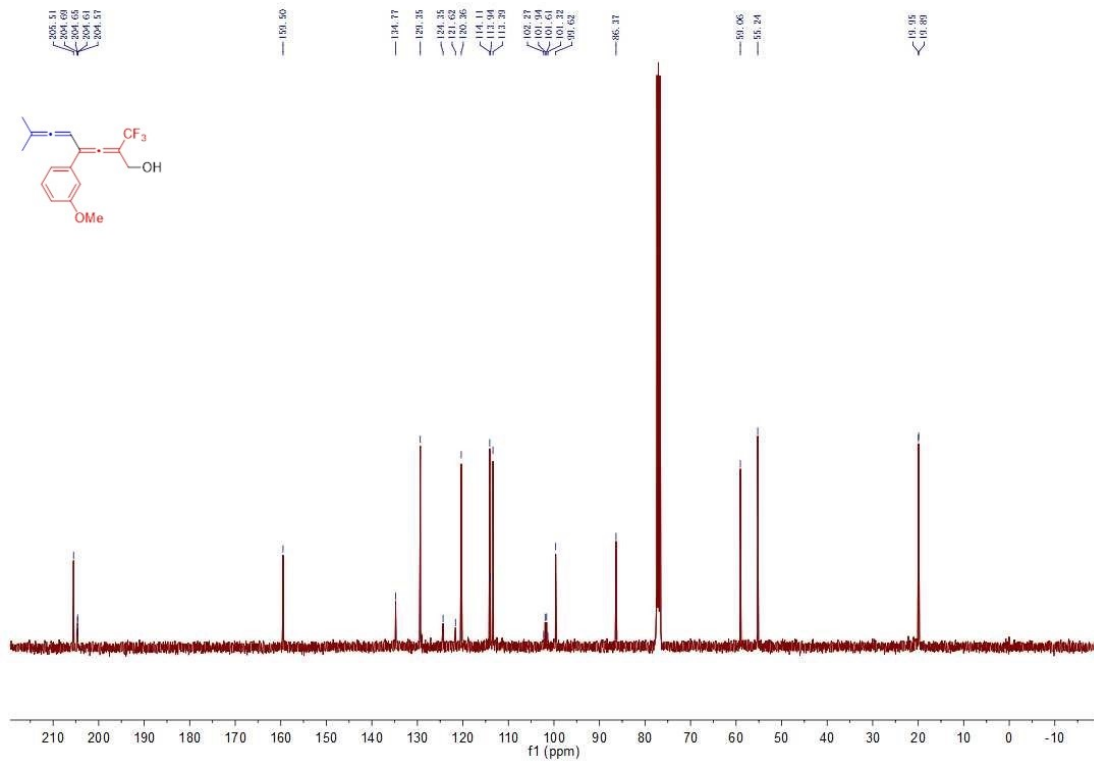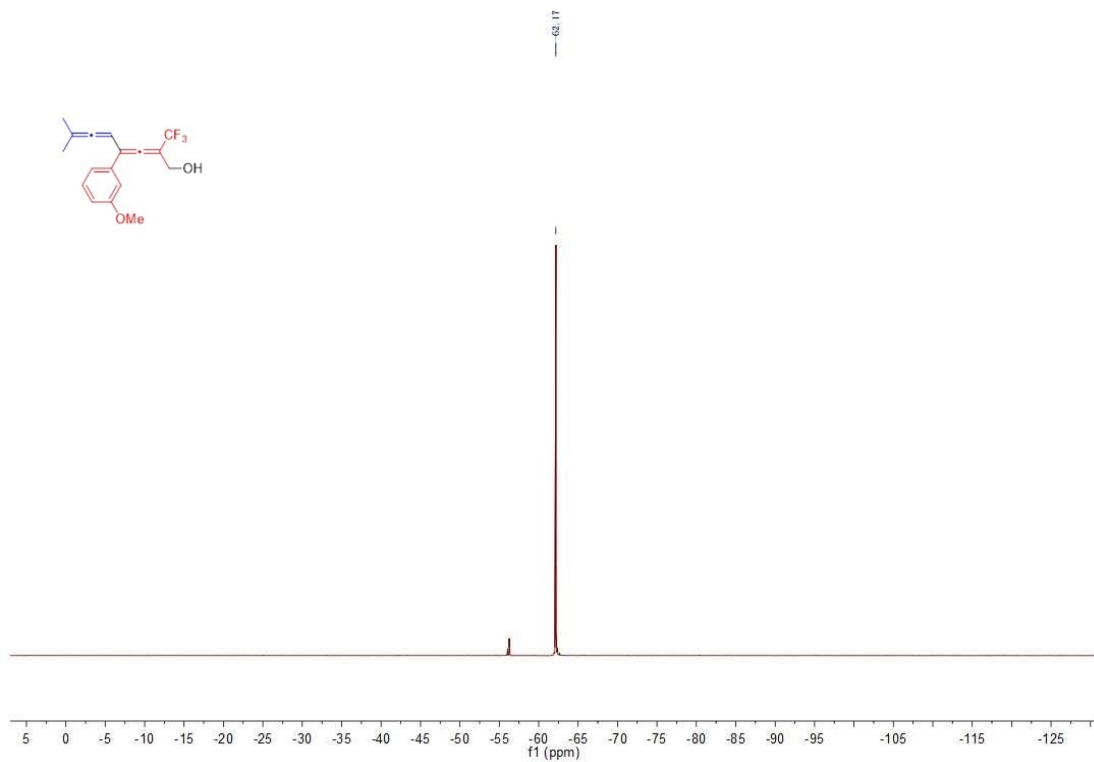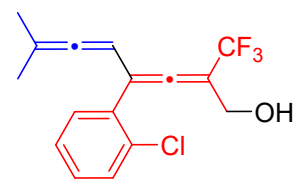

**4-(2-chlorophenyl)-7-methyl-2-(trifluoromethyl)octa-2,3,5,6-tetraen-1-ol (3m)**

After isolated and purified procedure, this compound was obtained 17.9 mg (57% yield) as colorless oil. (Petroleum ether : EtOAc = 5 : 1)

$^1\text{H}$  NMR (400 MHz,  $\text{CDCl}_3$ )  $\delta$  7.51-7.32 (m, 1H), 7.25-7.23 (m, 3H), 5.77 (dt,  $J = 5.5, 2.7$  Hz, 1H), 4.36 (s, 2H), 1.54 (dd,  $J = 4.7, 2.8$  Hz, 6H).

$^{13}\text{C}$  NMR (101 MHz,  $\text{CDCl}_3$ )  $\delta$  205.8, 202.5 (q,  $J = 4.2$  Hz), 133.2, 132.9, 130.7, 129.6, 129.4, 126.6, 122.8 (q,  $J = 274.7$  Hz), 112.0, 101.2 (q,  $J = 33.3$  Hz), 100.7, 88.4, 58.8, 19.5, 19.4.

$^{19}\text{F}$  NMR (376 MHz,  $\text{CDCl}_3$ )  $\delta$  -62.28.

HRMS (ESI) calculated for  $\text{C}_{16}\text{H}_{15}\text{ClF}_3\text{O}^+$   $[\text{M}+\text{H}]^+$  315.0758; found 315.0751

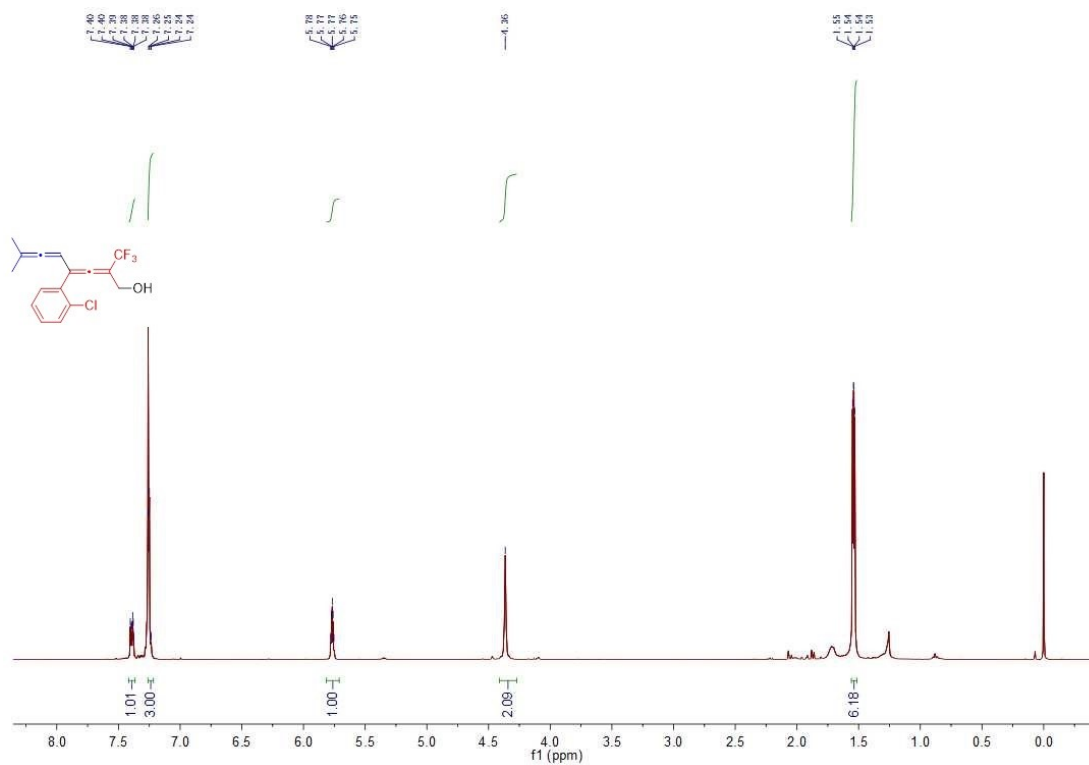

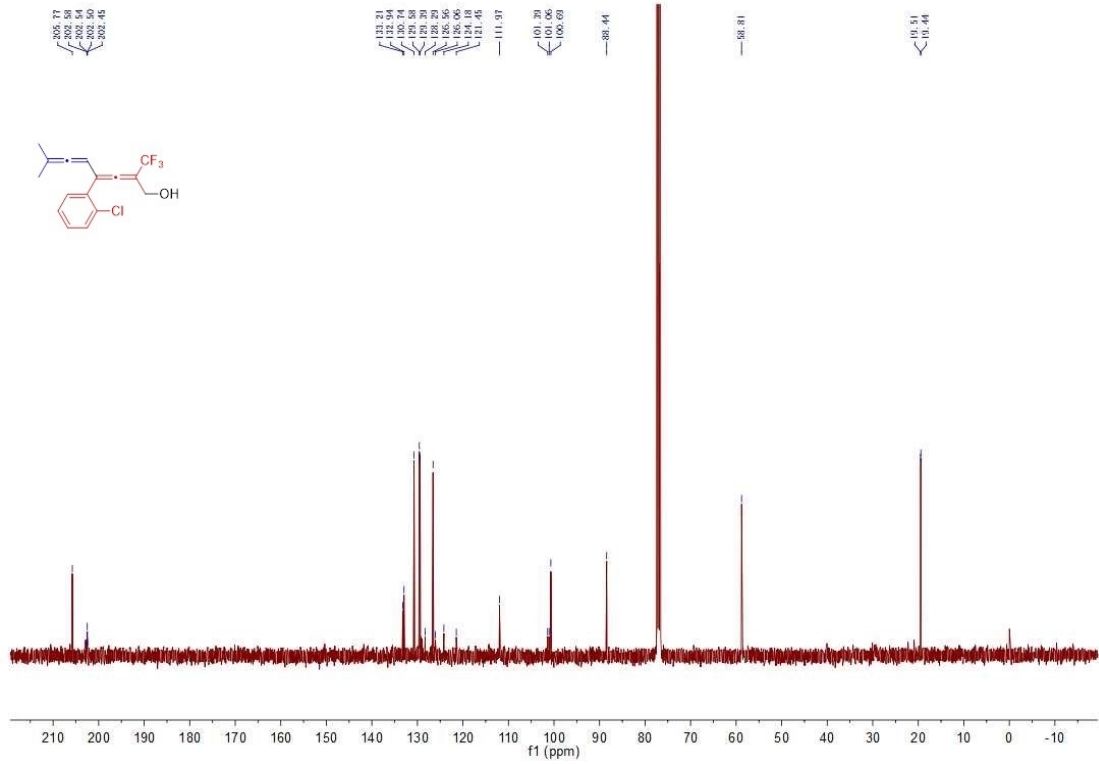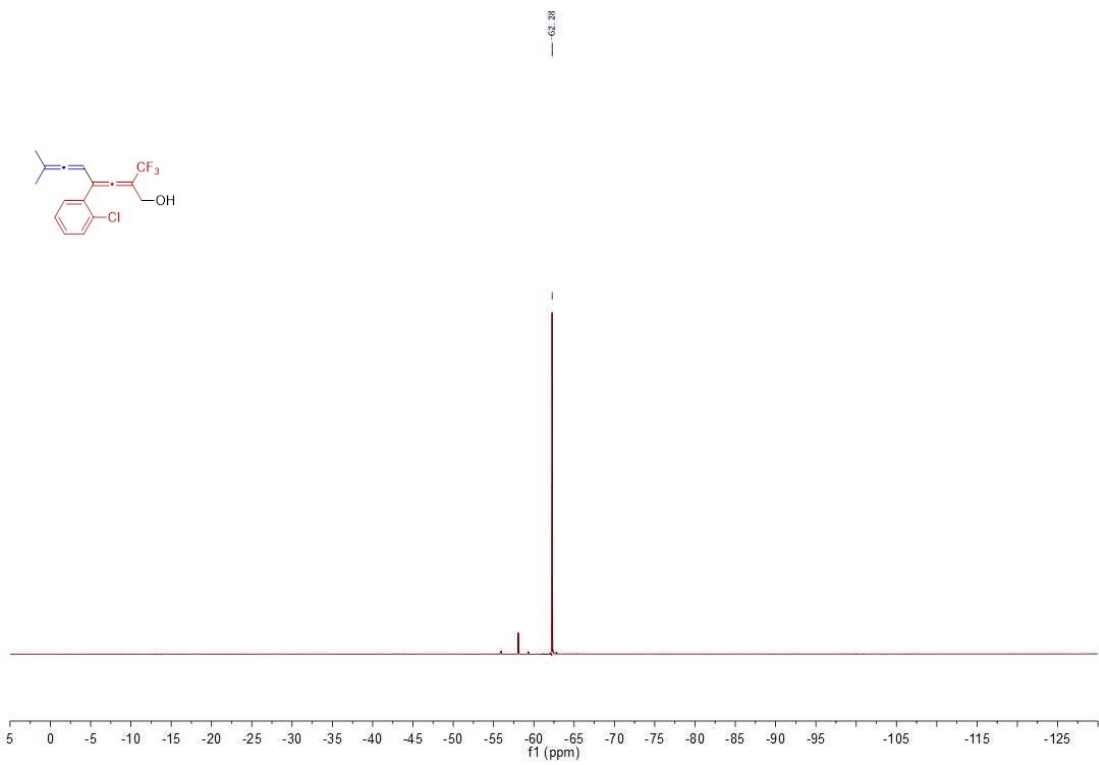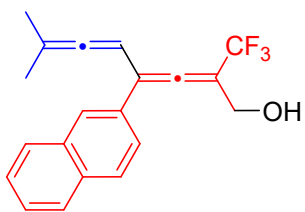

### 7-methyl-4-(naphthalen-2-yl)-2-(trifluoromethyl)octa-2,3,5,6-tetraen-1-ol (3n)

After isolated and purified procedure, this compound was obtained 20.8 mg (63% yield) as colorless oil. (Petroleum ether : EtOAc = 5 : 1)

$^1\text{H}$  NMR (400 MHz,  $\text{CDCl}_3$ )  $\delta$  8.23-7.65 (m, 4H), 7.61-7.38 (m, 3H), 5.87 (dt,  $J = 5.6, 2.7$  Hz, 1H), 4.40 (s, 2H), 1.72 (dd,  $J = 15.5, 2.7$  Hz, 6H).

$^{13}\text{C}$  NMR (101 MHz,  $\text{CDCl}_3$ )  $\delta$  205.7, 205.0 (q,  $J = 4.0$  Hz), 133.2, 133.2, 130.7, 128.2, 128.0, 127.7, 126.9, 126.5, 126.4, 125.9, 123.0 (q,  $J = 275.1$  Hz), 114.2, 102.0 (q,  $J = 33.2$  Hz), 99.8, 86.5, 59.1, 19.9, 19.9.

$^{19}\text{F}$  NMR (376 MHz,  $\text{CDCl}_3$ )  $\delta$  -62.11.

HRMS (ESI) calculated for  $\text{C}_{20}\text{H}_{18}\text{F}_3\text{O}^+$   $[\text{M}+\text{H}]^+$  331.1304; found 331.1302.

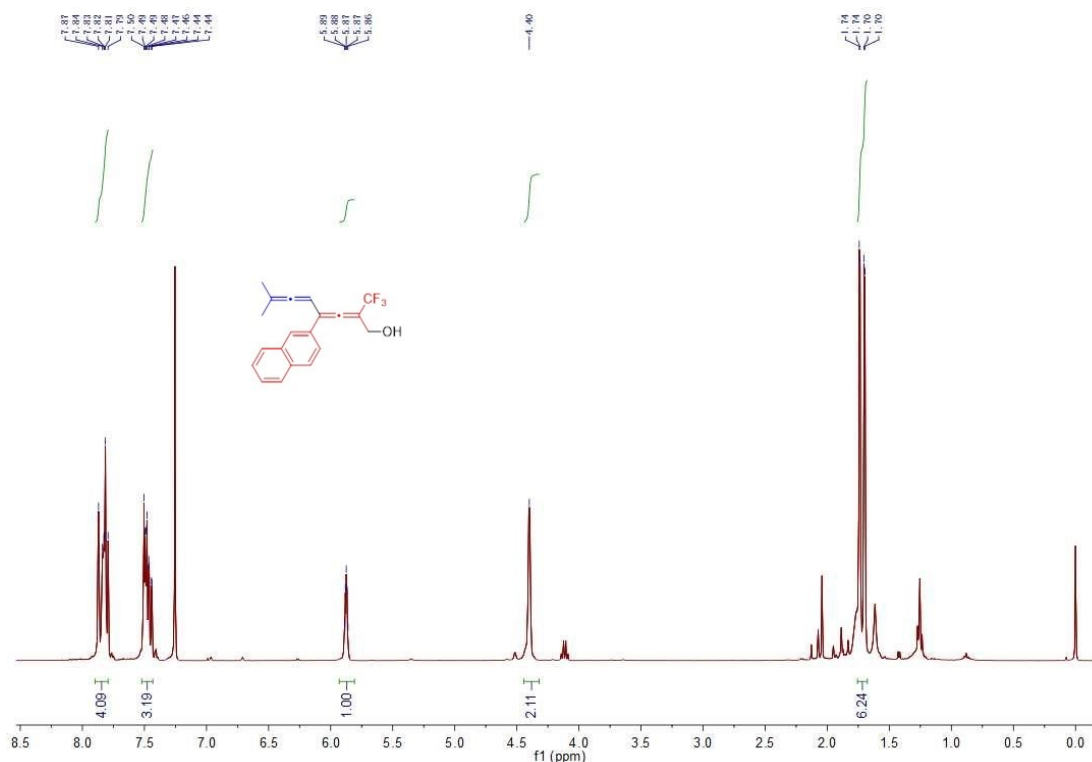

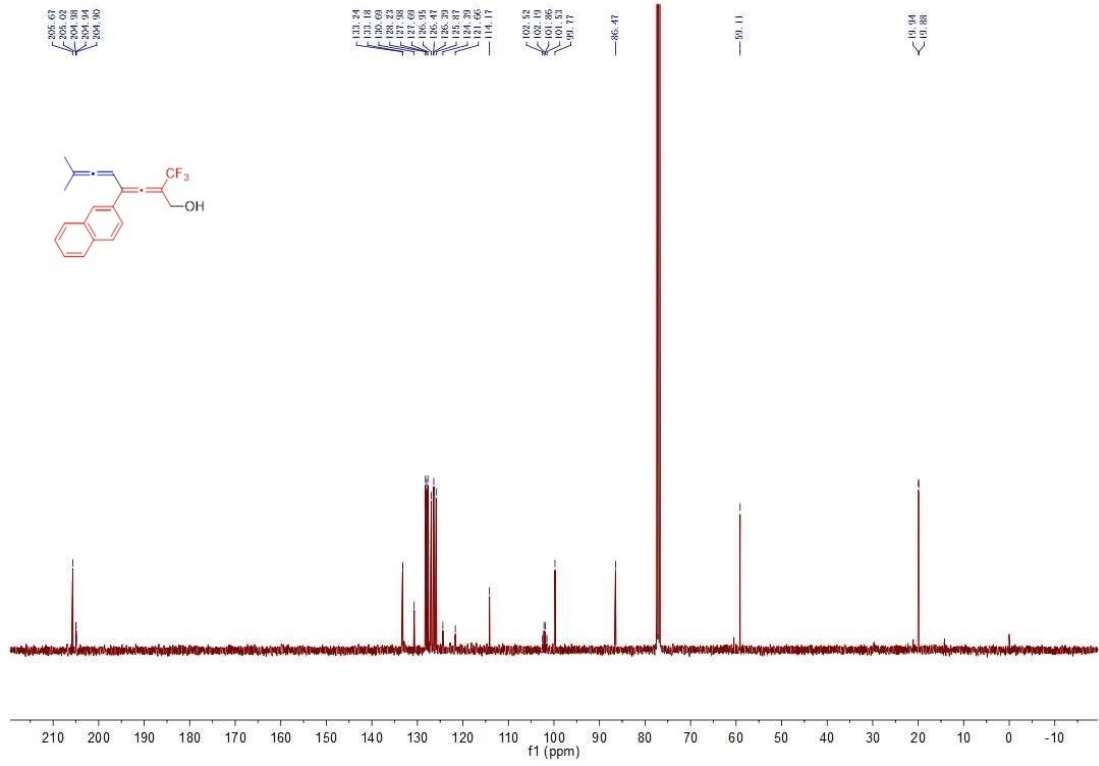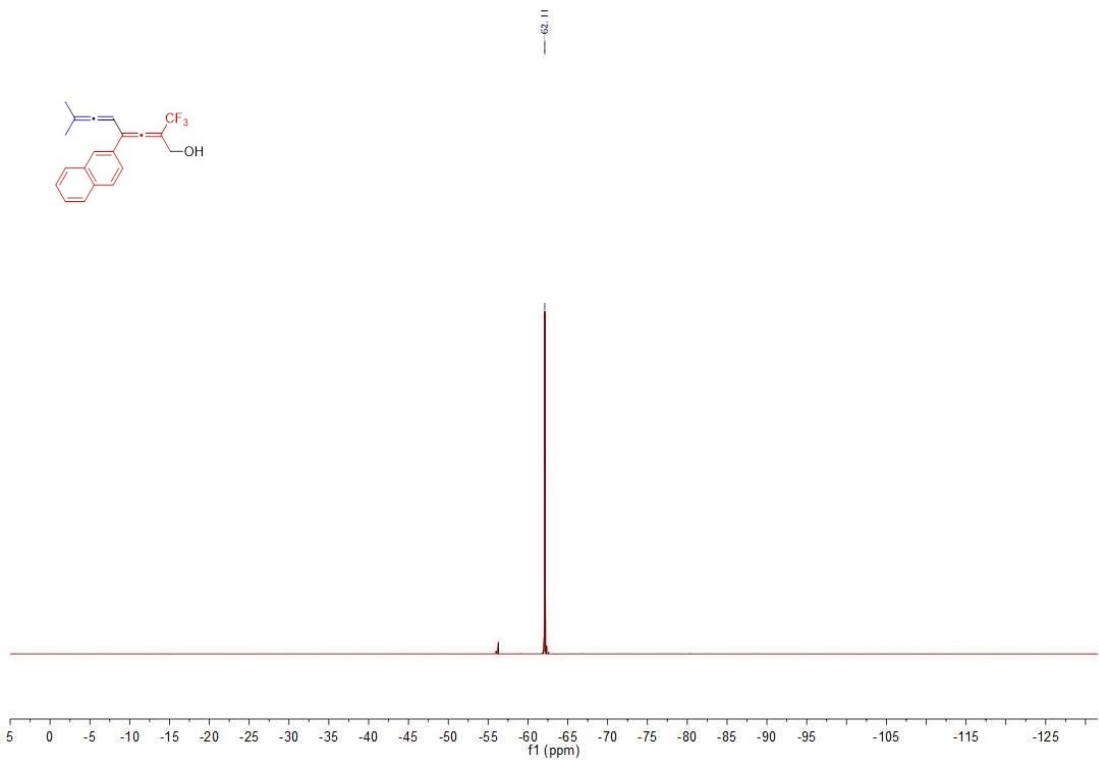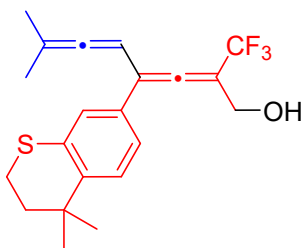

**4-(4,4-dimethylthiochroman-7-yl)-7-methyl-2-(trifluoromethyl)octa-2,3,5,6-tetraen-1-ol (3o)**

After isolated and purified procedure, this compound was obtained 25.4 mg (67% yield) as colorless oil. (Petroleum ether : EtOAc = 5 : 1)

$^1\text{H}$  NMR (400 MHz,  $\text{CDCl}_3$ )  $\delta$  7.41 (s, 1H), 7.17-6.93 (m, 2H), 5.88-5.53 (m, 1H), 4.35 (d,  $J = 5.6$  Hz, 2H), 3.10-2.97 (m, 2H), 2.00-1.89 (m, 2H), 1.73 (dd,  $J = 15.2, 2.6$  Hz, 6H), 1.32 (s, 6H).

$^{13}\text{C}$  NMR (101 MHz,  $\text{CDCl}_3$ )  $\delta$  205.4, 204.9 (q,  $J = 4.0$  Hz), 141.9, 132.6, 128.8, 126.5, 125.8, 125.6, 123.0 (q,  $J = 275.1$  Hz), 101.6 (q,  $J = 33.1$  Hz), 99.6, 86.5, 59.1, 37.4, 33.1, 30.1, 23.1, 20.2, 20.1.

$^{19}\text{F}$  NMR (376 MHz,  $\text{CDCl}_3$ )  $\delta$  -62.15.

HRMS (ESI) calculated for  $\text{C}_{21}\text{H}_{24}\text{F}_3\text{OS}^+$   $[\text{M}+\text{H}]^+$  381.1494; found 381.1489.

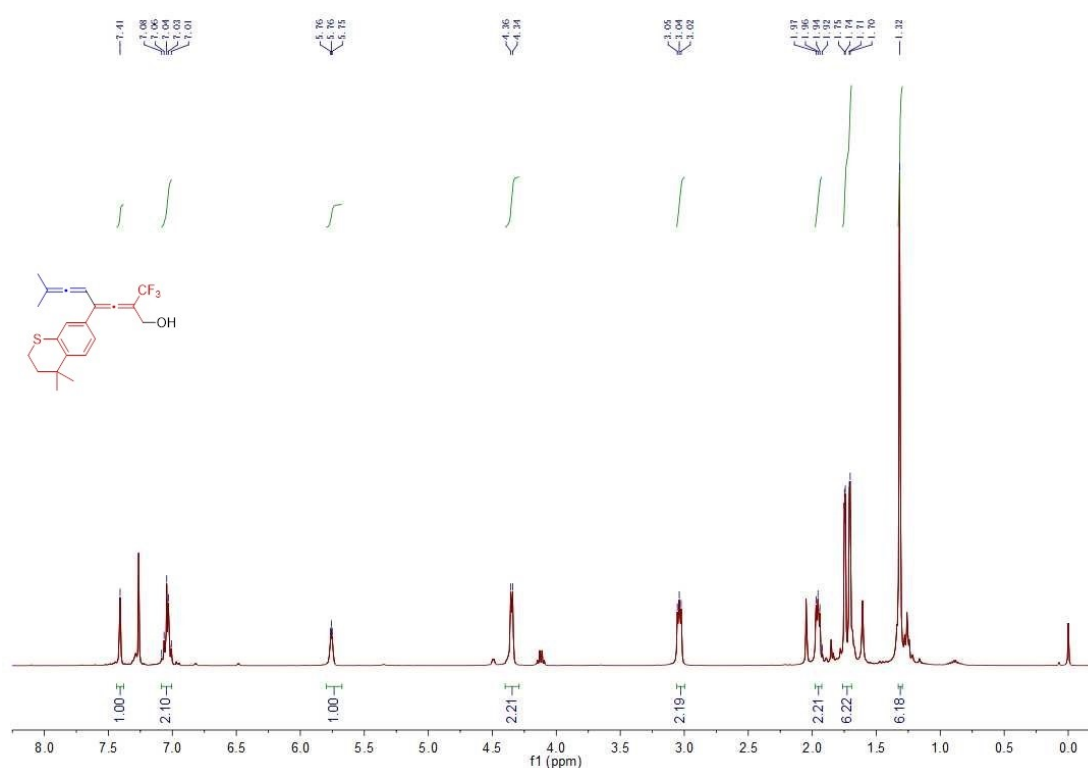

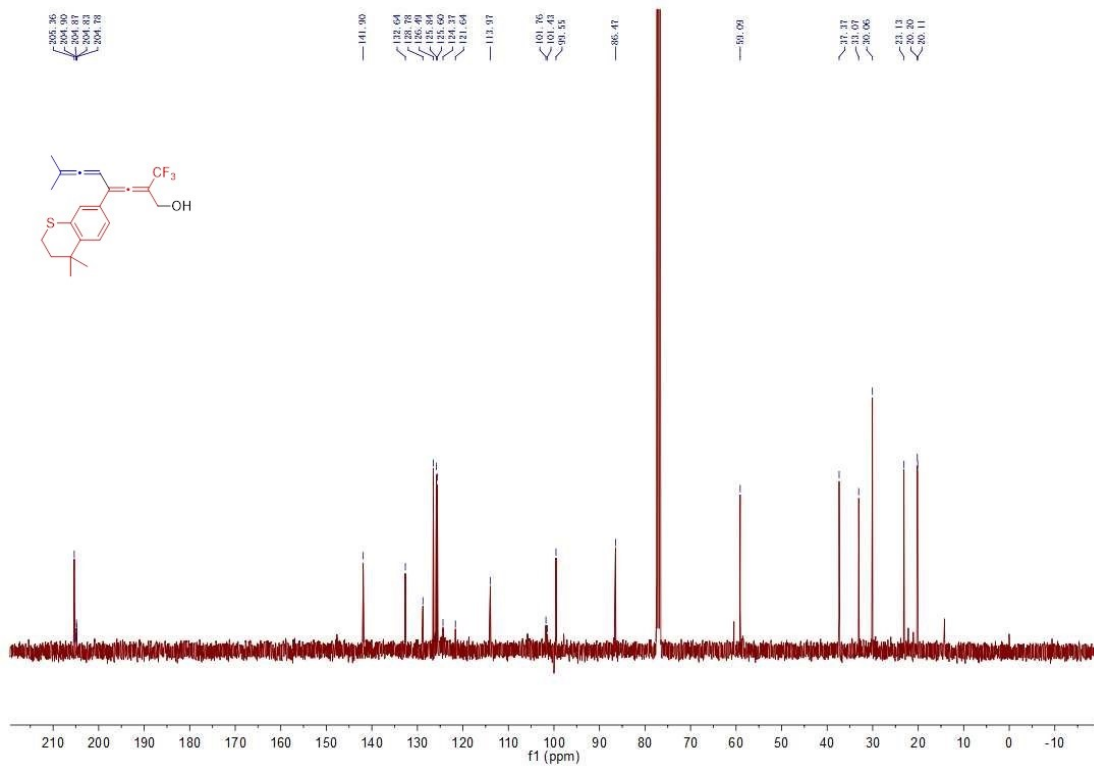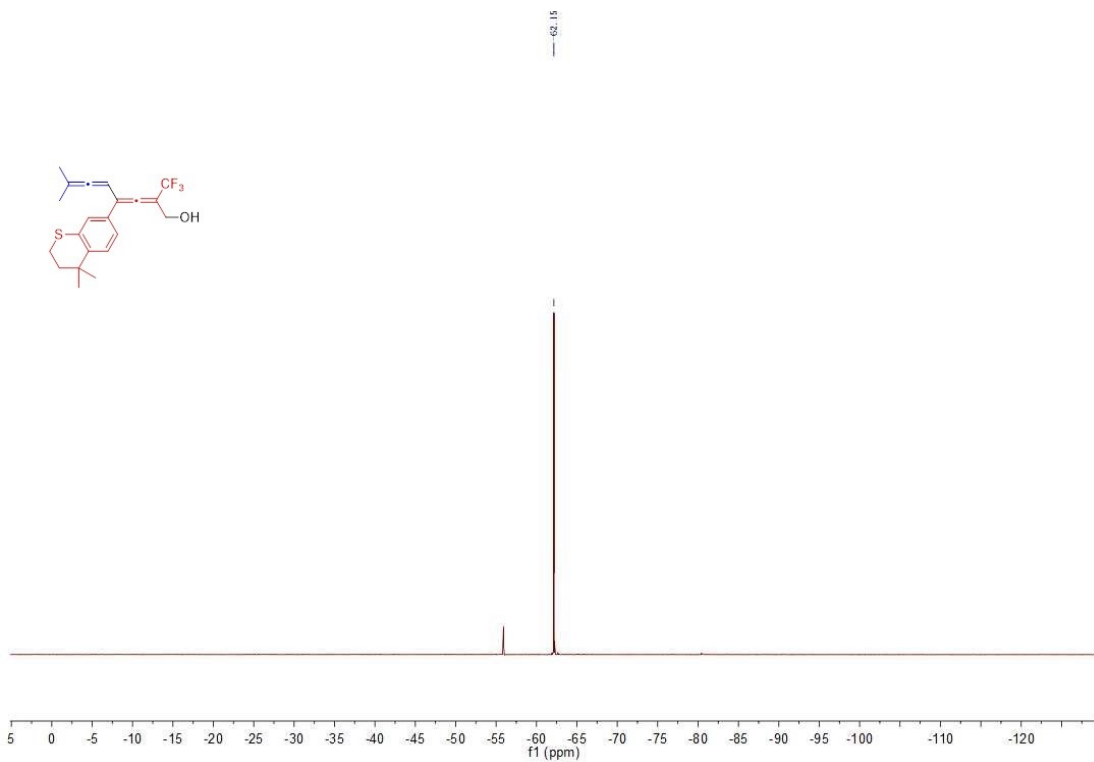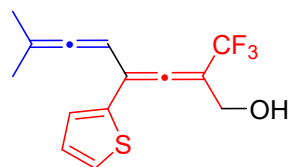

**7-methyl-4-(thiophen-2-yl)-2-(trifluoromethyl)octa-2,3,5,6-tetraen-1-ol (3p)**



After isolated and purified procedure, this compound was obtained 12.8 mg (45% yield) as colorless oil. (Petroleum ether : EtOAc = 5 : 1)

$^1\text{H}$  NMR (400 MHz,  $\text{CDCl}_3$ )  $\delta$  7.32 (d,  $J = 5.0$  Hz, 1H), 7.16 (d,  $J = 3.6$  Hz, 1H), 7.06-6.97 (m, 1H), 5.78 (dt,  $J = 5.5, 2.7$  Hz, 1H), 4.38 (d,  $J = 6.2$  Hz, 2H), 1.78 (dd,  $J = 6.3, 2.8$  Hz, 6H).

$^{13}\text{C}$  NMR (101 MHz,  $\text{CDCl}_3$ )  $\delta$  205.1, 204.7 (q,  $J = 4.1$  Hz), 135.0, 127.2, 126.6, 126.4, 122.6 (q,  $J = 275.5$  Hz), 108.7, 102.6 (q,  $J = 33.4$  Hz), 101.2, 86.3, 59.0, 20.2, 20.2.

$^{19}\text{F}$  NMR (376 MHz,  $\text{CDCl}_3$ )  $\delta$  -62.29.

HRMS (ESI) calculated for  $\text{C}_{14}\text{H}_{14}\text{F}_3\text{OS}^+$   $[\text{M}+\text{H}]^+$  287.0712; found 287.0713.

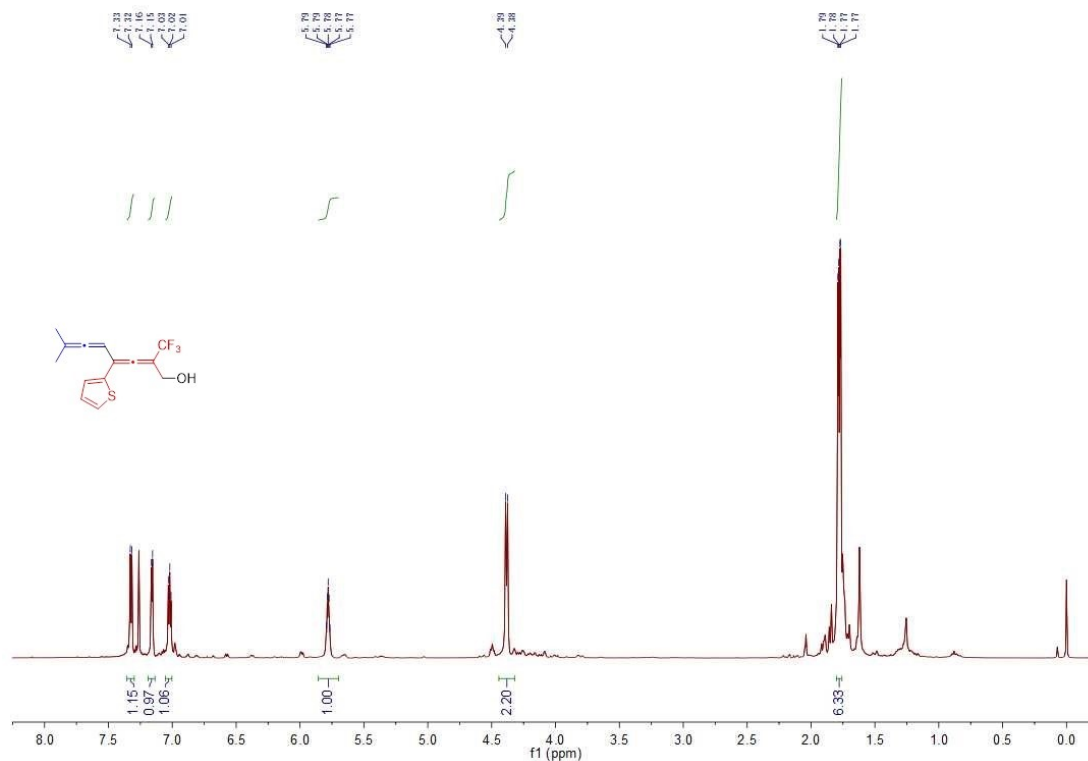

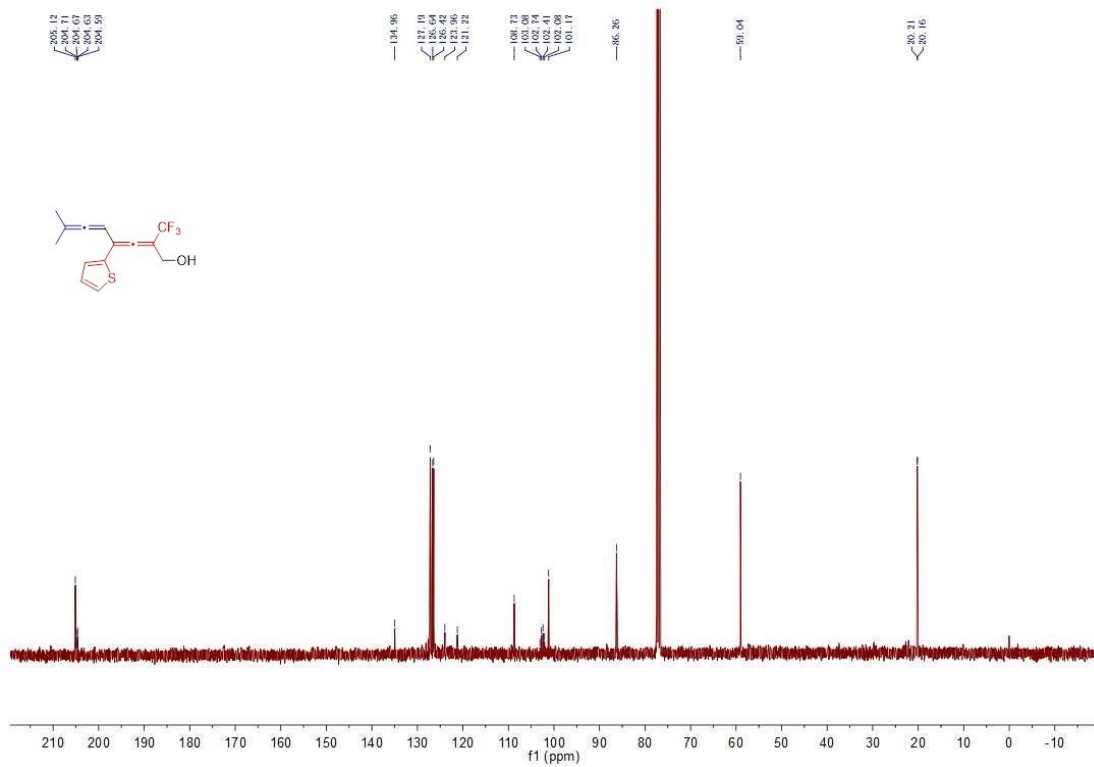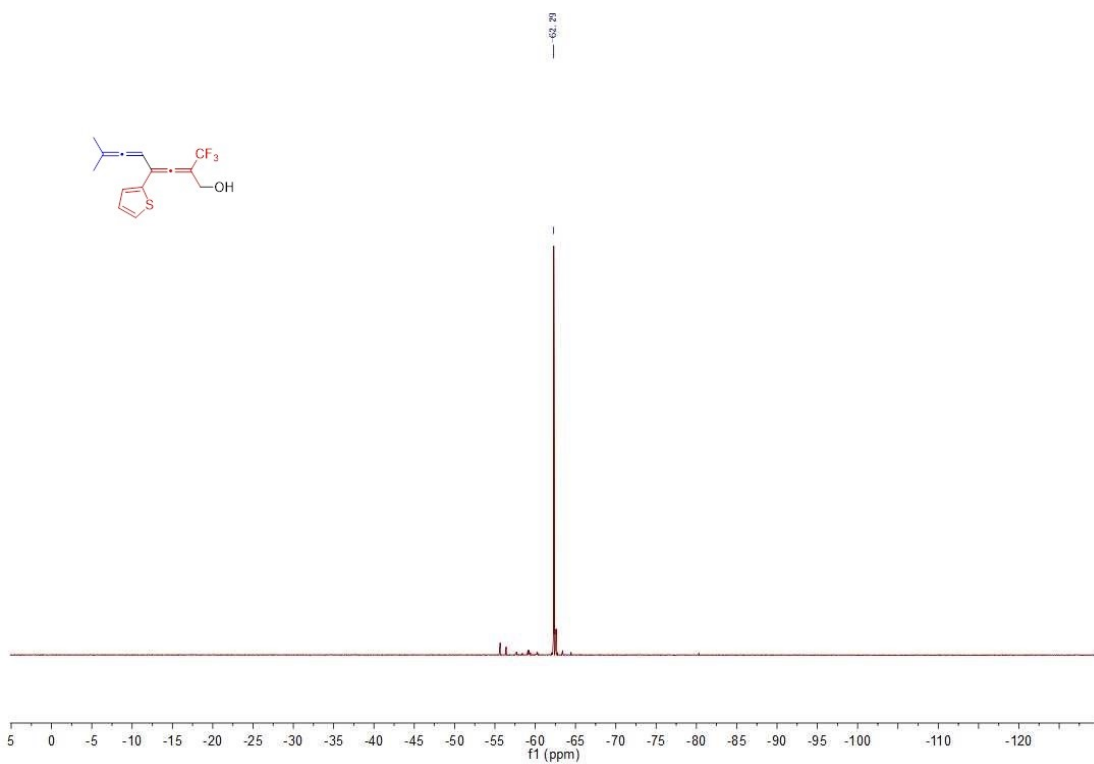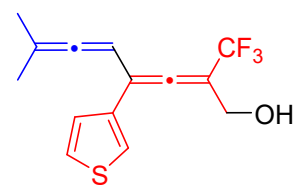

**7-methyl-4-(thiophen-3-yl)-2-(trifluoromethyl)octa-2,3,5,6-tetraen-1-ol (3q)**

After isolated and purified procedure, this compound was obtained 16.6 mg (58% yield) as colorless oil. (Petroleum ether : EtOAc = 5 : 1)

$^1\text{H}$  NMR (400 MHz,  $\text{CDCl}_3$ )  $\delta$  7.39 (dd,  $J = 2.9, 1.2$  Hz, 1H), 7.29 (dd,  $J = 5.0, 3.0$  Hz, 1H), 7.06 (dd,  $J = 5.0, 1.1$  Hz, 1H), 5.76 (dt,  $J = 5.8, 2.9$  Hz, 1H), 4.37 (d,  $J = 6.3$  Hz, 2H), 1.76 (dd,  $J = 8.8, 2.9$  Hz, 6H).

$^{13}\text{C}$  NMR (101 MHz,  $\text{CDCl}_3$ )  $\delta$  205.3 (q,  $J = 4.3$  Hz), 205.2, 133.3, 127.3, 125.5, 123.1, 122.8 (q,  $J = 275.2$  Hz), 109.2, 101.9 (q,  $J = 33.4$  Hz), 99.9, 86.2, 59.1, 20.1, 20.1.

$^{19}\text{F}$  NMR (376 MHz,  $\text{CDCl}_3$ )  $\delta$  -62.21.

HRMS (ESI) calculated for  $\text{C}_{14}\text{H}_{14}\text{F}_3\text{OS}^+$   $[\text{M}+\text{H}]^+$  287.0712; found 287.0715.

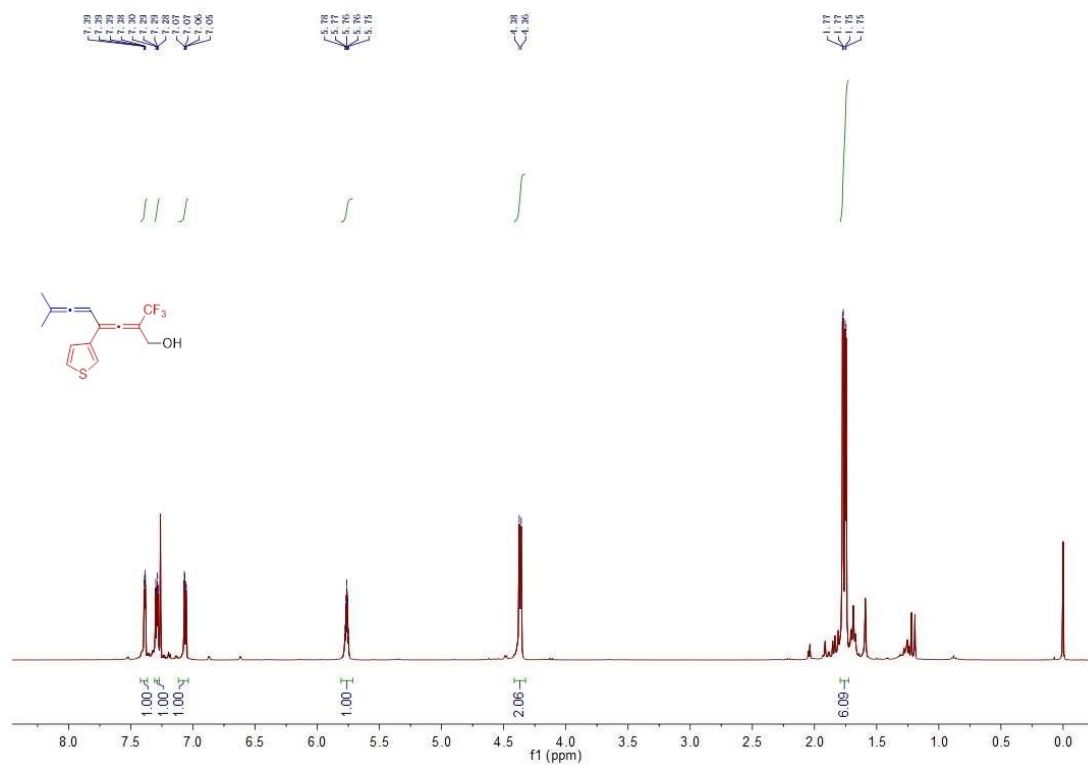

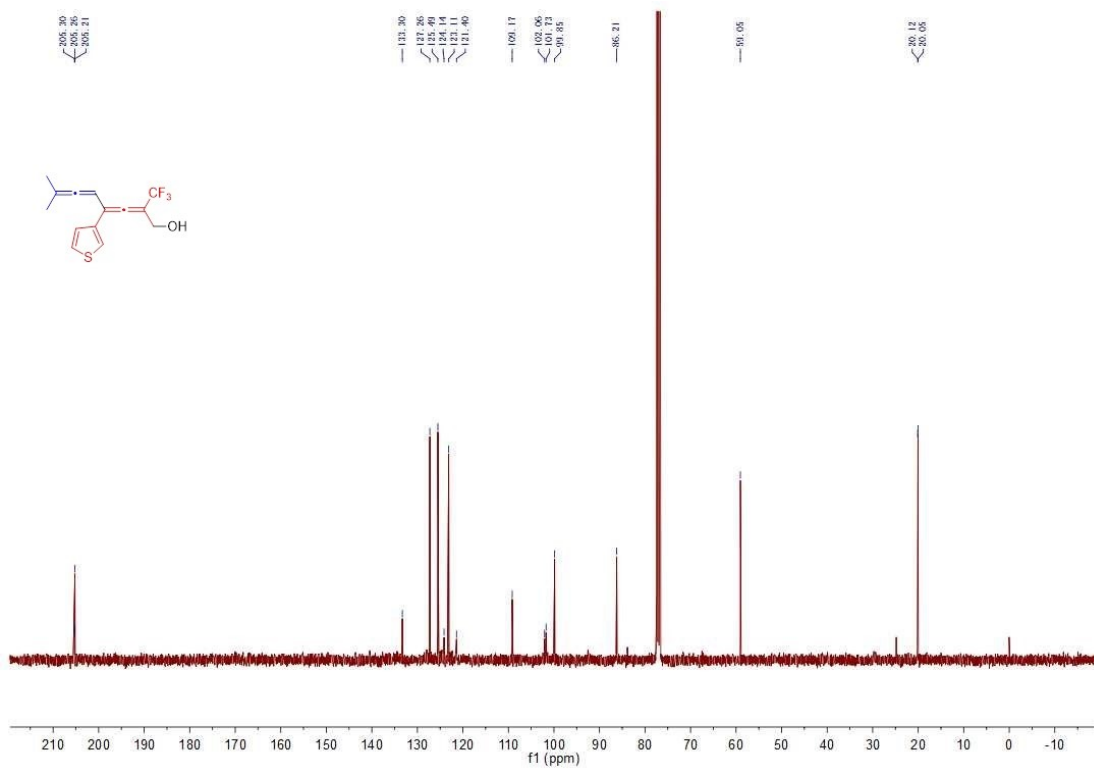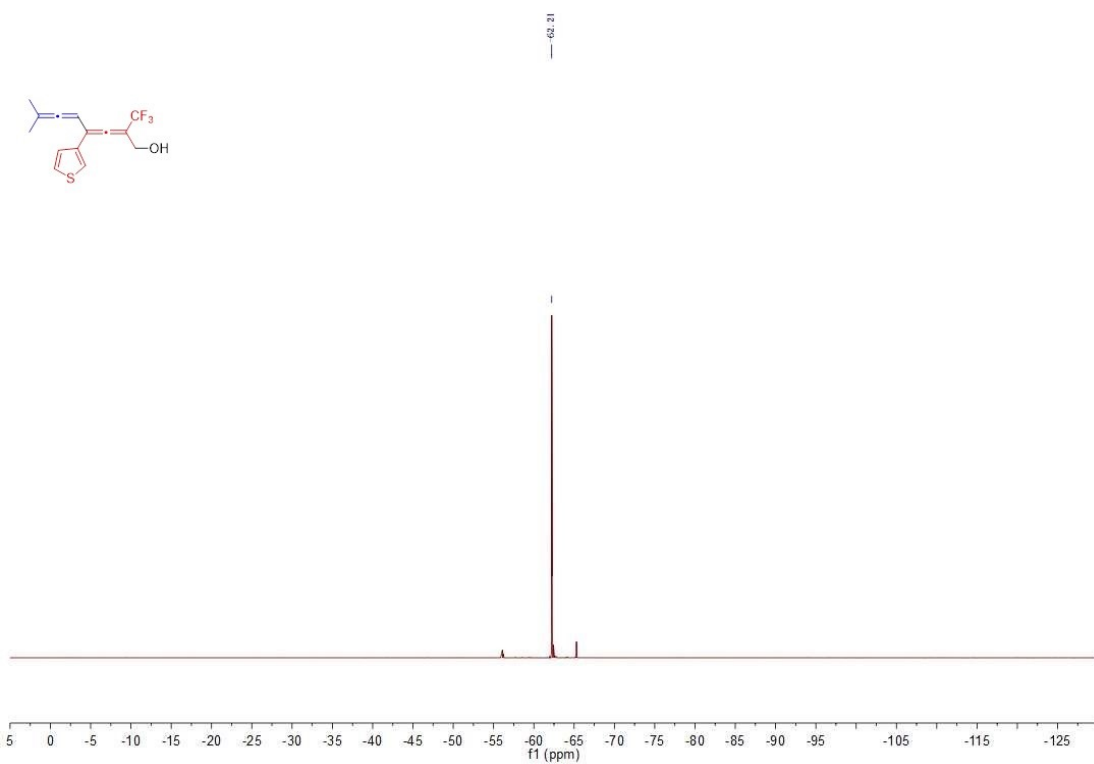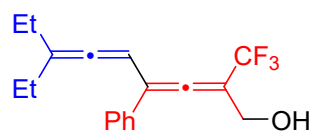

**7-ethyl-4-phenyl-2-(trifluoromethyl)nona-2,3,5,6-tetraen-1-ol (3aa)**

After isolated and purified procedure, this compound was obtained 20.3 mg (66% yield)

as colorless oil. (Petroleum ether : EtOAc = 5 : 1)

$^1\text{H}$  NMR (400 MHz,  $\text{CDCl}_3$ )  $\delta$  7.54-7.25 (m, 5H), 5.92 (t,  $J = 3.1$  Hz, 1H), 4.36 (s, 2H), 1.99 (tt,  $J = 6.5, 3.1$  Hz, 4H), 1.16-0.49 (m, 6H).

$^{13}\text{C}$  NMR (101 MHz,  $\text{CDCl}_3$ )  $\delta$  204.2, 204.1 (q,  $J = 4.4$  Hz), 133.6, 128.5, 127.7, 127.2, 123.0 (q,  $J = 274.8$  Hz), 114.3, 112.3, 102.0 (q,  $J = 33.5$  Hz), 89.9, 59.1, 29.7, 25.5, 25.4, 12.2, 12.1.

$^{19}\text{F}$  NMR (376 MHz,  $\text{CDCl}_3$ )  $\delta$  -62.21.

HRMS (ESI) calculated for  $\text{C}_{18}\text{H}_{20}\text{F}_3\text{O}^+$   $[\text{M}+\text{H}]^+$  309.1461; found 309.1467.

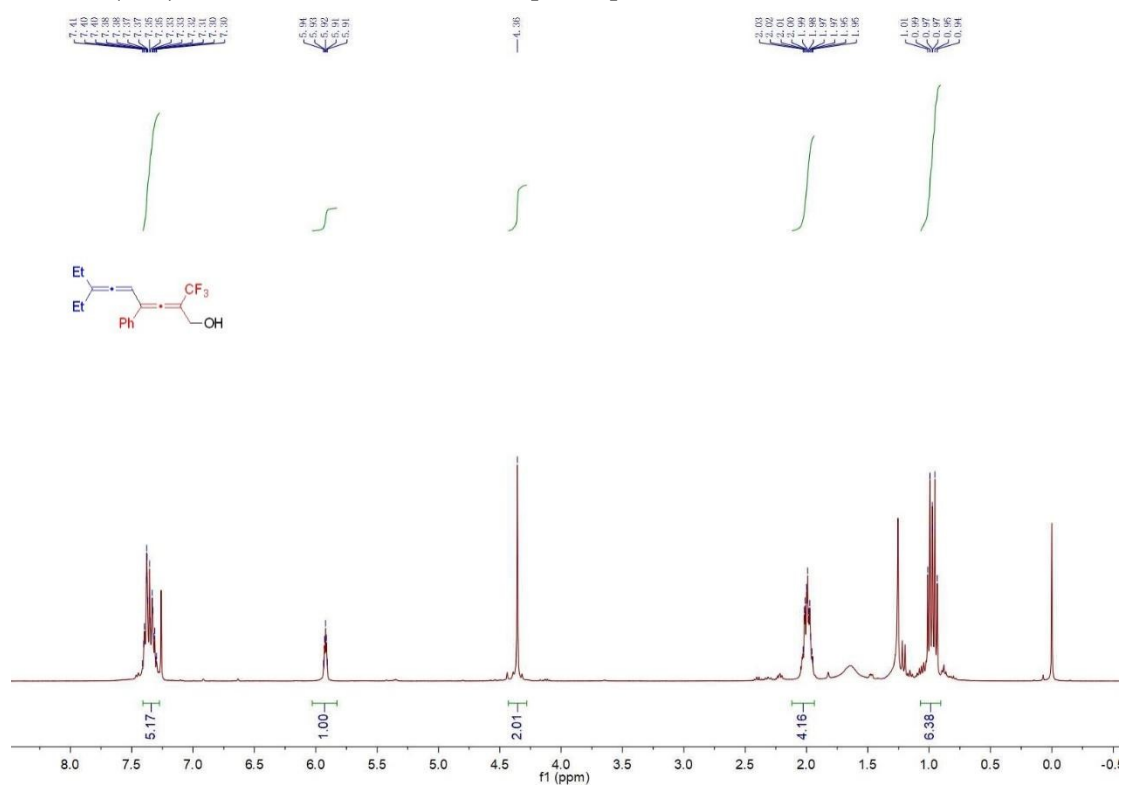

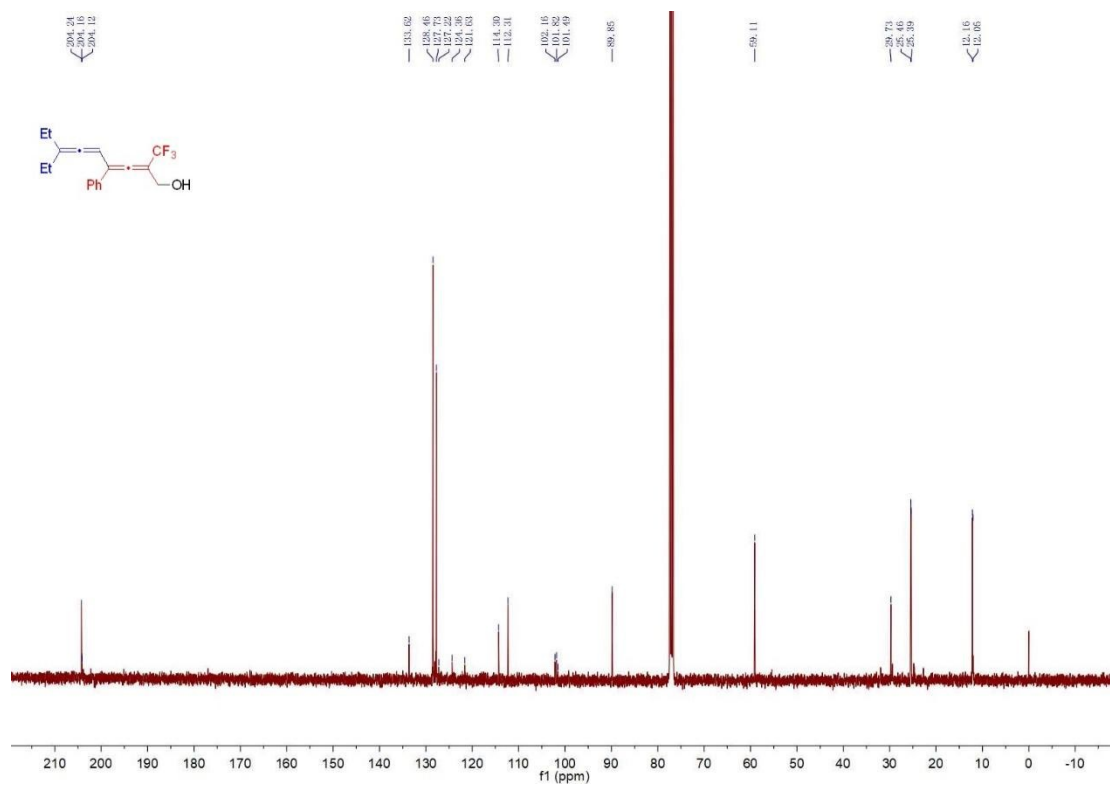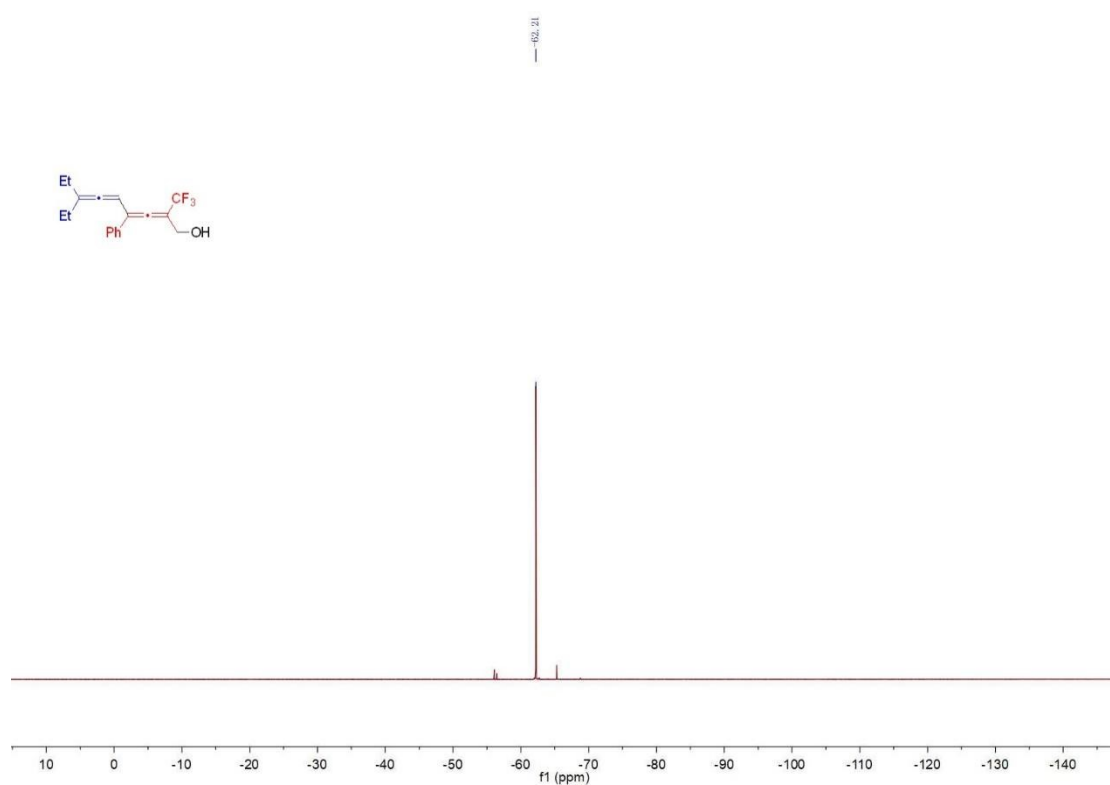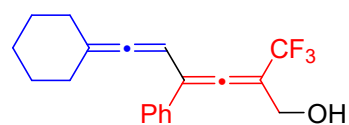

**6-cyclohexylidene-4-phenyl-2-(trifluoromethyl)hexa-2,3,5-trien-1-ol (3ab)**

After isolated and purified procedure, this compound was obtained 22.4 mg (70% yield)

as colorless oil. (Petroleum ether : EtOAc = 5 : 1)

$^1\text{H}$  NMR (400 MHz,  $\text{CDCl}_3$ )  $\delta$  7.41-7.30 (m, 5H), 5.77 (s, 1H), 4.36 (s, 2H), 2.24-1.98 (m, 4H), 1.73-1.47 (m, 4H), 1.44-1.33 (m, 2H).

$^{13}\text{C}$  NMR (101 MHz,  $\text{CDCl}_3$ )  $\delta$  204.3 (q,  $J = 4.2$  Hz), 202.3, 133.5, 128.4, 128.0, 127.2, 123.0 (q,  $J = 275.0$  Hz), 114.3, 106.4, 101.7 (q,  $J = 33.3$  Hz), 86.4, 59.1, 30.9, 30.8, 27.0, 26.9, 25.8.

$^{19}\text{F}$  NMR (376 MHz,  $\text{CDCl}_3$ )  $\delta$  -62.12.

HRMS (ESI) calculated for  $\text{C}_{19}\text{H}_{20}\text{F}_3\text{O}^+$   $[\text{M}+\text{H}]^+$  321.1461; found 321.1467.

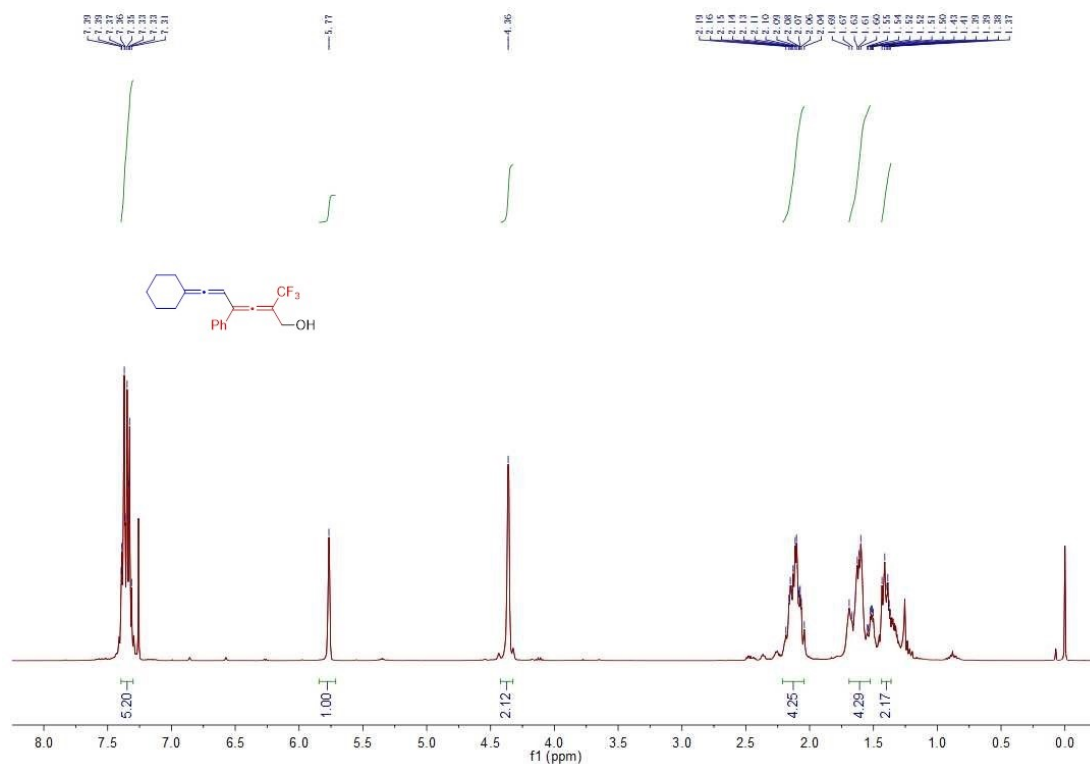

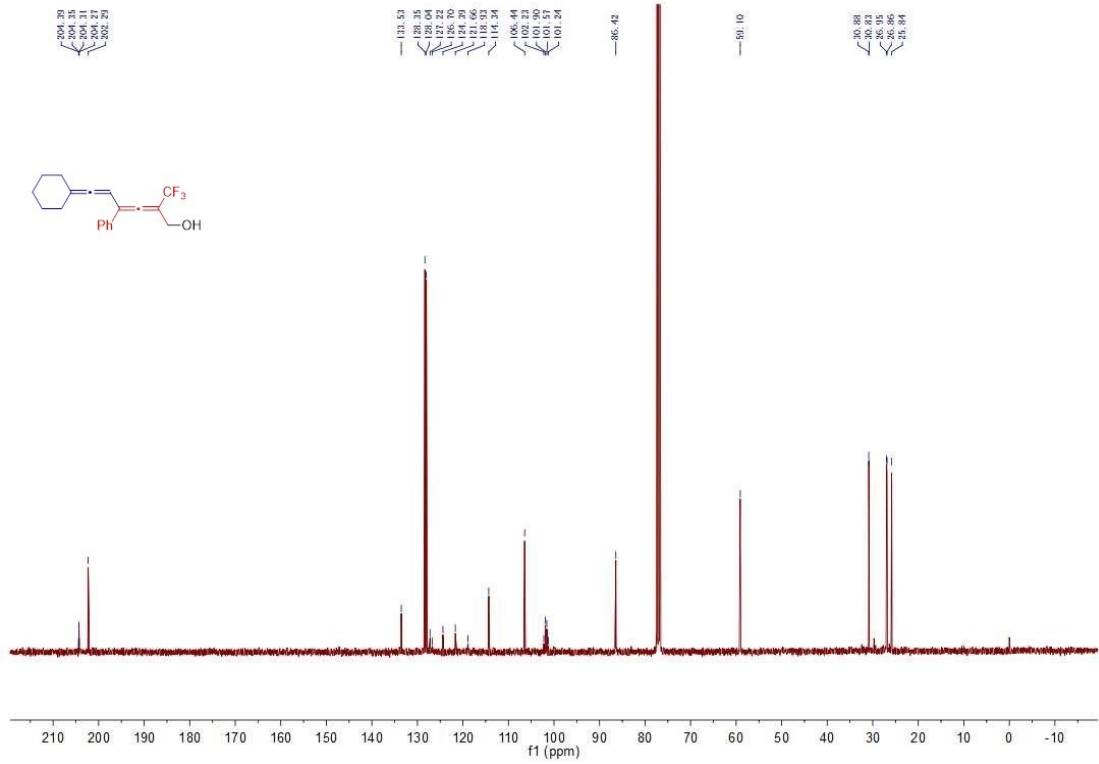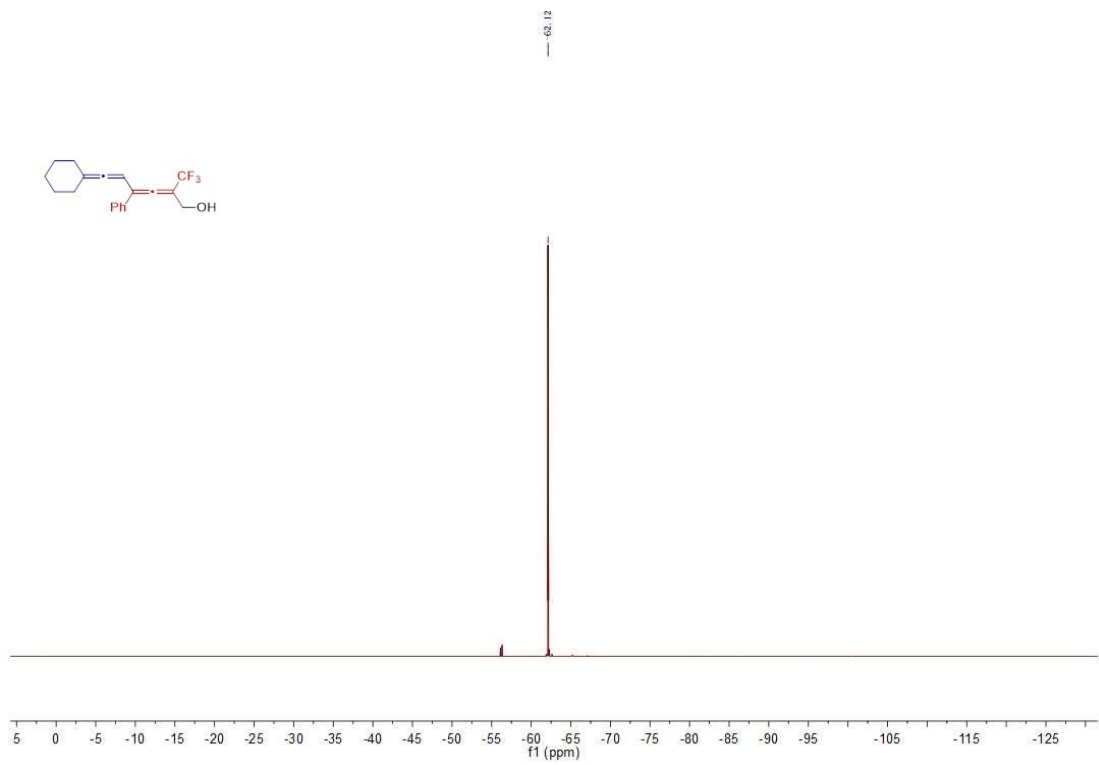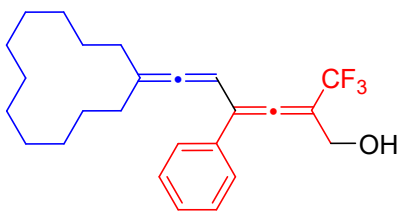



### 6-cyclododecylidene-4-phenyl-2-(trifluoromethyl)hexa-2,3,5-trien-1-ol (3ac)

After isolated and purified procedure, this compound was obtained 29.9 mg (74% yield) as colorless oil. (Petroleum ether : EtOAc = 5 : 1)

$^1\text{H}$  NMR (400 MHz,  $\text{CDCl}_3$ )  $\delta$  7.39-7.28 (m, 5H), 5.90-5.88 (m, 1H), 4.35 (s, 2H), 2.06-1.99 (m, 4H), 1.53-1.39 (m, 4H), 1.28 (s, 12H), 1.22-1.11 (m, 2H).

$^{13}\text{C}$  NMR (101 MHz,  $\text{CDCl}_3$ )  $\delta$  205.8, 204.3 (q,  $J = 4.2$  Hz), 133.7, 128.5, 127.9, 127.2, 123.0 (q,  $J = 275.0$  Hz), 114.2, 101.7 (q,  $J = 33.2$  Hz), 88.3, 59.1, 29.4, 29.2, 24.5, 24.5, 24.3, 24.2, 24.1, 24.1, 23.5, 23.4, 22.5.

$^{19}\text{F}$  NMR (376 MHz,  $\text{CDCl}_3$ )  $\delta$  -62.16.

HRMS (ESI) calculated for  $\text{C}_{25}\text{H}_{32}\text{F}_3\text{O}^+$   $[\text{M}+\text{H}]^+$  405.2400; found 405.2405.

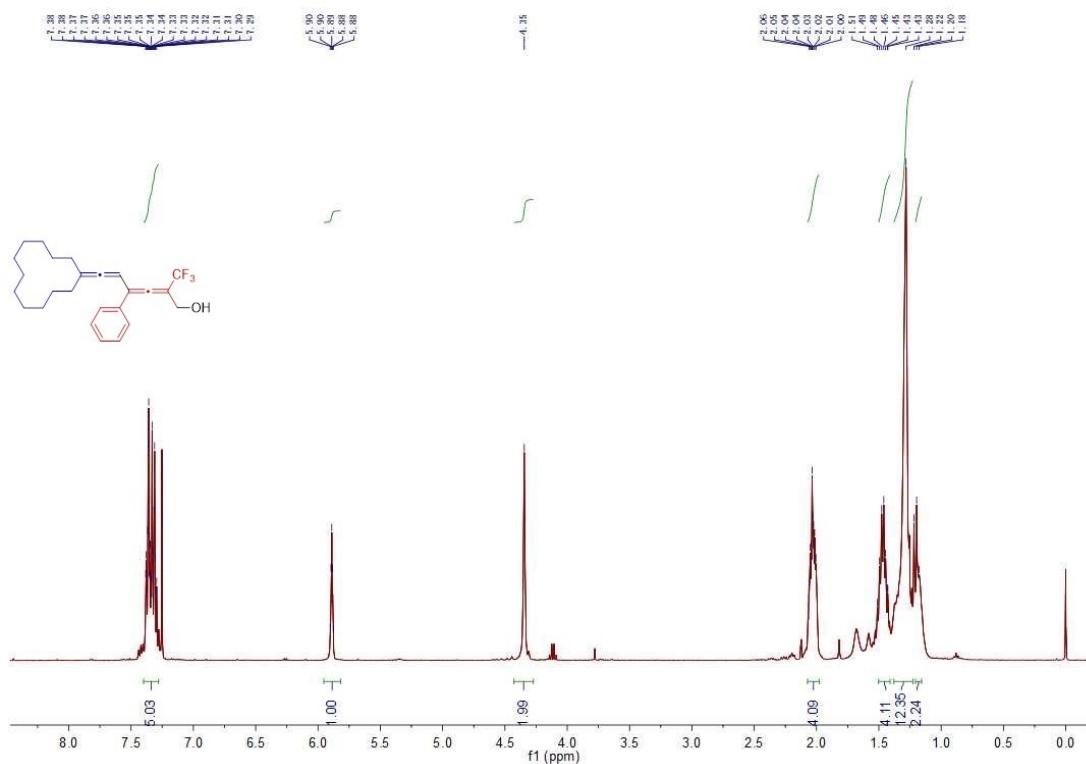

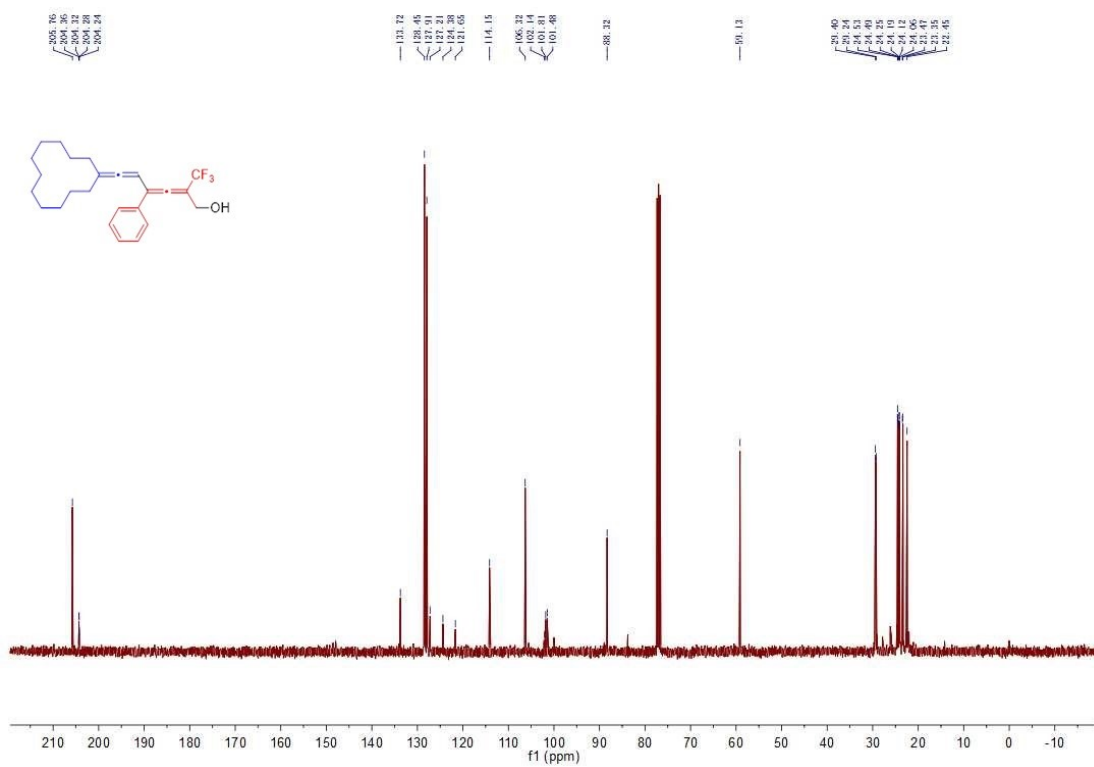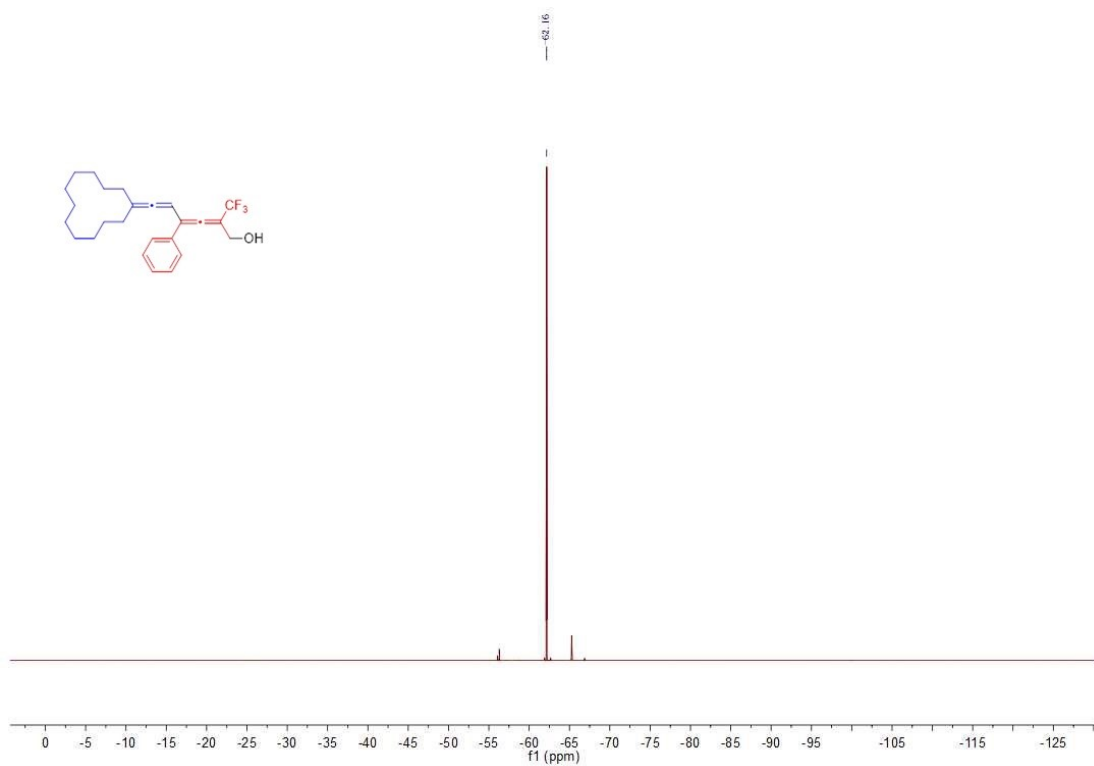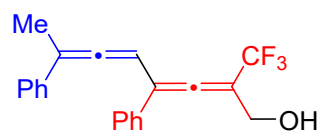

### 4,7-diphenyl-2-(trifluoromethyl)octa-2,3,5,6-tetraen-1-ol (3ad)

After isolated and purified procedure, this unstable compound was obtained (55% NMR)

yield) as colorless oil. (Petroleum ether : EtOAc = 5 : 1)

$^1\text{H}$  NMR (400 MHz,  $\text{CDCl}_3$ )  $\delta$  7.52-7.23 (m, 10H), 6.24 (s, 1H), 4.34 (d,  $J = 9.2$  Hz, 2H), 2.12 (dd,  $J = 10.0, 2.0$  Hz, 3H).

$^{13}\text{C}$  NMR (101 MHz,  $\text{CDCl}_3$ )  $\delta$  208.7, 208.6, 204.9 (dq,  $J = 7.5, 4.0$  Hz), 135.6, 135.6, 133.1, 133.0, 131.6, 128.8, 128.7, 128.6, 128.6, 128.4, 127.7, 127.7, 127.4, 122.9 (dq,  $J = 275.1, 2.4$  Hz), 113.1, 112.9, 105.0, 104.9, 102.3 (dq,  $J = 52.1, 27.6$  Hz), 90.4, 90.4, 59.1, 16.6, 16.6.

$^{19}\text{F}$  NMR (376 MHz,  $\text{CDCl}_3$ )  $\delta$  -62.10, -62.15.

HRMS (ESI) calculated for  $\text{C}_{21}\text{H}_{18}\text{F}_3\text{O}^+$   $[\text{M}+\text{H}]^+$  343.1304; found 343.1300.

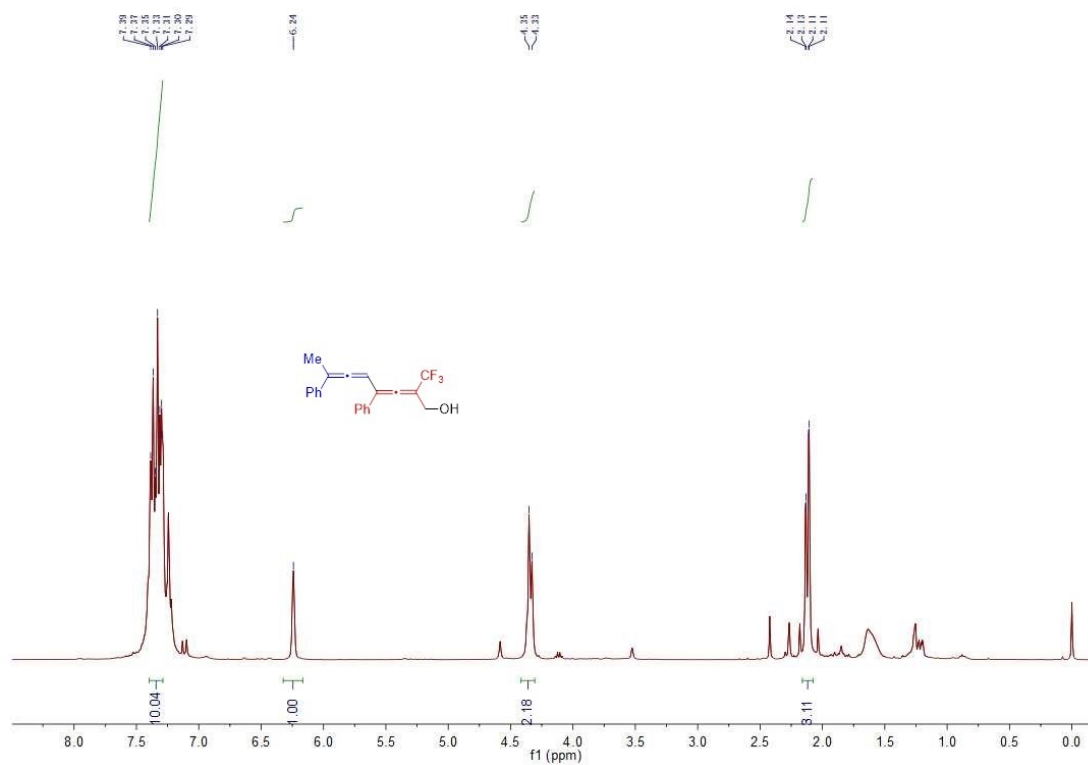

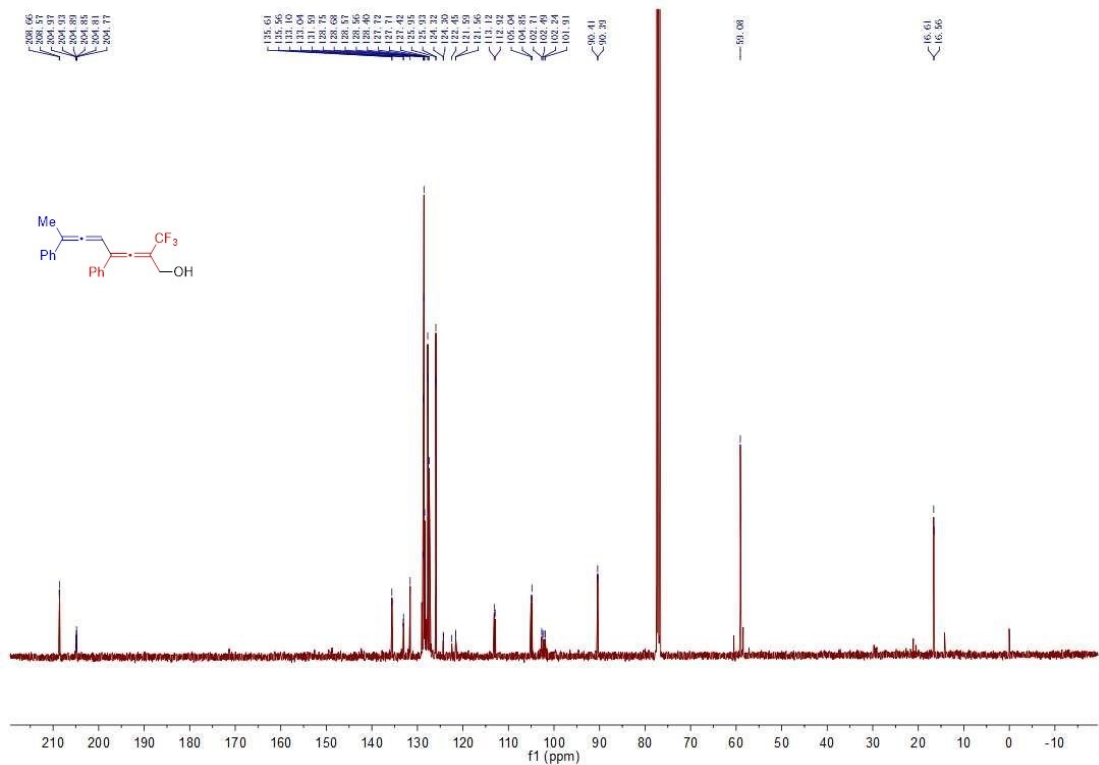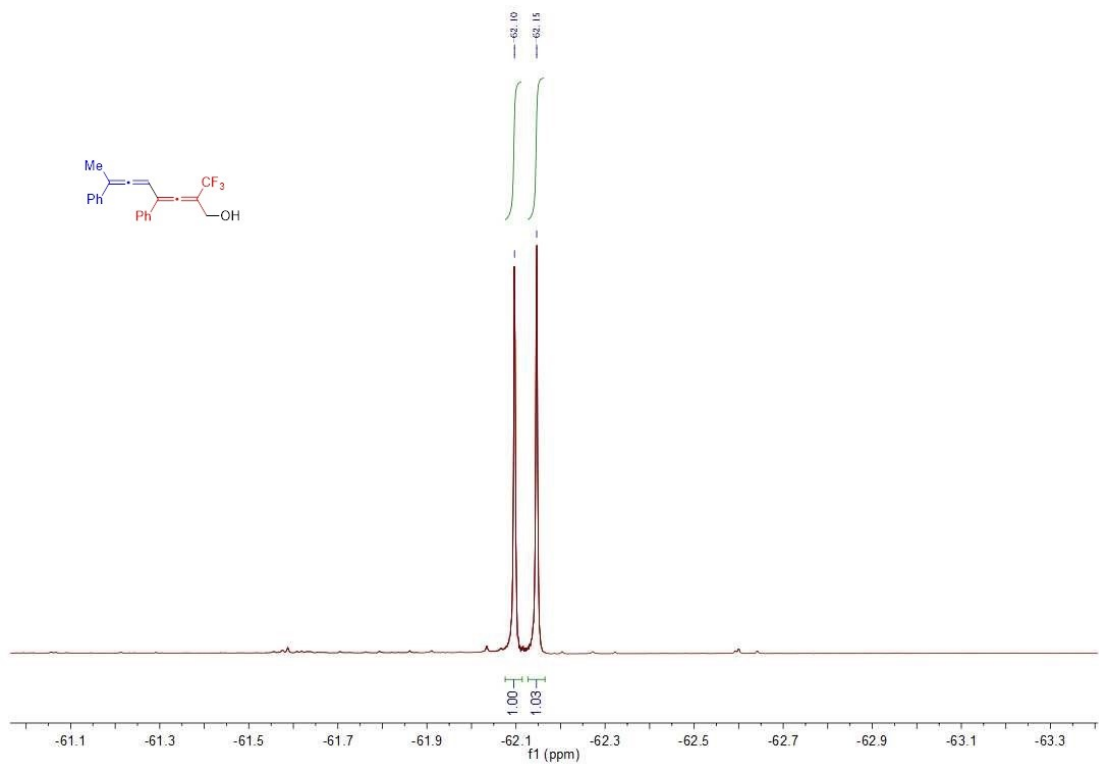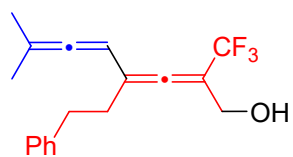

**7-methyl-4-phenethyl-2-(trifluoromethyl)octa-2,3,5,6-tetraen-1-ol (3r)**

After isolated and purified procedure, this compound was obtained 19.1 mg (62% yield)

as colorless oil. (Petroleum ether : EtOAc = 5 : 1)

$^1\text{H}$  NMR (400 MHz,  $\text{CDCl}_3$ )  $\delta$  7.35-7.28 (m, 2H), 7.25-7.15 (m, 3H), 5.60 (dt,  $J = 5.7, 2.8$  Hz, 1H), 4.00 (s, 2H), 2.80 (t,  $J = 7.4$  Hz, 2H), 2.51 (ddt,  $J = 40.0, 15.1, 7.4$  Hz, 2H), 1.79 (dd,  $J = 4.9, 2.9$  Hz, 6H).

$^{13}\text{C}$  NMR (101 MHz,  $\text{CDCl}_3$ )  $\delta$  203.8, 202.9 (q,  $J = 4.2$  Hz), 141.2, 128.5, 128.5, 126.3, 123.0 (q,  $J = 274.6$  Hz), 111.0, 100.8 (q,  $J = 33.1$  Hz), 100.3, 88.2, 58.9, 33.5, 31.1, 20.3, 20.3.

$^{19}\text{F}$  NMR (376 MHz,  $\text{CDCl}_3$ )  $\delta$  -62.43.

HRMS (ESI) calculated for  $\text{C}_{18}\text{H}_{20}\text{F}_3\text{O}^+$   $[\text{M}+\text{H}]^+$  309.1461; found 309.1464.

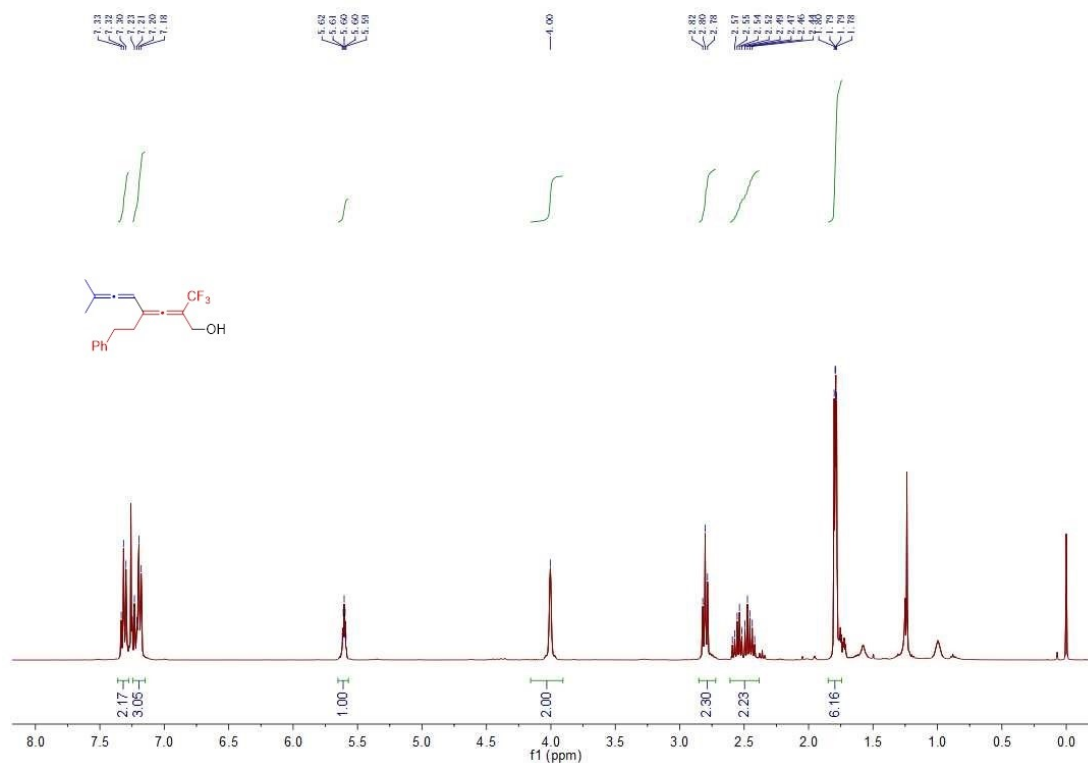

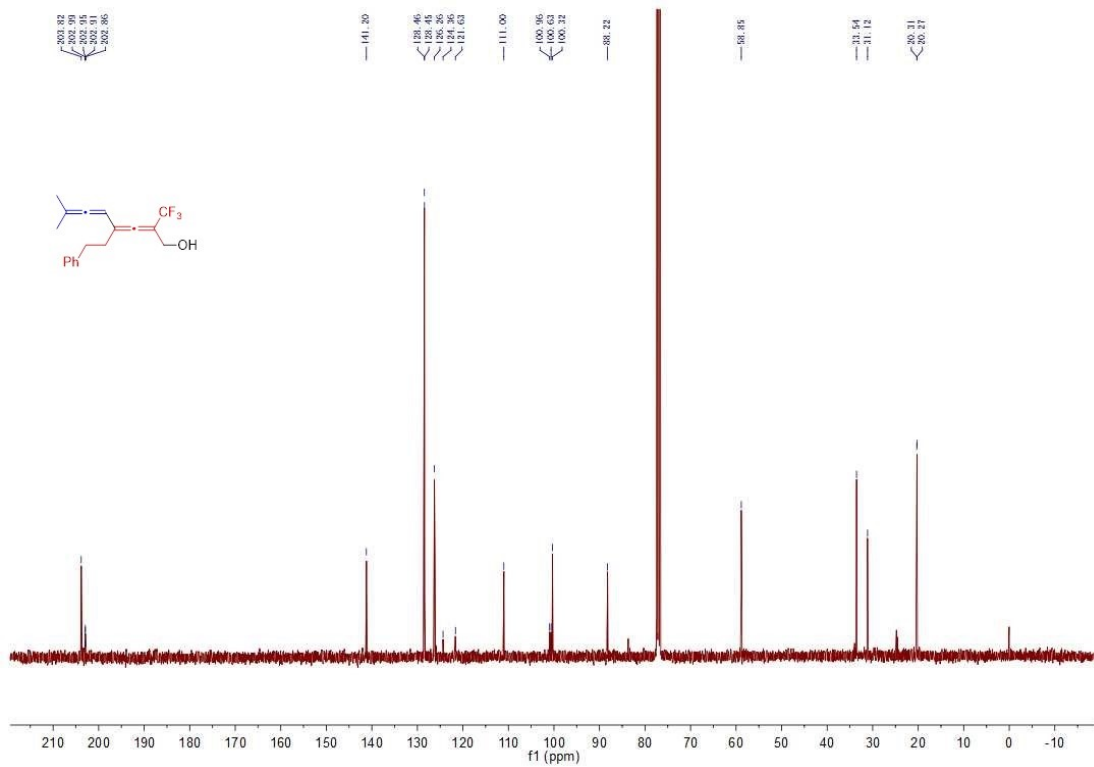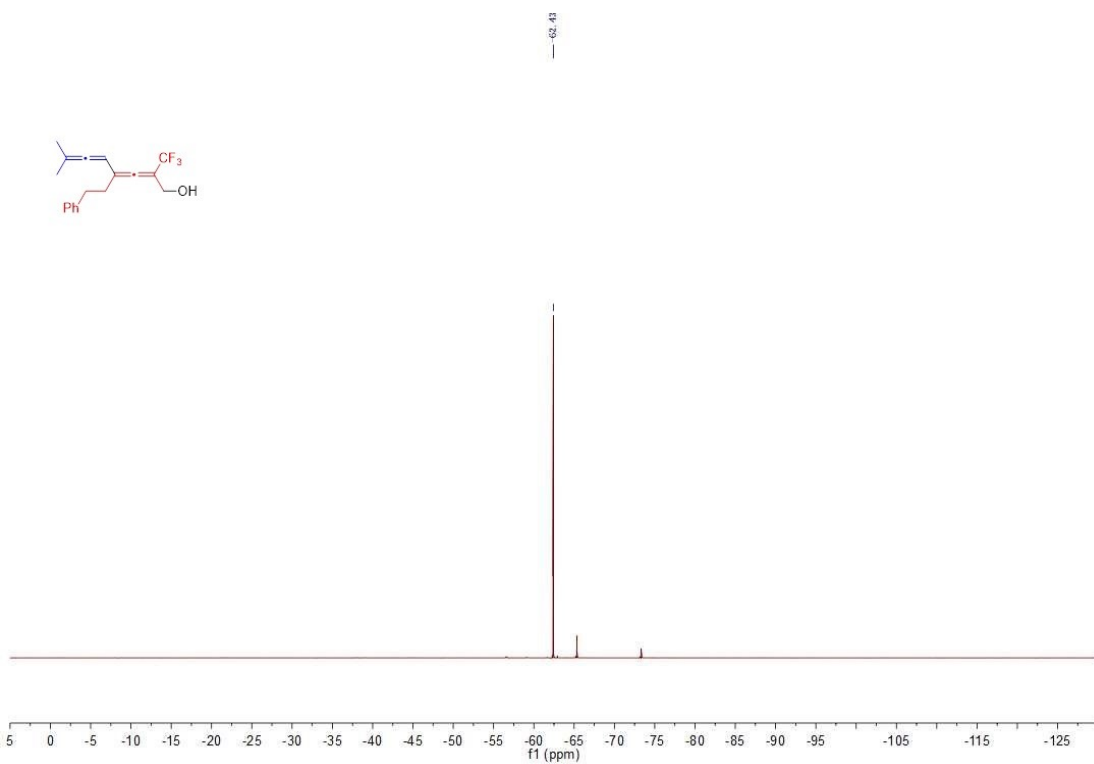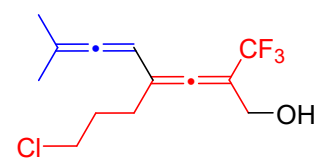

**4-(3-chloropropyl)-7-methyl-2-(trifluoromethyl)octa-2,3,5,6-tetraen-1-ol (3s)**  
 After isolated and purified procedure, this compound was obtained 18.2 mg (65% yield)

as colorless oil. (Petroleum ether : EtOAc = 5 : 1)

$^1\text{H}$  NMR (400 MHz,  $\text{CDCl}_3$ )  $\delta$  5.60 (dt,  $J = 5.7, 2.8$  Hz, 1H), 4.29 (s, 2H), 3.58 (t,  $J = 6.4$  Hz, 2H), 2.46-2.13 (m, 2H), 1.93 (dq,  $J = 12.8, 6.4$  Hz, 2H), 1.77 (t,  $J = 3.0$  Hz, 6H).

$^{13}\text{C}$  NMR (101 MHz,  $\text{CDCl}_3$ )  $\delta$  203.9, 202.8 (q,  $J = 4.1$  Hz), 123.0 (q,  $J = 274.7$  Hz), 101.0 (q,  $J = 33.1$  Hz), 100.9, 88.0, 59.0, 44.2, 30.4, 27.1, 20.2, 20.2.

$^{19}\text{F}$  NMR (376 MHz,  $\text{CDCl}_3$ )  $\delta$  -62.39.

HRMS (ESI) calculated for  $\text{C}_{13}\text{H}_{17}\text{ClF}_3\text{O}^+$   $[\text{M}+\text{H}]^+$  281.0915; found 281.0914.

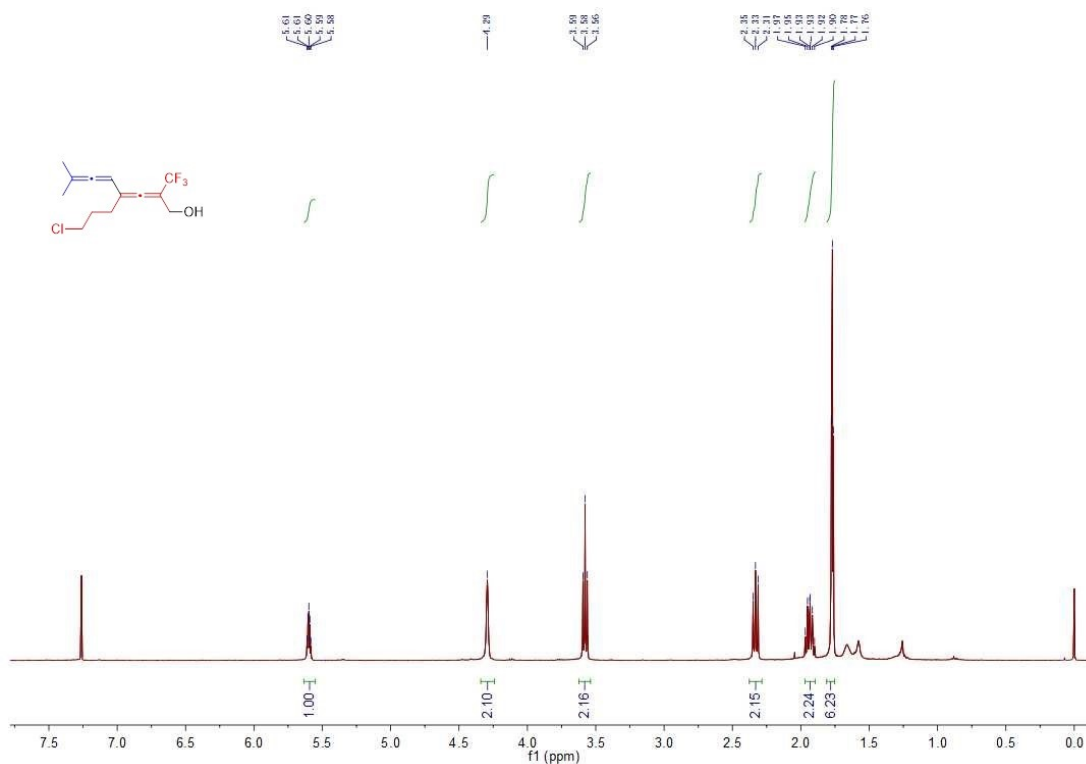

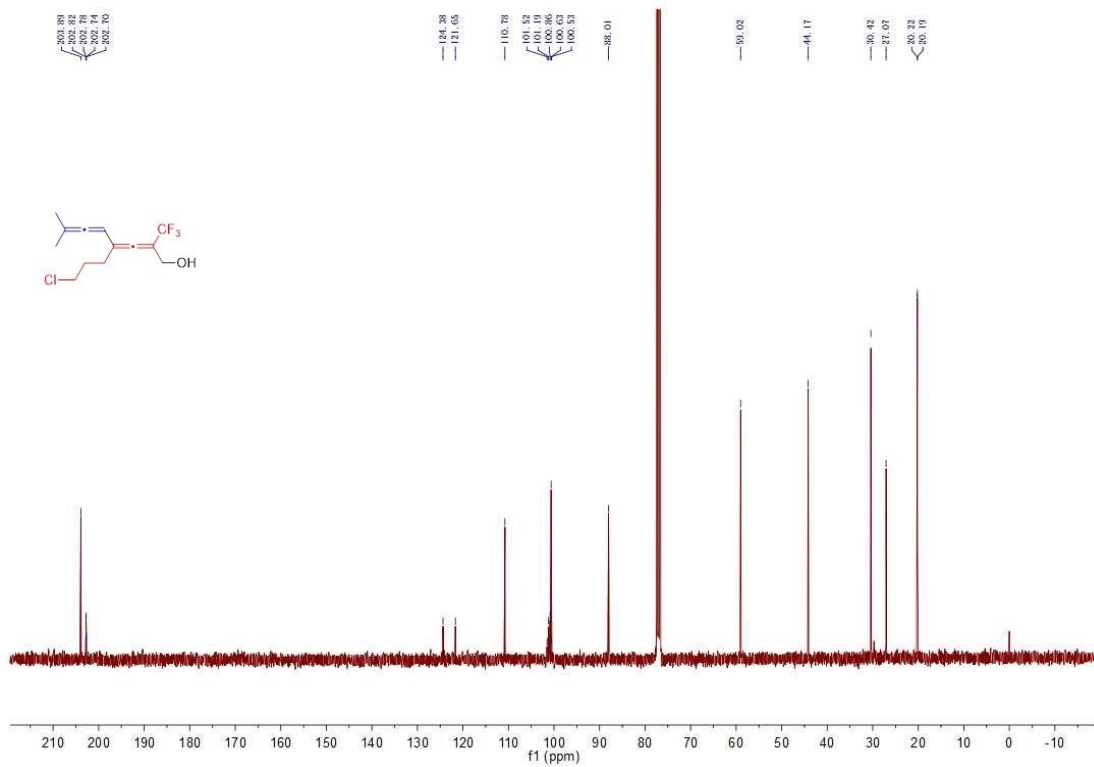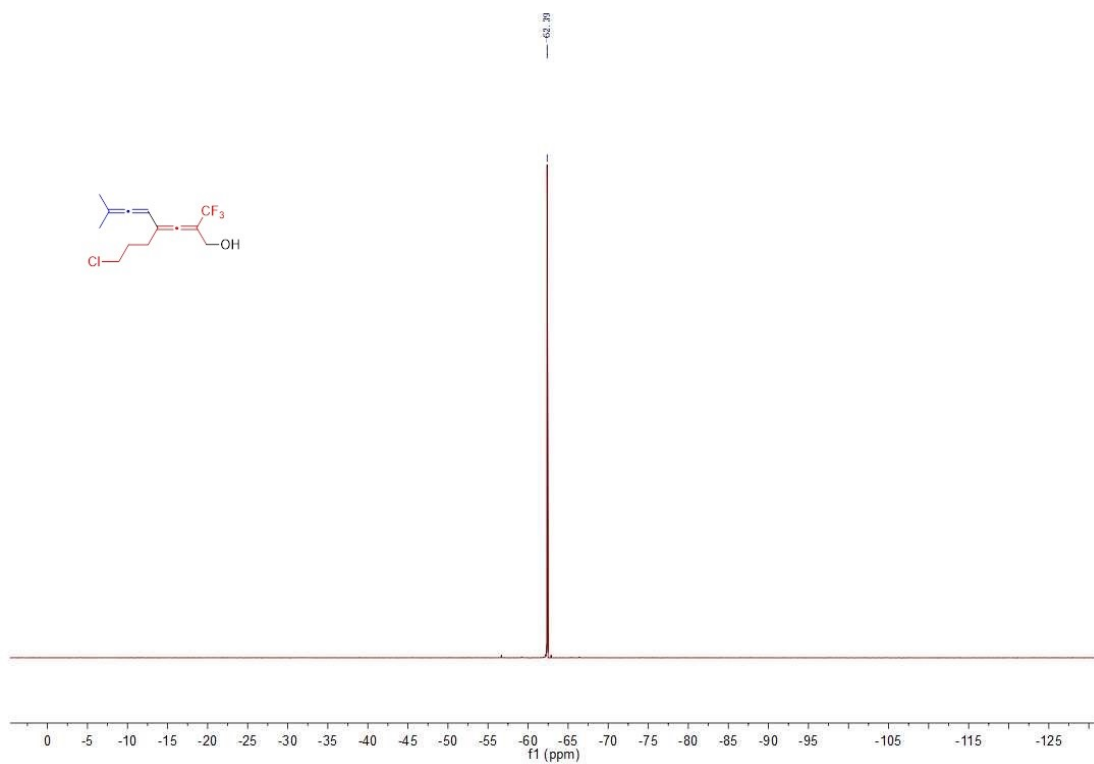

**4-(3-(benzyloxy)propyl)-7-methyl-2-(trifluoromethyl)octa-2,3,5,6-tetraen-1-ol (3t)**



After isolated and purified procedure, this compound was obtained 21.1 mg (60% yield) as colorless oil. (Petroleum ether : EtOAc = 5 : 1)

$^1\text{H}$  NMR (400 MHz,  $\text{CDCl}_3$ )  $\delta$  7.51-7.26 (m, 5H), 5.61 (dt,  $J = 5.7, 2.8$  Hz, 1H), 4.50 (d,  $J = 5.5$  Hz, 2H), 4.21 (s, 2H), 3.53 (dd,  $J = 9.6, 3.6$  Hz, 2H), 2.26 (td,  $J = 7.3, 2.6$  Hz, 2H), 1.82-1.76 (m, 2H), 1.75 (dd,  $J = 6.7, 3.8$  Hz, 6H).

$^{13}\text{C}$  NMR (101 MHz,  $\text{CDCl}_3$ )  $\delta$  203.8, 202.7 (q,  $J = 4.3$  Hz), 138.3, 128.4, 127.7, 127.7, 123.1 (q,  $J = 274.6$  Hz), 111.7, 101.1 (q,  $J = 33.1$  Hz), 100.2, 88.3, 72.7, 69.3, 58.8, 27.2, 26.7, 20.3, 20.2.

$^{19}\text{F}$  NMR (376 MHz,  $\text{CDCl}_3$ )  $\delta$  -62.36.

HRMS (ESI) calculated for  $\text{C}_{20}\text{H}_{24}\text{F}_3\text{O}_2^+$   $[\text{M}+\text{H}]^+$  353.1723; found 353.1725.

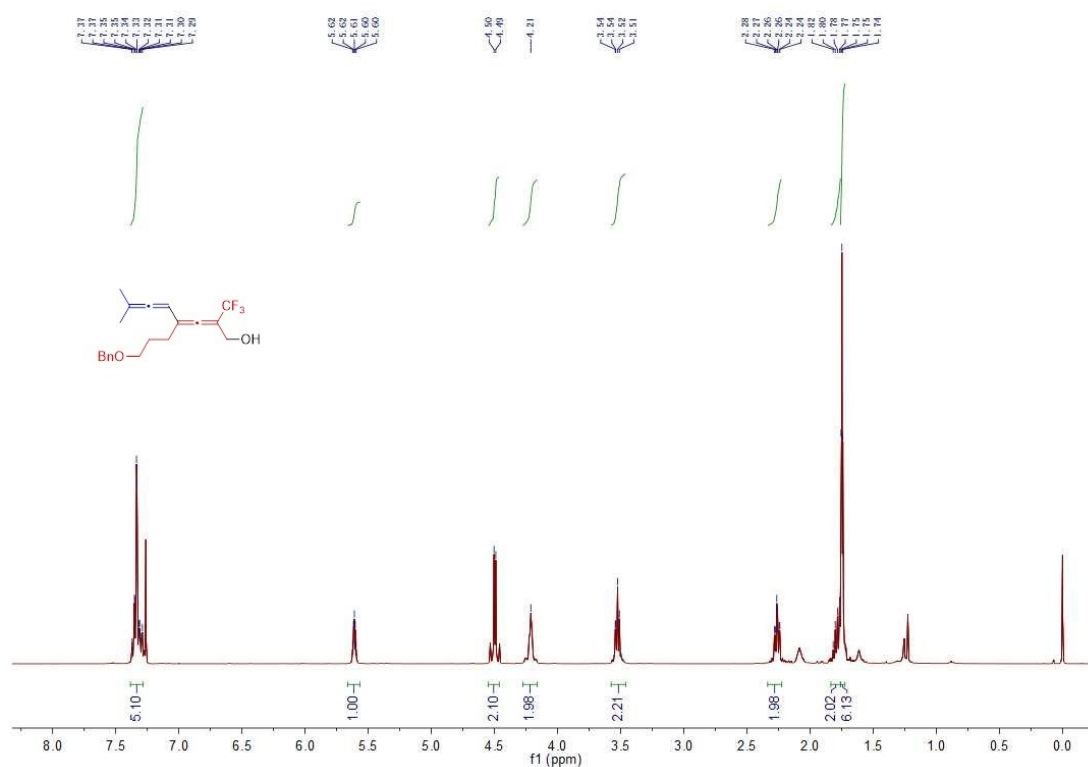

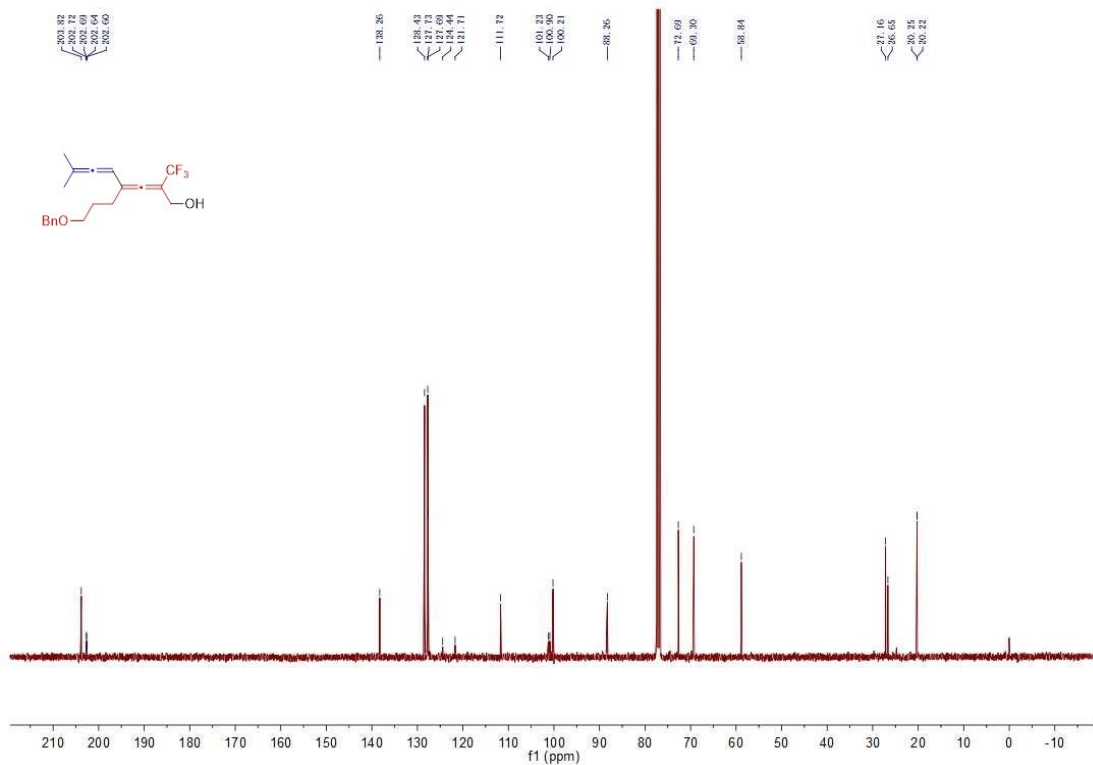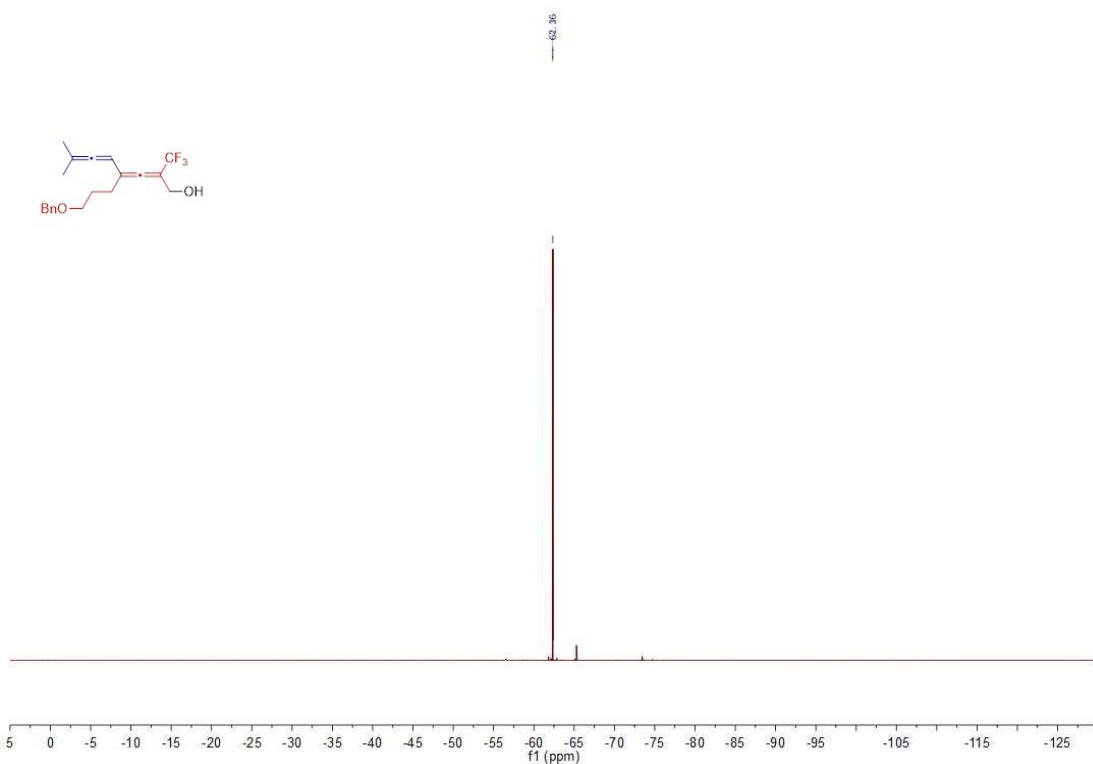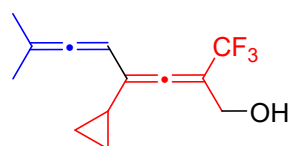

**4-cyclopropyl-7-methyl-2-(trifluoromethyl)octa-2,3,5,6-tetraen-1-ol (3u)**

After isolated and purified procedure, this compound was obtained 14.2 mg (58% yield)

as colorless oil. (Petroleum ether : EtOAc = 5 : 1)

$^1\text{H}$  NMR (400 MHz,  $\text{CDCl}_3$ )  $\delta$  5.63 (dt,  $J = 5.5, 2.7$  Hz, 1H), 4.25 (s, 2H), 1.78 (t,  $J = 2.5$  Hz, 6H), 1.42-1.30 (m, 1H), 0.84-0.67 (m, 2H), 0.52-0.22 (m, 2H).

$^{13}\text{C}$  NMR (101 MHz,  $\text{CDCl}_3$ )  $\delta$  204.4, 201.6 (q,  $J = 4.1$  Hz), 122.9 (q,  $J = 274.7$  Hz), 116.7, 102.5 (q,  $J = 33.1$  Hz), 100.2, 88.6, 59.0, 20.2, 20.2, 9.7, 7.8, 7.0.

$^{19}\text{F}$  NMR (376 MHz,  $\text{CDCl}_3$ )  $\delta$  -62.47.

HRMS (ESI) calculated for  $\text{C}_{13}\text{H}_{16}\text{F}_3\text{O}^+ [\text{M}+\text{H}]^+$  245.1148; found 245.1154.

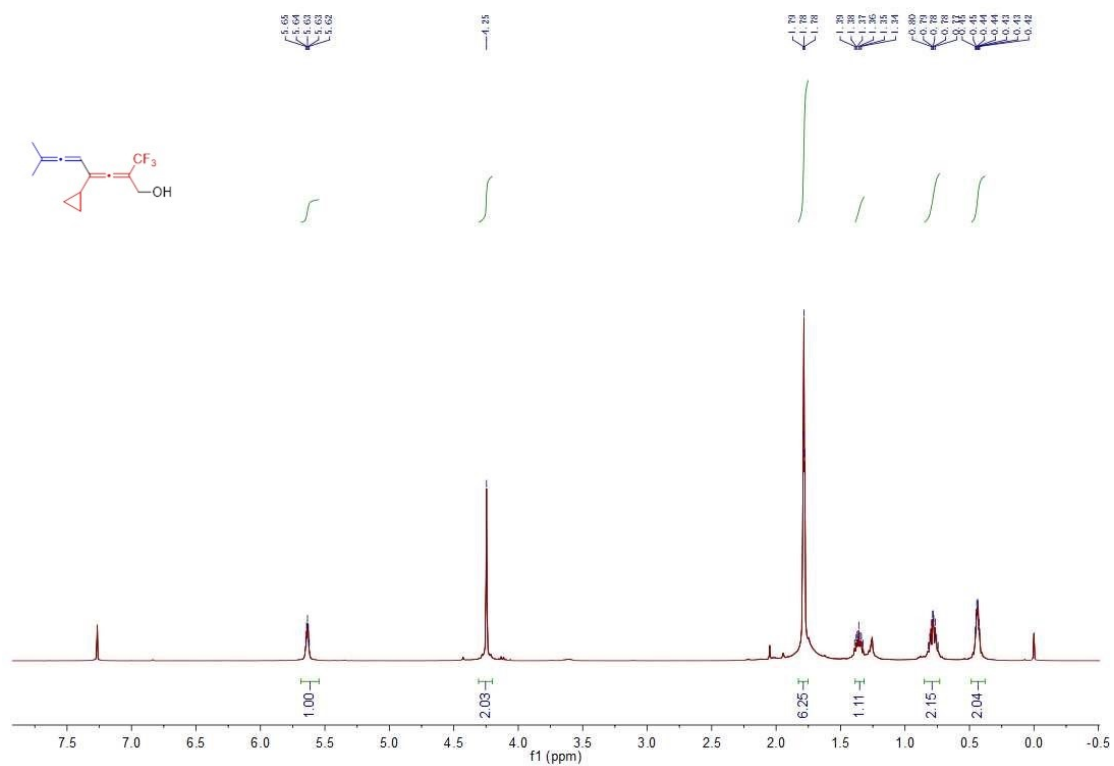





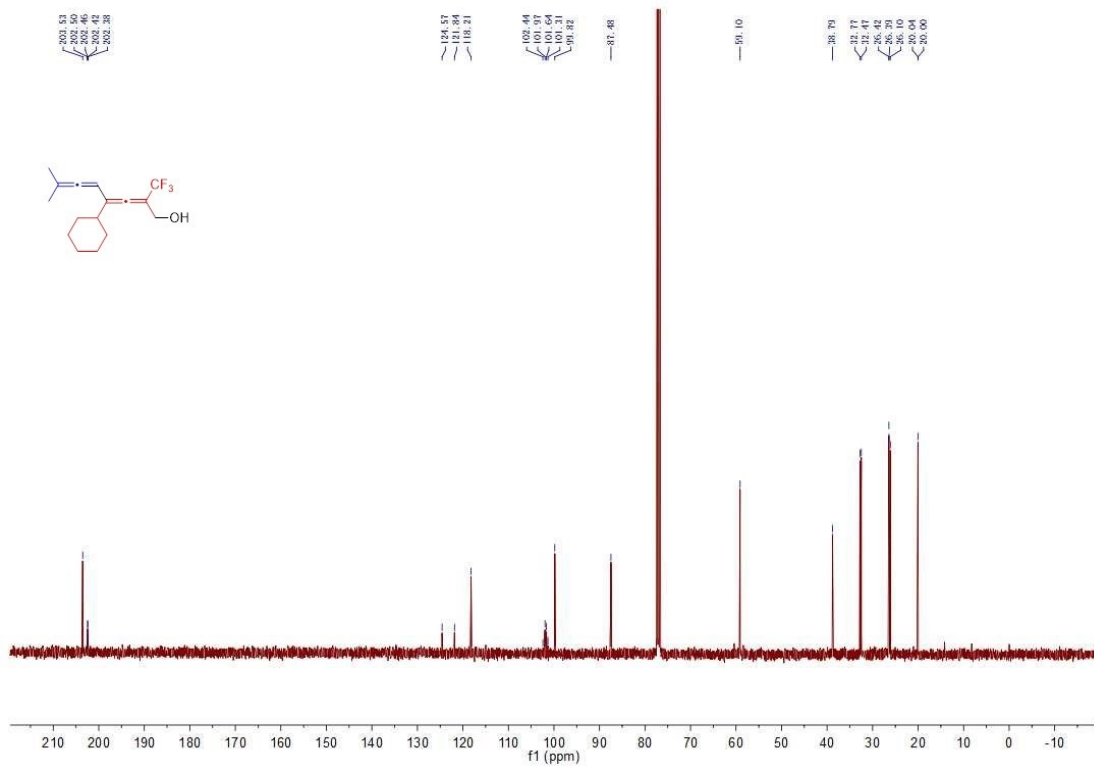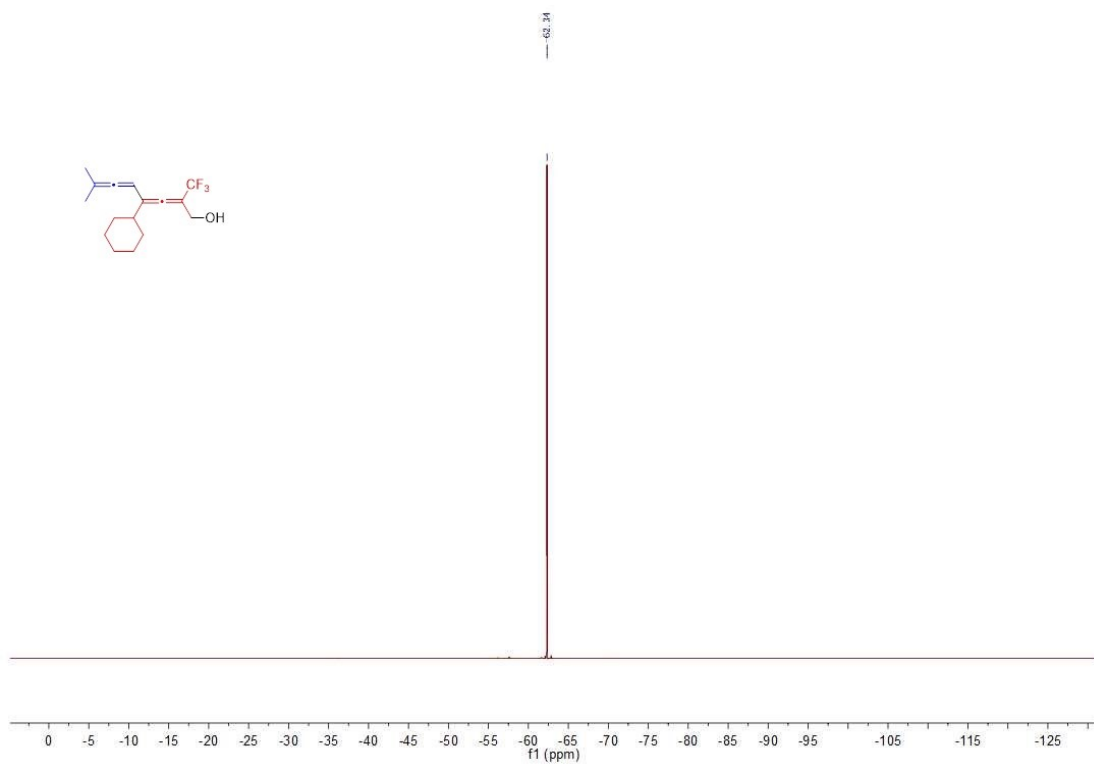

**4-(cyclohex-1-en-1-yl)-7-methyl-2-(trifluoromethyl)octa-2,3,5,6-tetraen-1-ol (3w)**

After isolated and purified procedure, this compound was obtained 17.0 mg (60% yield) as colorless oil. (Petroleum ether : EtOAc = 5 : 1)

$^1\text{H}$  NMR (400 MHz,  $\text{CDCl}_3$ )  $\delta$  6.04 (dd,  $J = 3.6, 2.0$  Hz, 1H), 5.54 (dt,  $J = 5.6, 2.8$  Hz, 1H), 4.28 (s, 2H), 2.26-2.07 (m, 2H), 2.07-1.94 (m, 2H), 1.72 (d,  $J = 2.6$  Hz, 6H), 1.69-1.64 (m, 2H), 1.63-1.56 (m, 2H).

$^{13}\text{C}$  NMR (101 MHz,  $\text{CDCl}_3$ )  $\delta$  204.5, 204.4 (q,  $J = 4.2$  Hz), 129.9, 128.0, 123.0 (q,  $J = 274.7$  Hz), 115.1, 102.0 (q,  $J = 33.2$  Hz), 98.2, 84.2, 59.1, 27.3, 26.0, 22.5, 22.0, 19.9, 19.8.

$^{19}\text{F}$  NMR (376 MHz,  $\text{CDCl}_3$ )  $\delta$  -62.47.

HRMS (ESI) calculated for  $\text{C}_{16}\text{H}_{20}\text{F}_3\text{O}^+$   $[\text{M}+\text{H}]^+$  285.1461; found 285.1466.

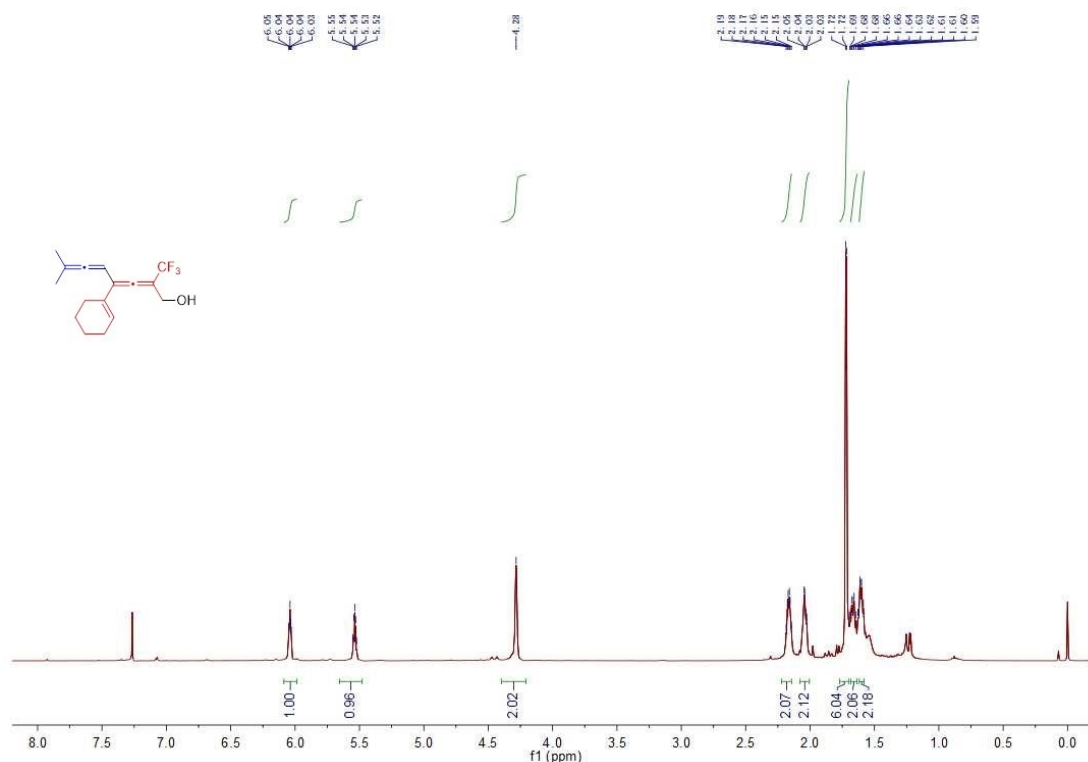

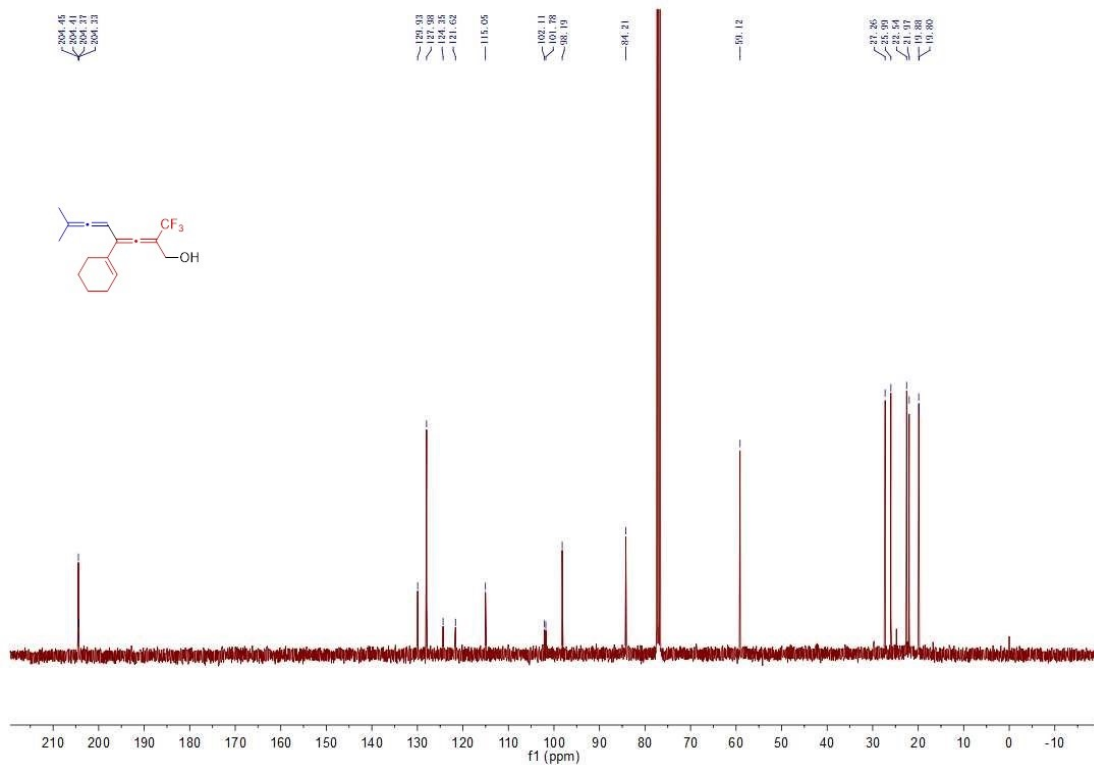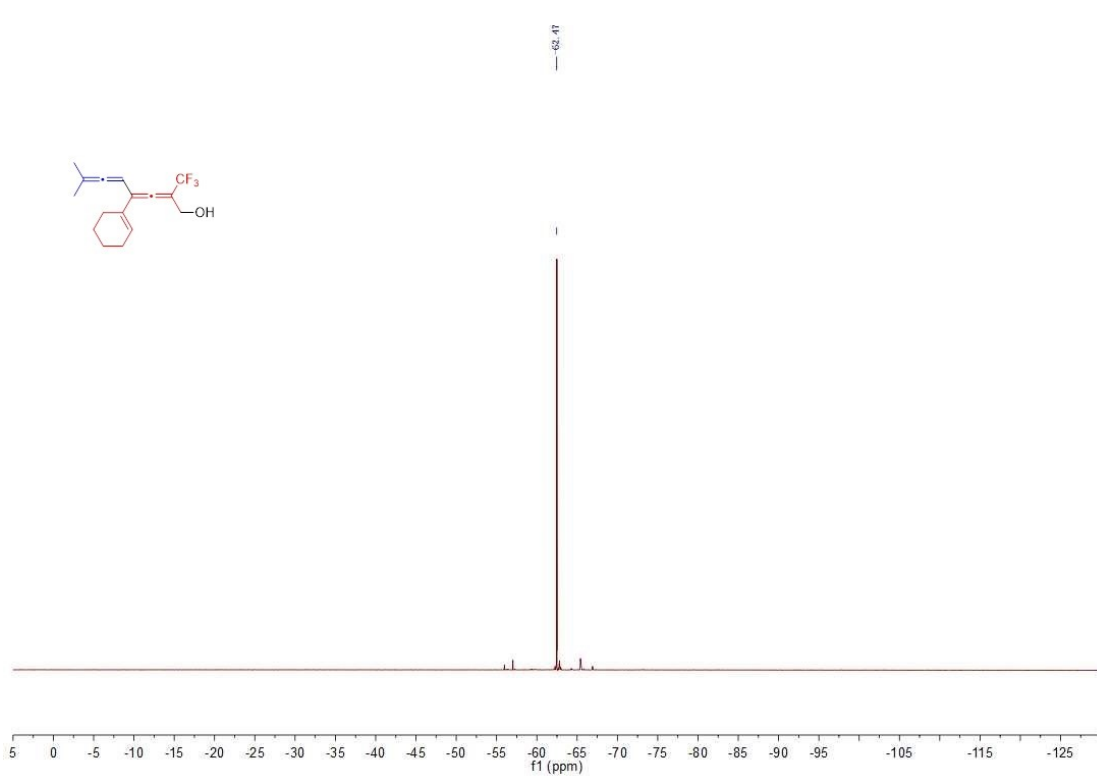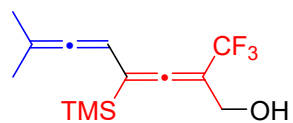

**7-methyl-2-(trifluoromethyl)-4-(trimethylsilyl)octa-2,3,5,6-tetraen-1-ol (3x)**  
 After isolated and purified procedure, this compound was obtained 6.9 mg (25% yield)



as colorless oil. (Petroleum ether : EtOAc = 5 : 1)

$^1\text{H}$  NMR (400 MHz,  $\text{CDCl}_3$ )  $\delta$  5.69 (dt,  $J = 5.7, 2.9$  Hz, 1H), 4.27 (d,  $J = 6.5$  Hz, 2H), 1.74 (s, 8H), 0.16 (s, 9H).

$^{13}\text{C}$  NMR (101 MHz,  $\text{CDCl}_3$ )  $\delta$  207.6, 205.4 (q,  $J = 3.5$  Hz), 106.0, 101.6 (q,  $J = 20.7$  Hz), 99.7, 87.7, 61.0, 31.3, 21.8, 21.8, 0.00.

$^{19}\text{F}$  NMR (376 MHz,  $\text{CDCl}_3$ )  $\delta$  -61.25.

HRMS (ESI) calculated for  $\text{C}_{13}\text{H}_{20}\text{F}_3\text{OSi}^+ [\text{M}+\text{H}]^+$  277.1230; found 277.1225.

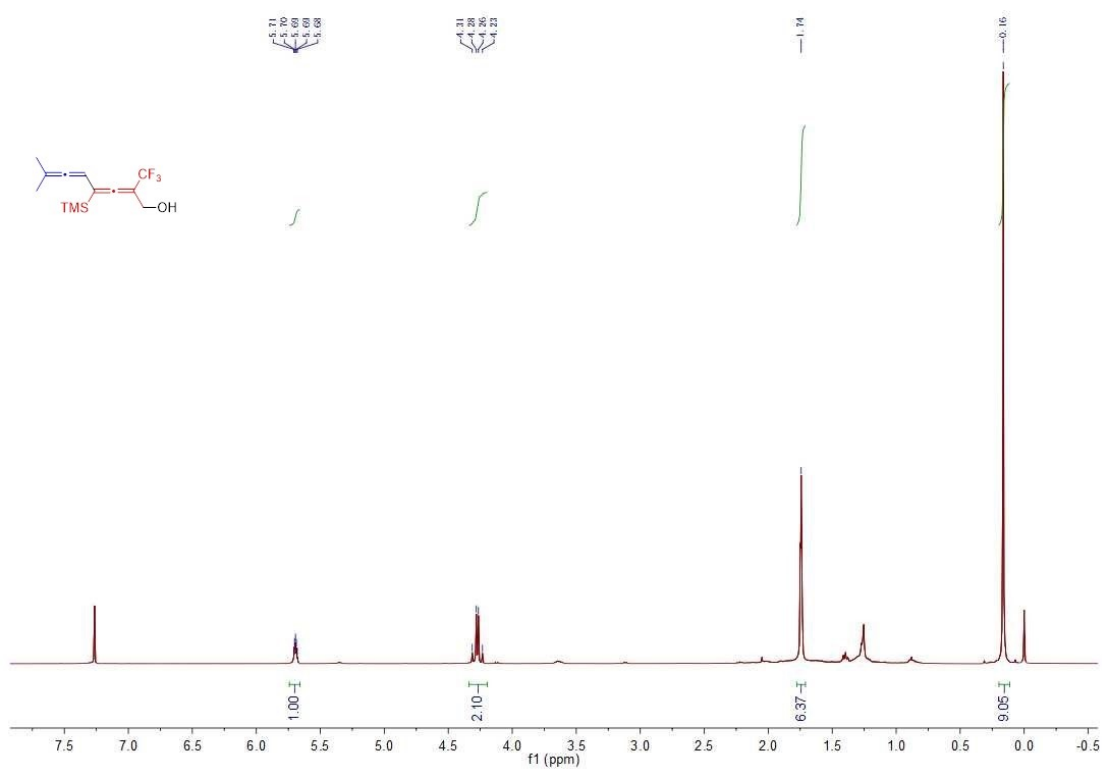

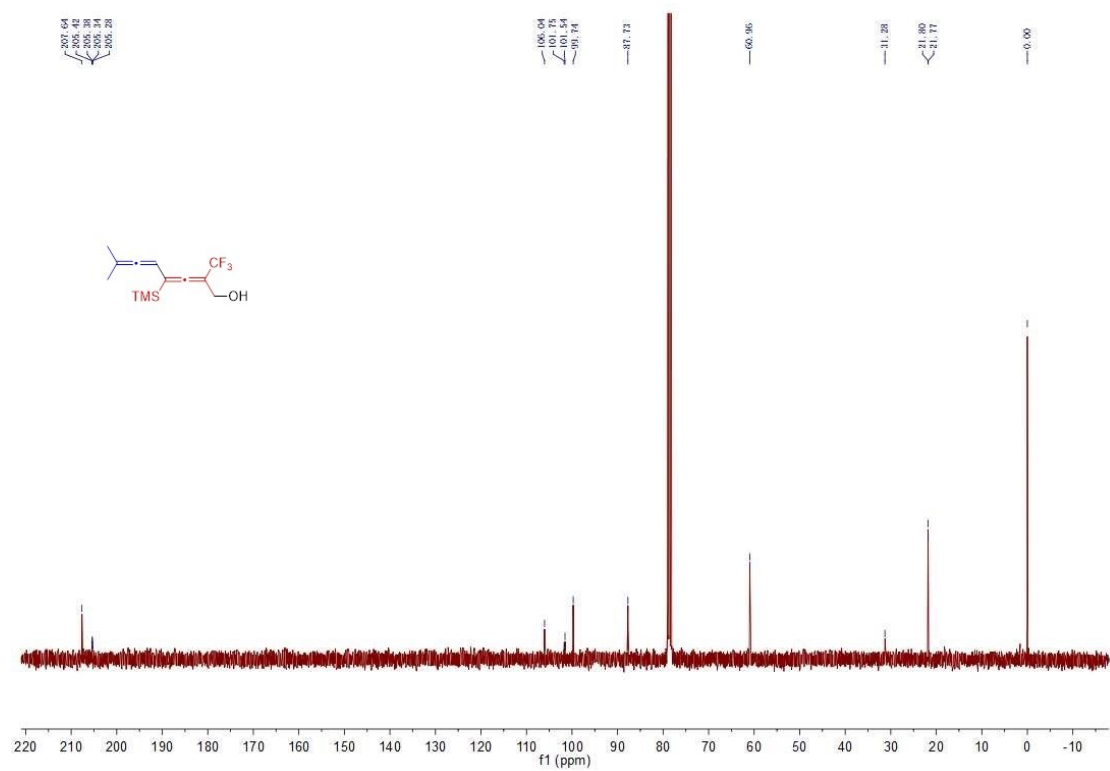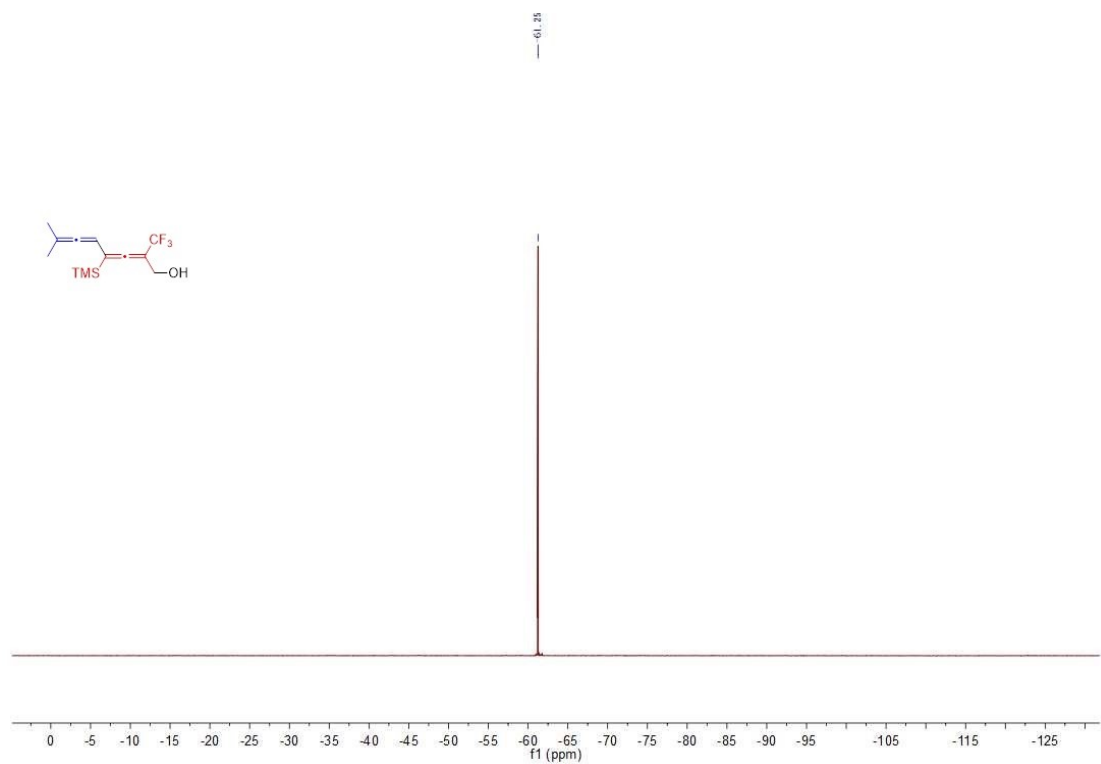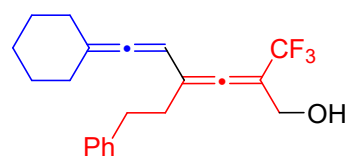

**6-cyclohexylidene-4-phenethyl-2-(trifluoromethyl)hexa-2,3,5-trien-1-ol (3ra)**

After isolated and purified procedure, this compound was obtained 22.3 mg (64% yield)

as colorless oil. (Petroleum ether : EtOAc = 5 : 1)

$^1\text{H}$  NMR (400 MHz,  $\text{CDCl}_3$ )  $\delta$  7.31 (dd,  $J = 10.1, 4.5$  Hz, 2H), 7.25-7.10 (m, 3H), 5.99-5.33 (m, 1H), 3.98 (d,  $J = 5.6$  Hz, 2H), 2.82 (t,  $J = 7.3$  Hz, 2H), 2.54 (ddt,  $J = 29.8, 14.8, 7.2$  Hz, 2H), 2.30-2.09 (m, 4H), 1.73-1.41 (m, 6H).

$^{13}\text{C}$  NMR (101 MHz,  $\text{CDCl}_3$ )  $\delta$  203.0 (q,  $J = 4.2$  Hz), 200.5, 141.2, 128.5, 128.4, 126.3, 123.0 (q,  $J = 274.7$  Hz), 110.9, 107.3, 100.7 (q,  $J = 33.0$  Hz), 87.9, 83.8, 58.9, 33.5, 31.3, 31.2, 27.3, 25.9, 24.9, 24.6.

$^{19}\text{F}$  NMR (376 MHz,  $\text{CDCl}_3$ )  $\delta$  -62.42.

HRMS (ESI) calculated for  $\text{C}_{21}\text{H}_{24}\text{F}_3\text{O}^+$   $[\text{M}+\text{H}]^+$  349.1774; found 349.1771.

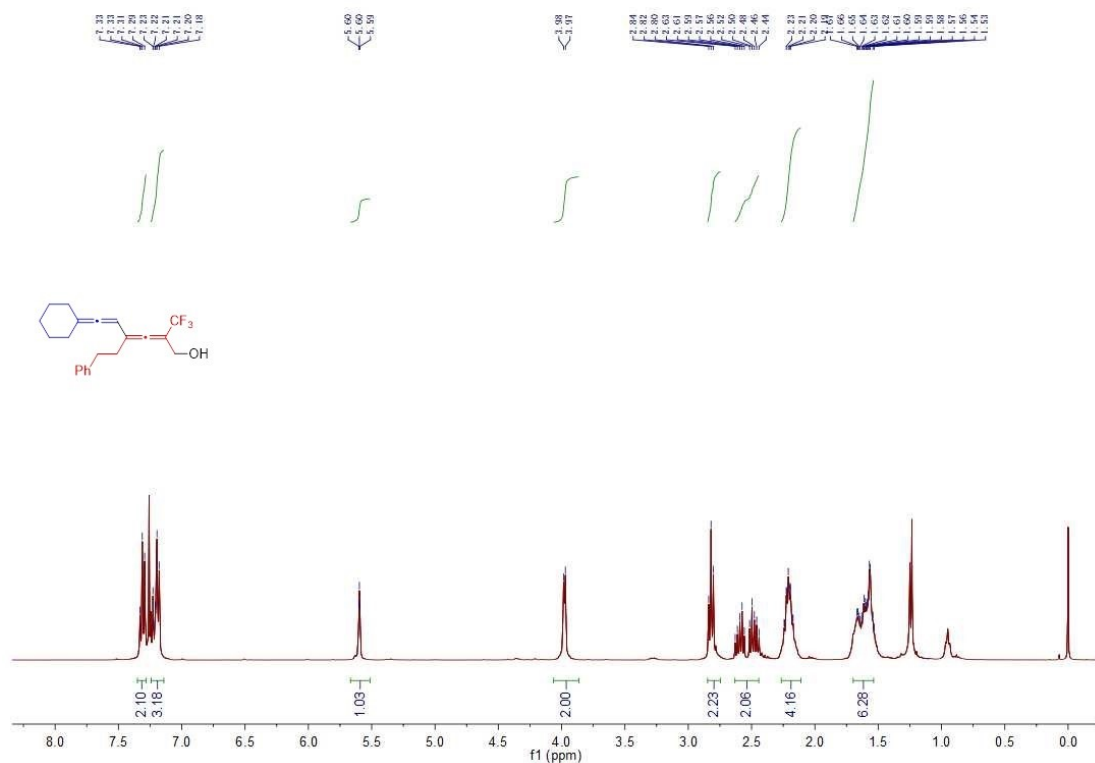

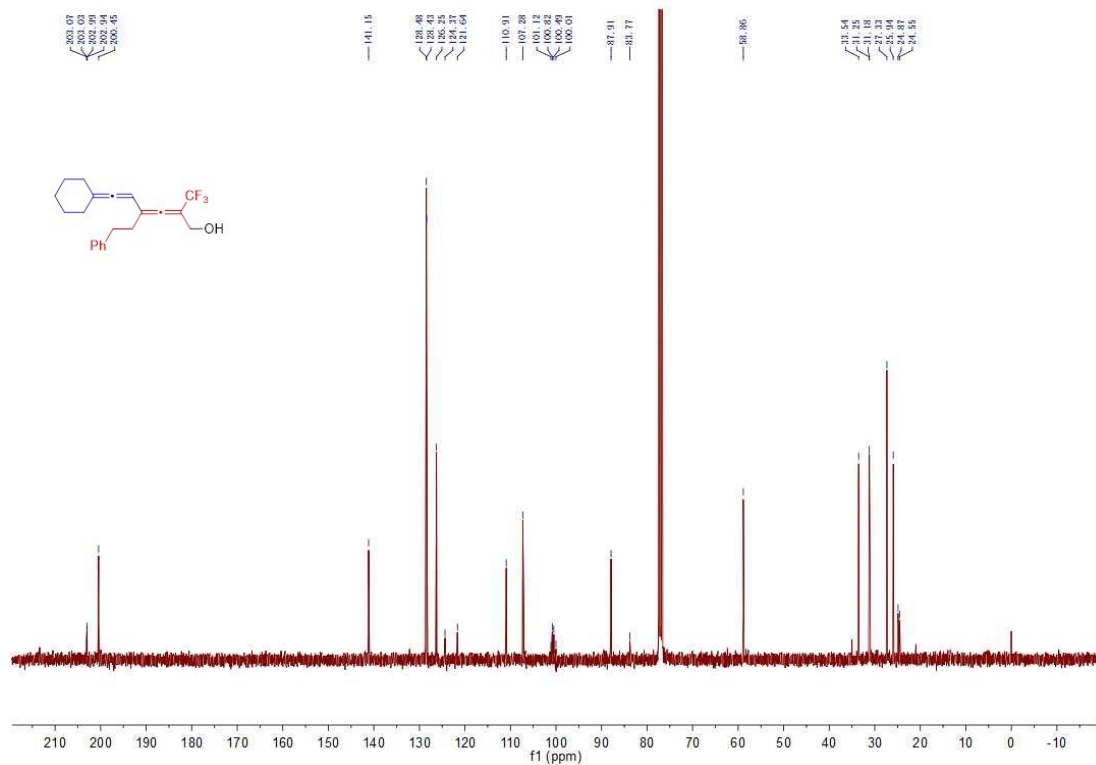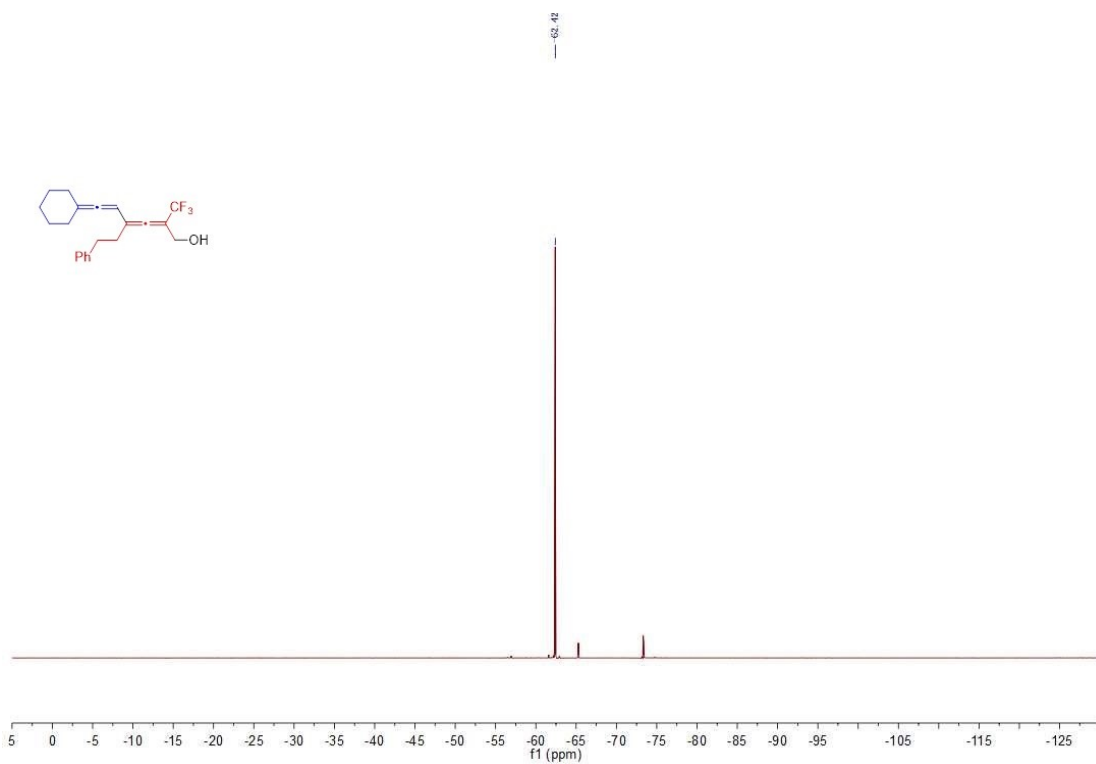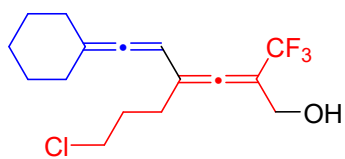

**7-chloro-4-(2-cyclohexylidenevinyl)-2-(trifluoromethyl)hepta-2,3-dien-1-ol (3sa)**  
 After isolated and purified procedure, this compound was obtained 21.1 mg (66% yield)

as colorless oil. (Petroleum ether : EtOAc = 5 : 1)

$^1\text{H}$  NMR (400 MHz,  $\text{CDCl}_3$ )  $\delta$  5.77-5.35 (m, 1H), 4.30 (d,  $J = 5.1$  Hz, 2H), 3.59 (t,  $J = 6.4$  Hz, 2H), 2.42-2.31 (m, 2H), 2.26-2.11 (m, 4H), 2.02-1.85 (m, 2H), 1.76-1.10 (m, 6H).

$^{13}\text{C}$  NMR (101 MHz,  $\text{CDCl}_3$ )  $\delta$  202.8 (q,  $J = 4.1$  Hz), 200.5, 123.0 (q,  $J = 274.7$  Hz), 110.8, 107.5, 100.9 (q,  $J = 33.1$  Hz), 87.7, 87.7, 59.0, 44.3, 31.1, 31.1, 30.4, 27.3, 25.9.

$^{19}\text{F}$  NMR (376 MHz,  $\text{CDCl}_3$ )  $\delta$  -62.35.

HRMS (ESI) calculated for  $\text{C}_{16}\text{H}_{21}\text{ClF}_3\text{O}^+$   $[\text{M}+\text{H}]^+$  321.1228; found 321.1221.

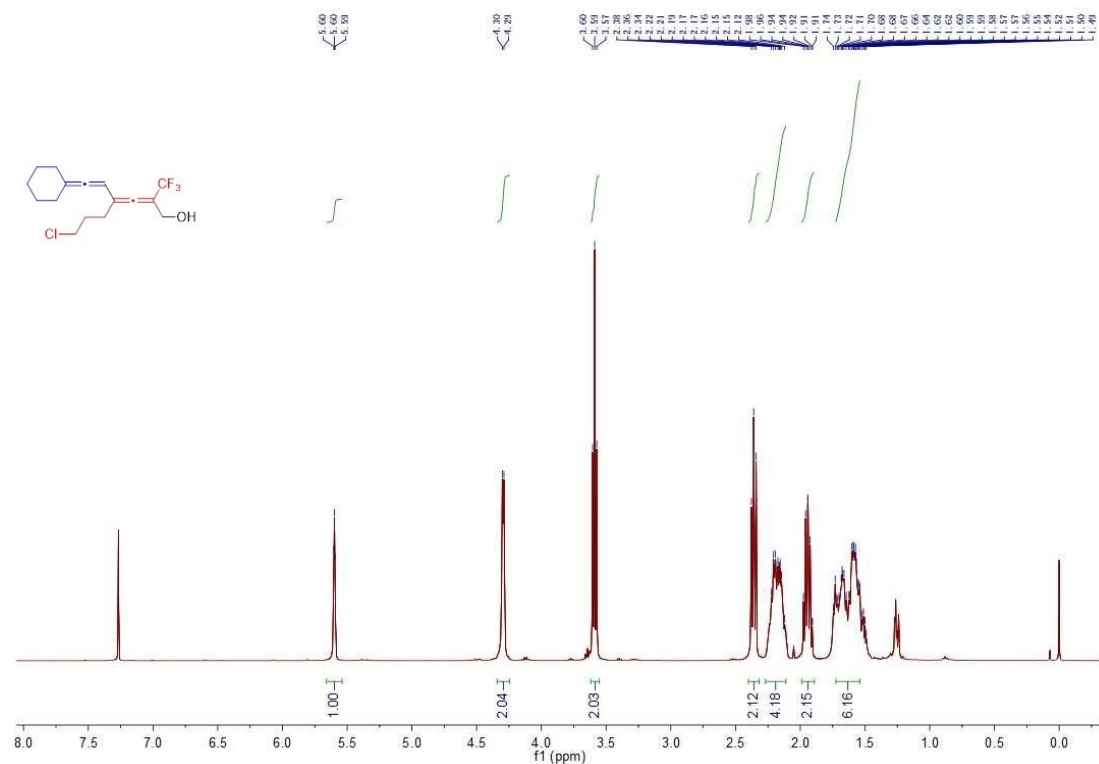

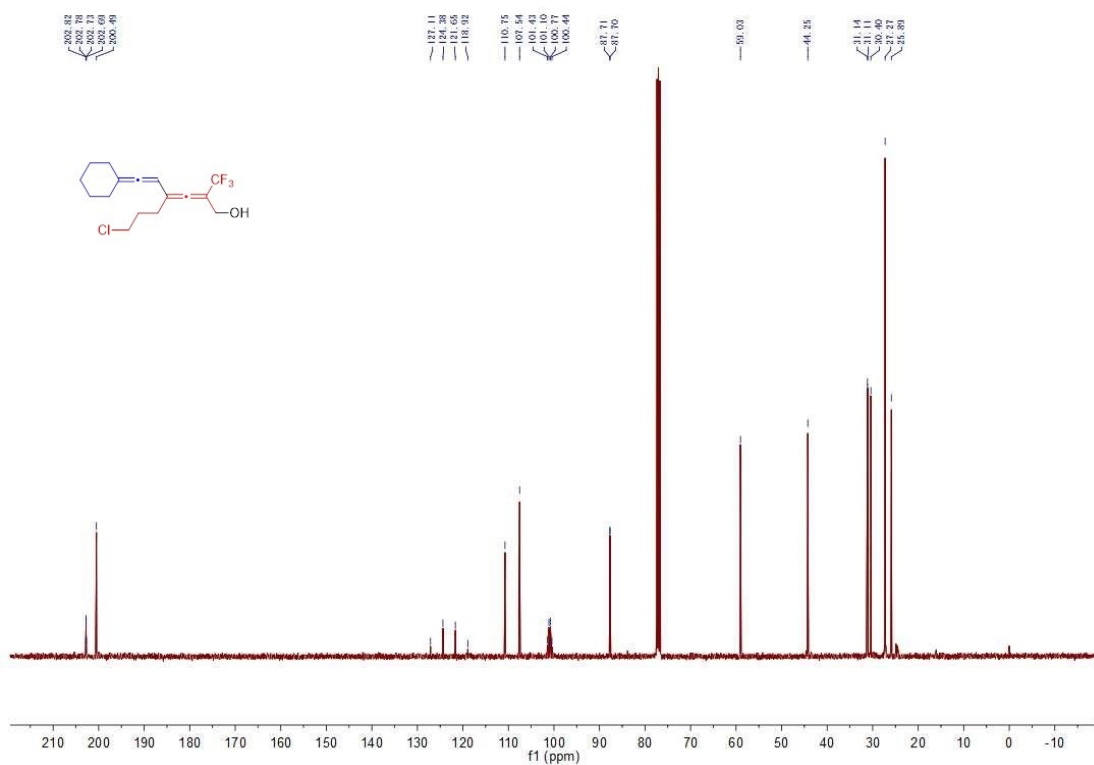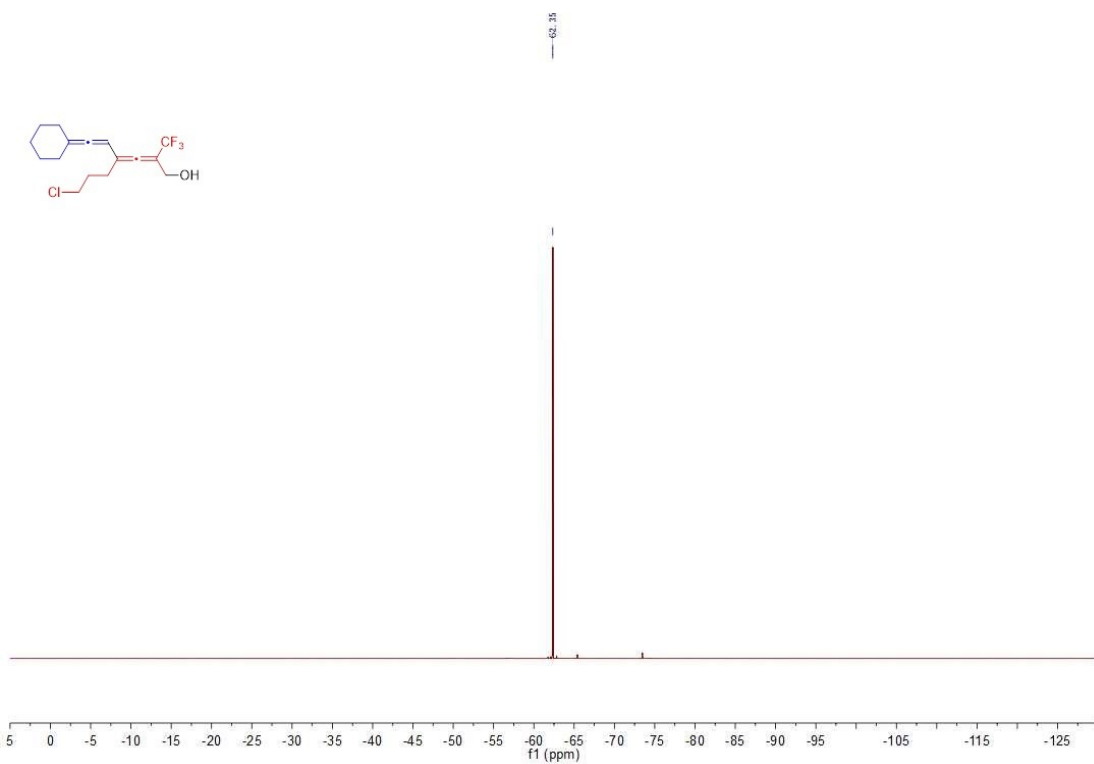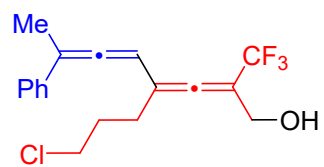

**4-(3-chloropropyl)-7-phenyl-2-(trifluoromethyl)octa-2,3,5,6-tetraen-1-ol (3sd)**

After isolated and purified procedure, this compound was obtained 18.1 mg (53% yield)

as colorless oil. (Petroleum ether : EtOAc = 5 : 1)

$^1\text{H}$  NMR (400 MHz,  $\text{CDCl}_3$ )  $\delta$  7.46-7.32 (m, 4H), 7.29-7.20 (m, 1H), 6.12-6.03 (m, 1H), 4.34 (s, 2H), 3.59-3.48 (m, 2H), 2.45-2.27 (m, 2H), 2.19 (d,  $J = 2.9$  Hz, 3H), 1.96-1.83 (m, 2H).

$^{13}\text{C}$  NMR (101 MHz,  $\text{CDCl}_3$ )  $\delta$  206.9, 203.2 (dq,  $J = 8.1, 4.1$  Hz), 135.6, 128.6, 127.5, 125.9, 123.0 (q,  $J = 274.8$  Hz), 110.0, 105.8, 101.5 (q,  $J = 33.2$  Hz), 92.2, 59.0, 43.9, 30.3, 27.2, 16.9.

$^{19}\text{F}$  NMR (376 MHz,  $\text{CDCl}_3$ )  $\delta$  -62.30, -62.32.

HRMS (ESI) calculated for  $\text{C}_{18}\text{H}_{19}\text{ClF}_3\text{O}^+$   $[\text{M}+\text{H}]^+$  343.1071; found 343.1075.

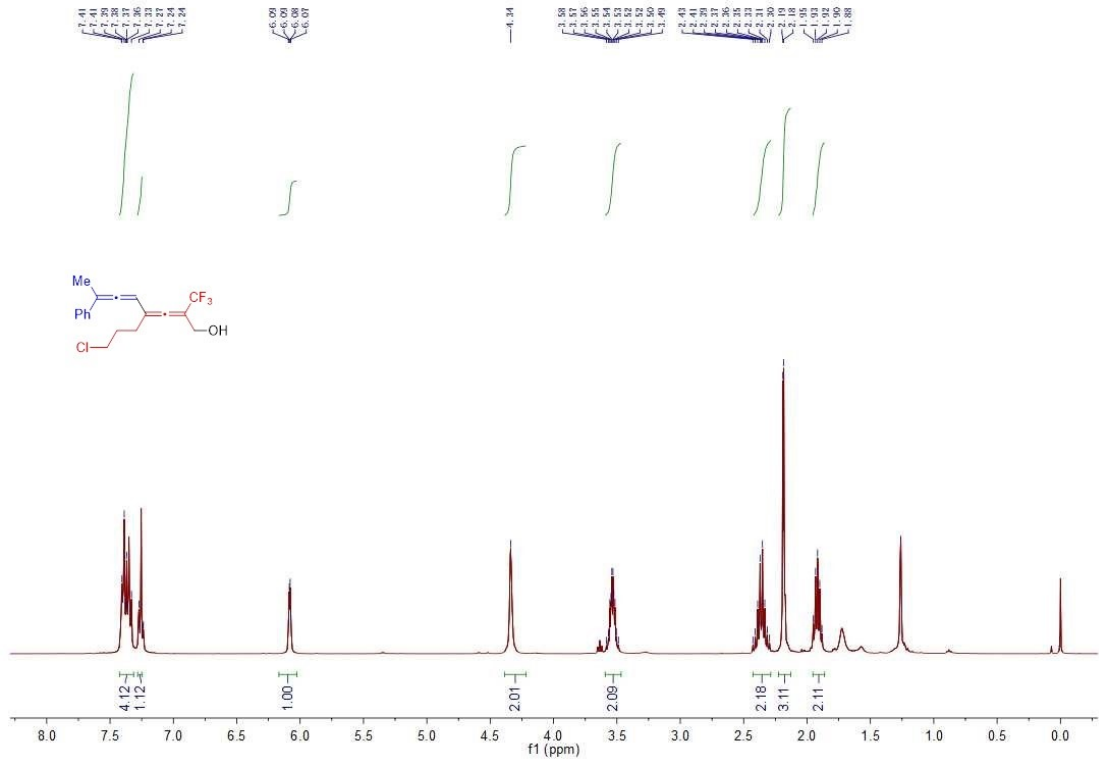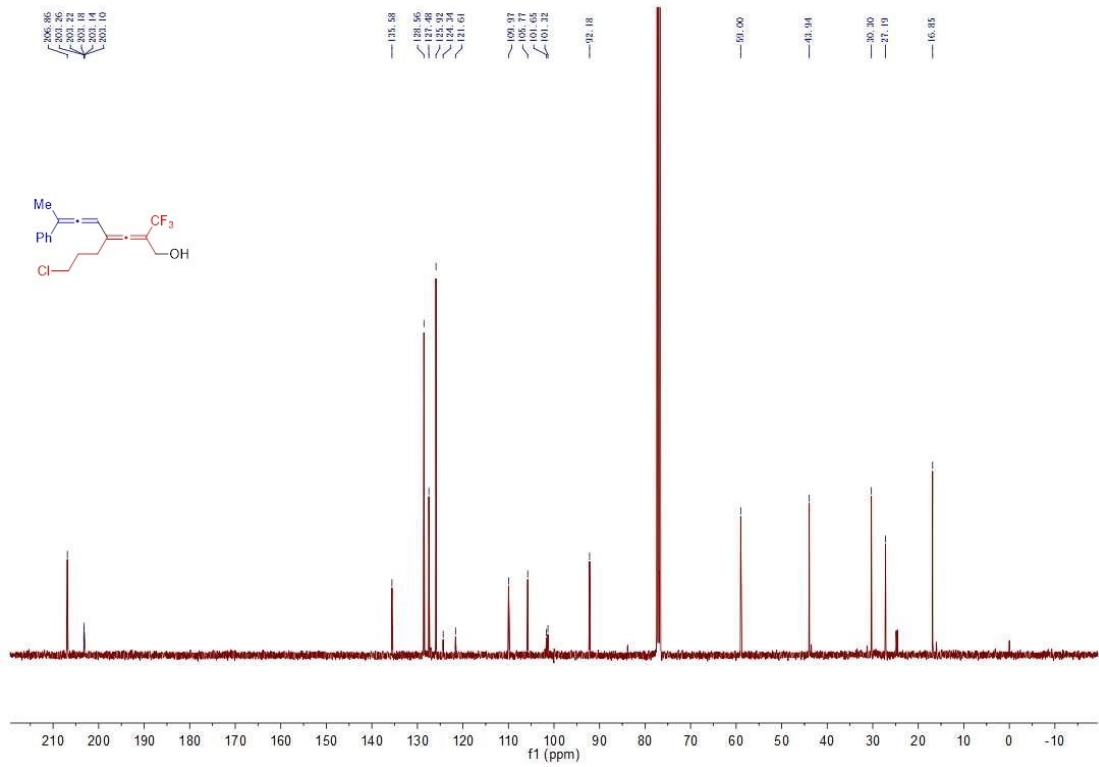



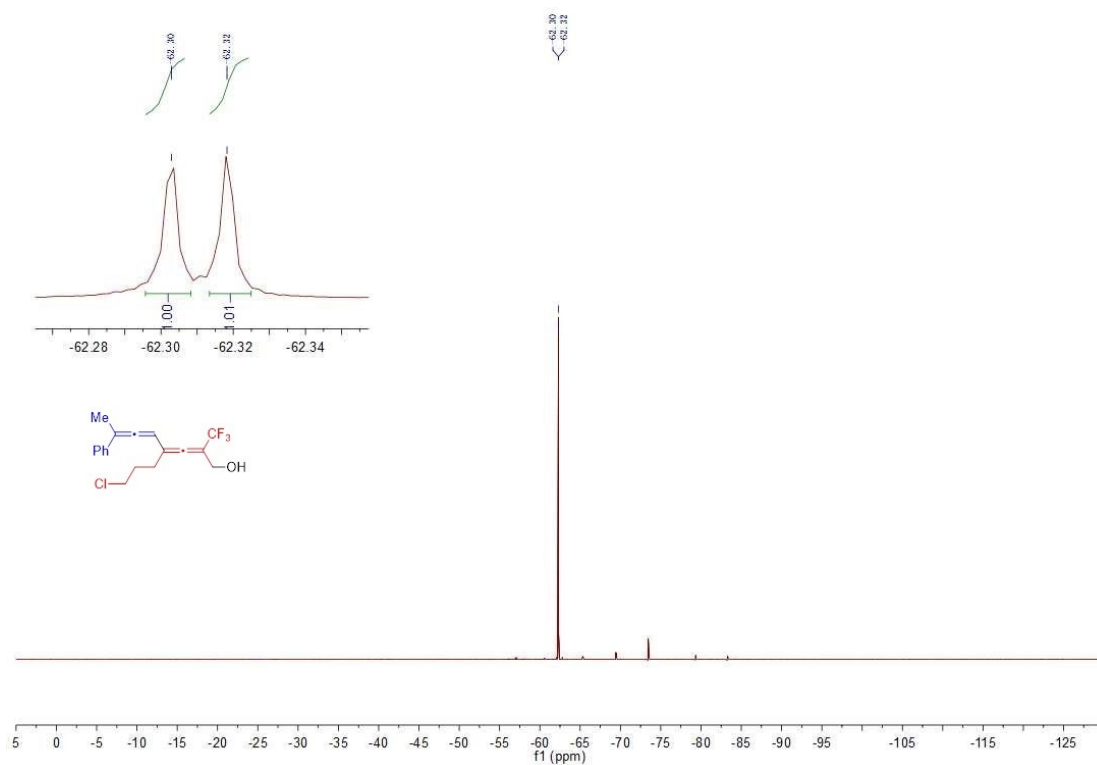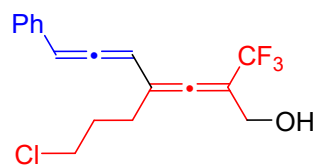

#### 4-(3-chloropropyl)-7-phenyl-2-(trifluoromethyl)hepta-2,3,5,6-tetraen-1-ol (3se)

After isolated and purified procedure, this compound was obtained 14.4 mg (44% yield) as colorless oil. (Petroleum ether : EtOAc = 5 : 1)

$^1\text{H}$  NMR (400 MHz,  $\text{CDCl}_3$ )  $\delta$  7.77-6.82 (m, 5H), 6.56 (d,  $J = 6.4$  Hz, 1H), 6.21 (d,  $J = 6.5$  Hz, 1H), 4.35 (d,  $J = 1.1$  Hz, 2H), 3.55 (t,  $J = 6.3$  Hz, 2H), 2.48-2.29 (m, 2H), 2.03-1.85 (m, 2H).

$^{13}\text{C}$  NMR (101 MHz,  $\text{CDCl}_3$ )  $\delta$  207.7, 203.2 (q,  $J = 4.2$  Hz), 132.8, 128.9, 127.8, 127.1, 122.9 (q,  $J = 274.8$  Hz), 109.2, 101.7 (q,  $J = 33.4$  Hz), 99.3, 94.3, 58.9, 43.9, 30.1, 27.01.

$^{19}\text{F}$  NMR (376 MHz,  $\text{CDCl}_3$ )  $\delta$  -62.29, -62.36.

HRMS (ESI) calculated for  $\text{C}_{17}\text{H}_{17}\text{ClF}_3\text{O}^+$   $[\text{M}+\text{H}]^+$  329.0915; found 329.0920.

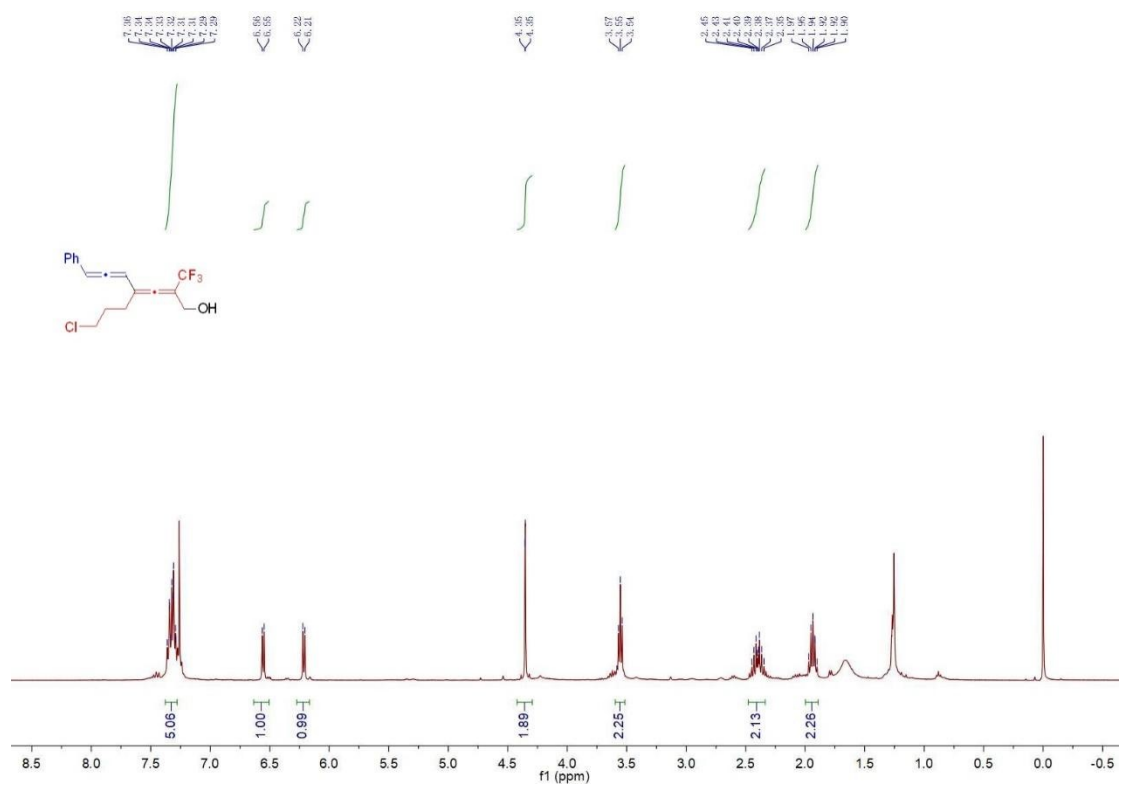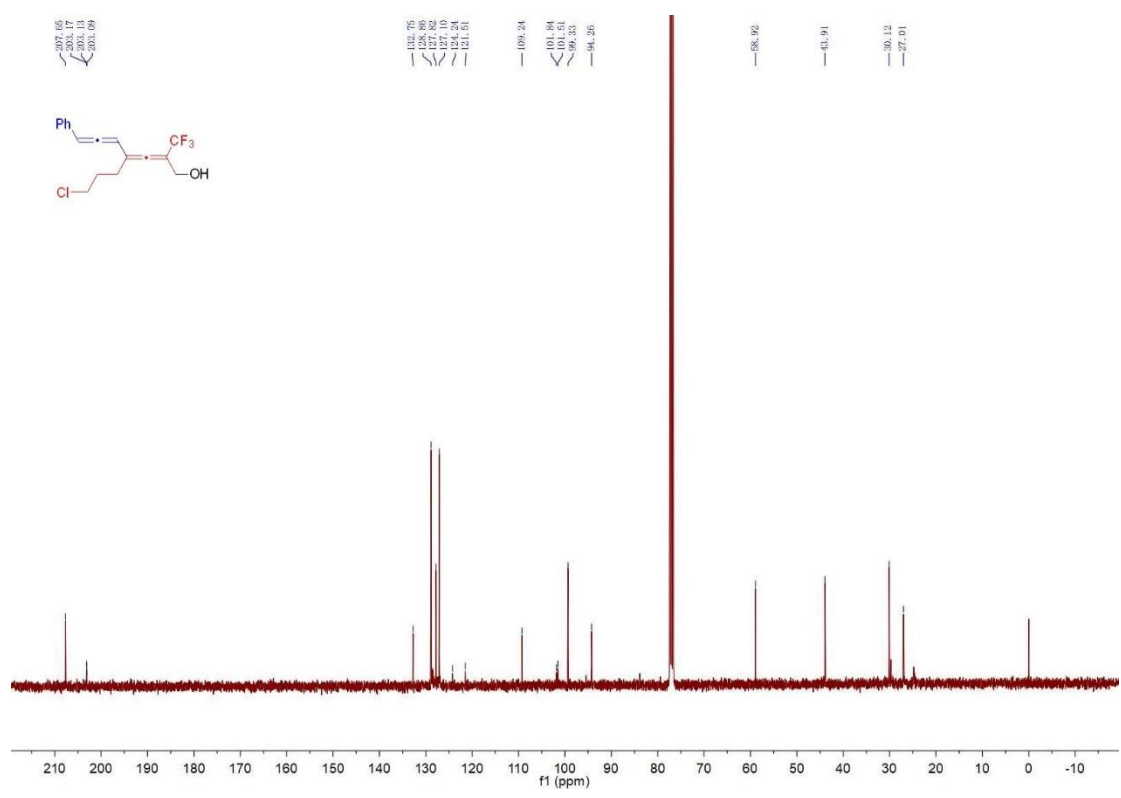

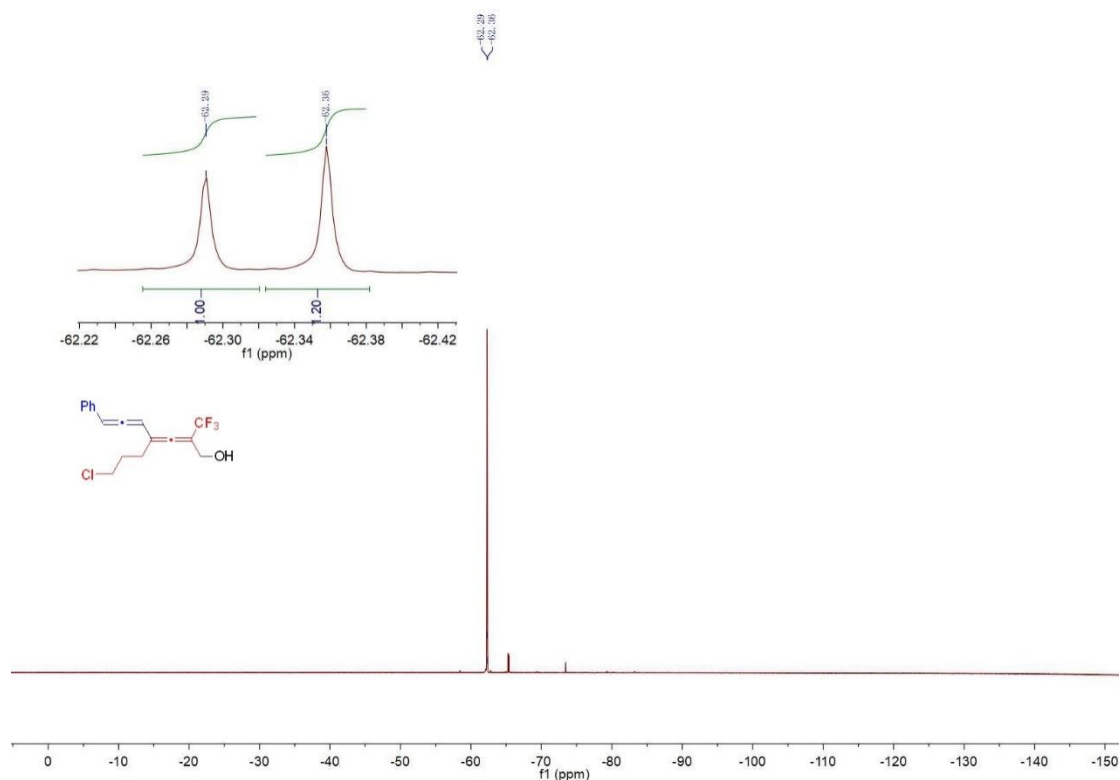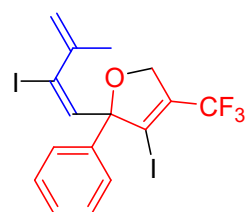

**(*E*)-3-iodo-2-(2-iodo-3-methylbuta-1,3-dien-1-yl)-2-phenyl-4-(trifluoromethyl)-2,5-dihydrofuran (4a)**

After isolated and purified procedure, this compound was obtained 32.4 mg (61% yield) as colorless oil. (Petroleum ether : EtOAc = 50 : 1)

$^1\text{H}$  NMR (400 MHz,  $\text{CDCl}_3$ )  $\delta$  7.45-7.32 (m, 5H), 6.69 (s, 1H), 4.88 (dd,  $J = 13.0, 1.2$  Hz, 1H), 4.84 (s, 1H), 4.73-4.72 (m, 1H), 4.70 (dd,  $J = 13.1, 1.2$  Hz, 1H), 1.89 (s, 3H).

$^{13}\text{C}$  NMR (101 MHz,  $\text{CDCl}_3$ )  $\delta$  147.2, 141.0, 138.6, 133.7 (q,  $J = 34.8$  Hz), 128.5, 126.6, 120.5 (q,  $J = 271.3$  Hz), 113.3, 107.2, 103.1 (q,  $J = 4.4$  Hz), 98.5, 74.6, 74.6, 21.5.

$^{19}\text{F}$  NMR (376 MHz,  $\text{CDCl}_3$ )  $\delta$  -62.05.

HRMS (ESI) calculated for  $\text{C}_{16}\text{H}_{14}\text{F}_3\text{I}_2\text{O}^+$   $[\text{M}+\text{H}]^+$  532.9081; found 532.9088.

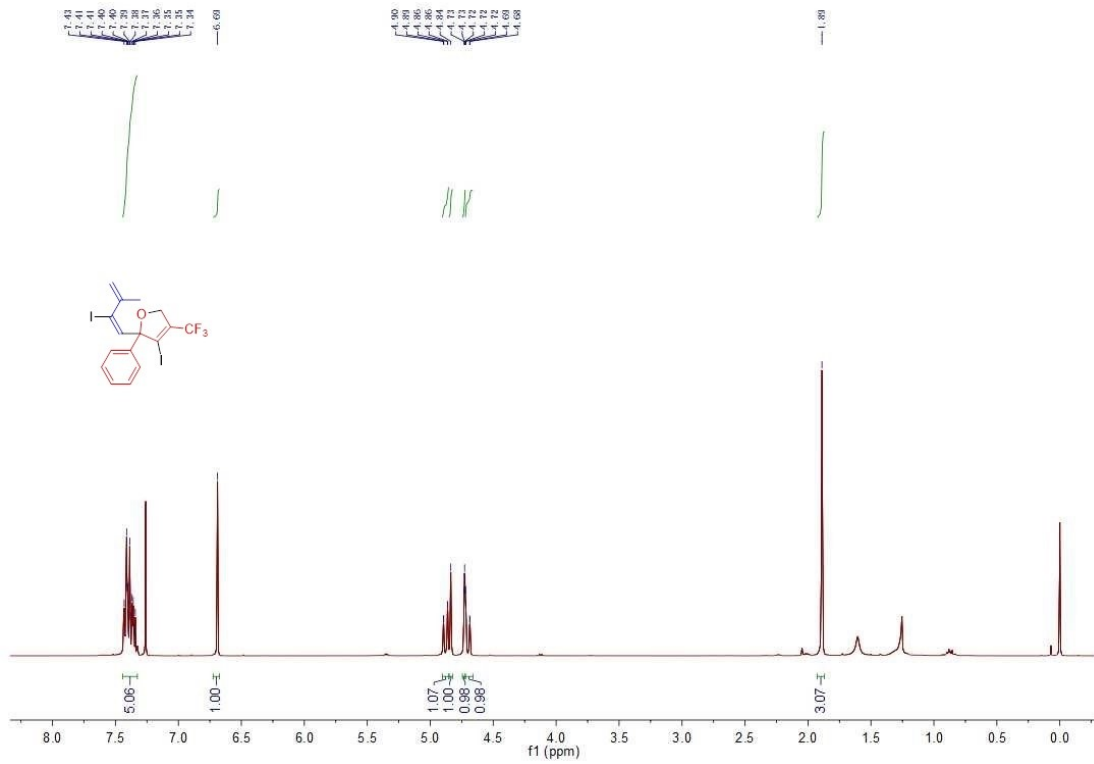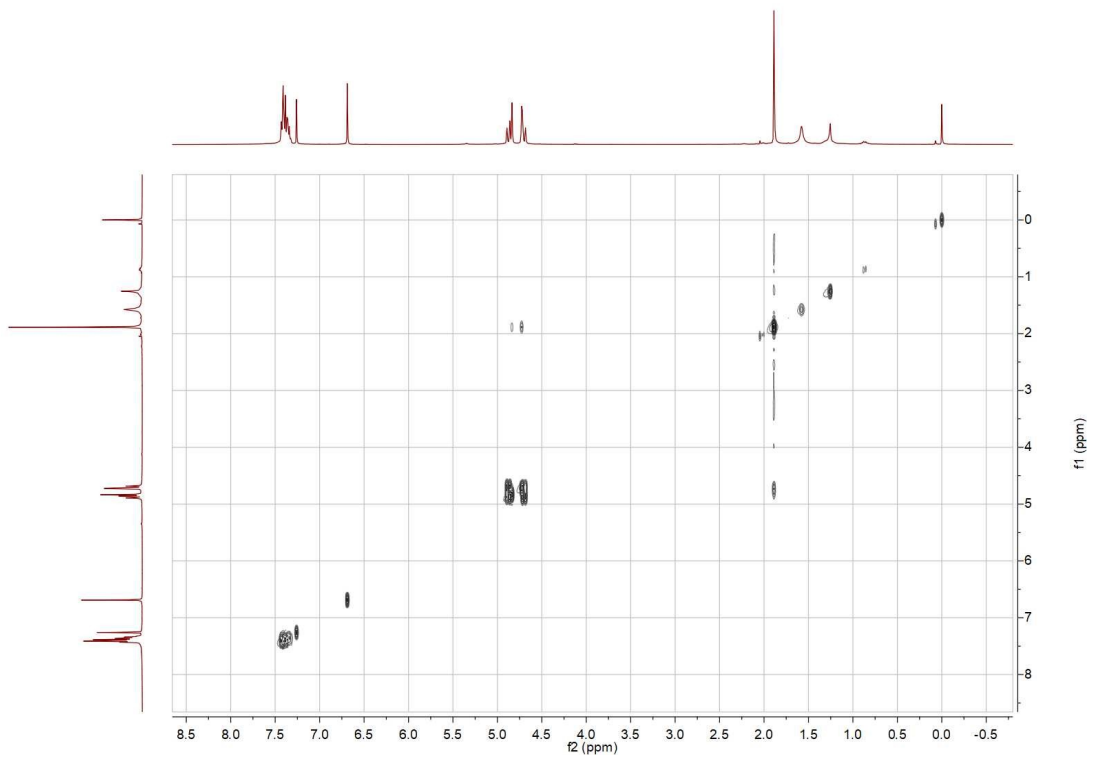

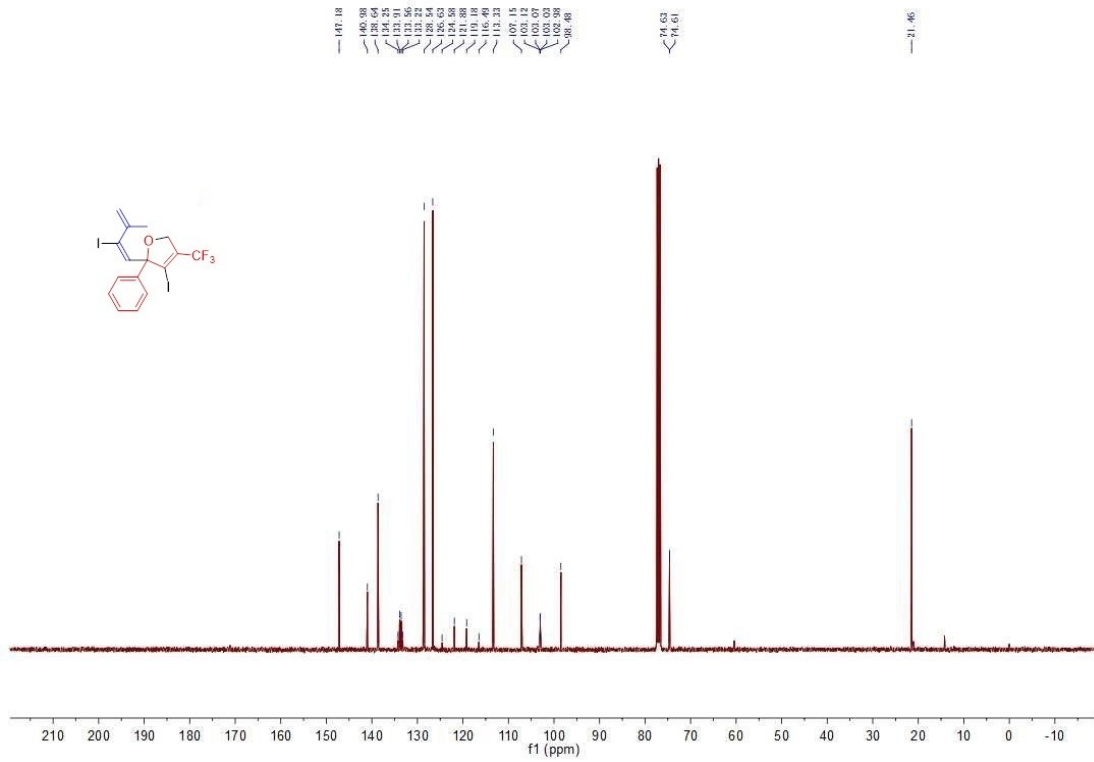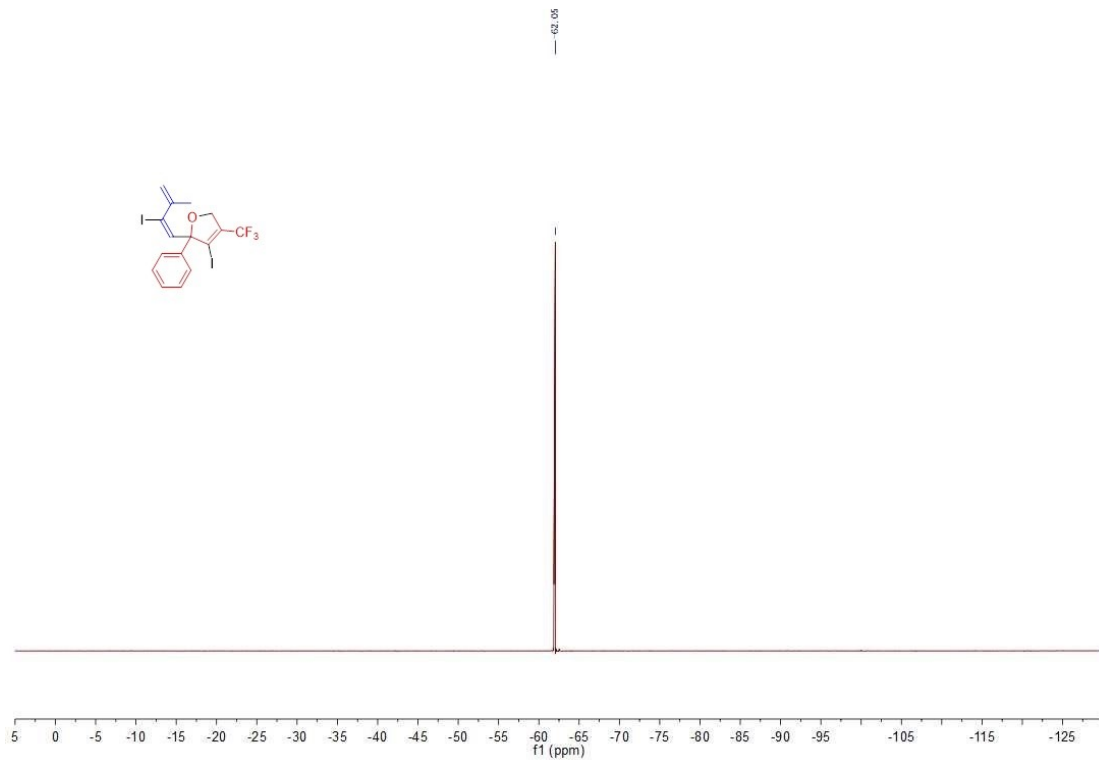

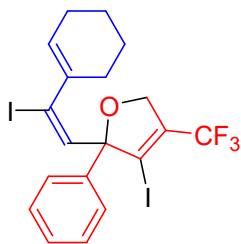

**(E)-2-(2-(cyclohex-1-en-1-yl)-2-iodovinyl)-3-iodo-2-phenyl-4-(trifluoromethyl)-2,5-dihydrofuran (4b)**

After isolated and purified procedure, this compound was obtained 37.7 mg (66% yield) as colorless oil. (Petroleum ether : EtOAc = 50 : 1)

$^1\text{H}$  NMR (400 MHz,  $\text{CDCl}_3$ )  $\delta$  7.46-7.40 (m, 2H), 7.38-7.30 (m, 3H), 6.61 (s, 1H), 5.72 (t,  $J = 3.7$  Hz, 1H), 4.82 (ddd,  $J = 44.0, 12.9, 1.0$  Hz, 2H), 2.31-2.15 (m, 1H), 1.99-1.91 (m, 1H), 1.87-1.75 (m, 2H), 1.59-1.14 (m, 4H).

$^{13}\text{C}$  NMR (101 MHz,  $\text{CDCl}_3$ )  $\delta$  141.0, 139.9, 138.8, 133.4 (q,  $J = 34.7$  Hz), 128.3, 128.3, 126.7, 126.5, 120.6 (q,  $J = 271.3$  Hz), 111.4, 104.0 (q,  $J = 4.3$  Hz), 100.0, 98.1, 74.5, 27.4, 25.0, 22.0, 21.4.

$^{19}\text{F}$  NMR (376 MHz,  $\text{CDCl}_3$ )  $\delta$  -61.79.

HRMS (ESI) calculated for  $\text{C}_{19}\text{H}_{18}\text{F}_3\text{I}_2\text{O}^+$   $[\text{M}+\text{H}]^+$  572.9394; found 572.9391.

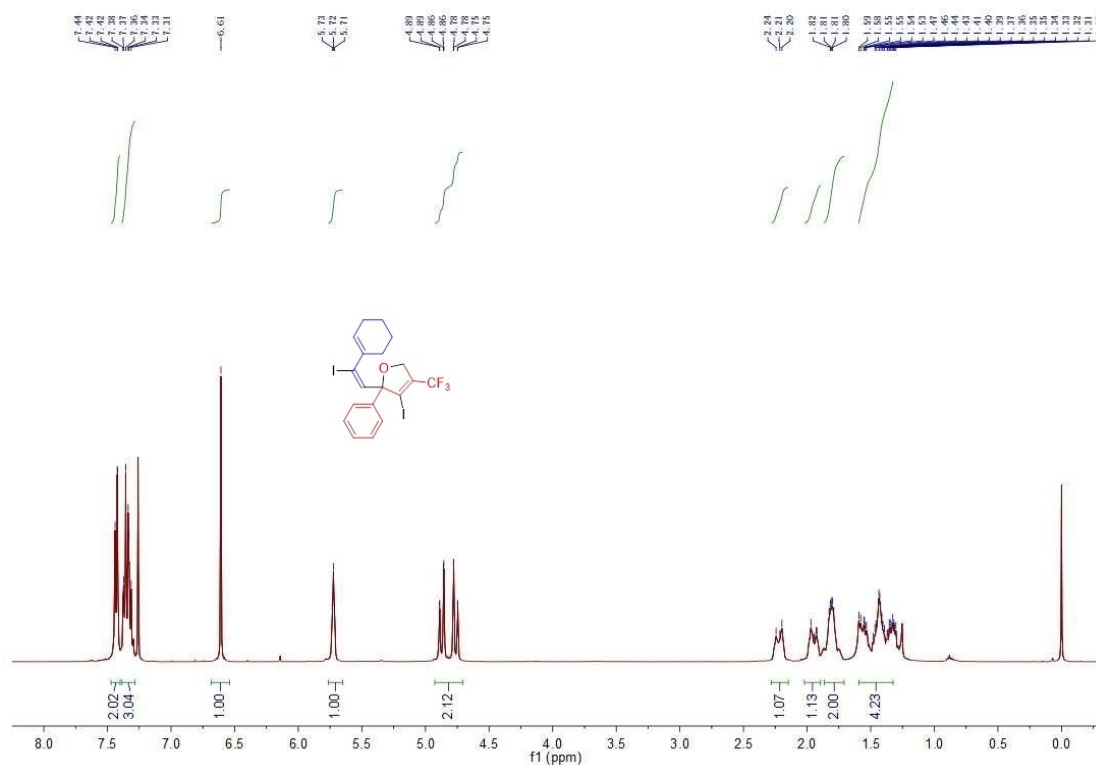

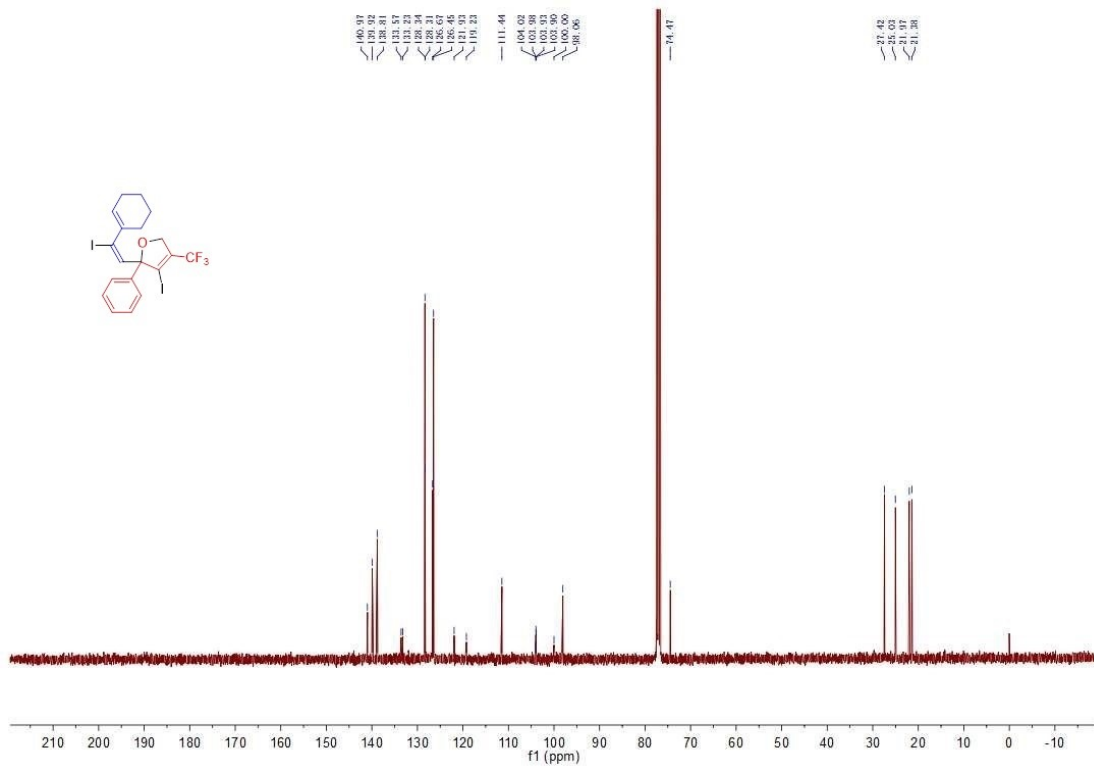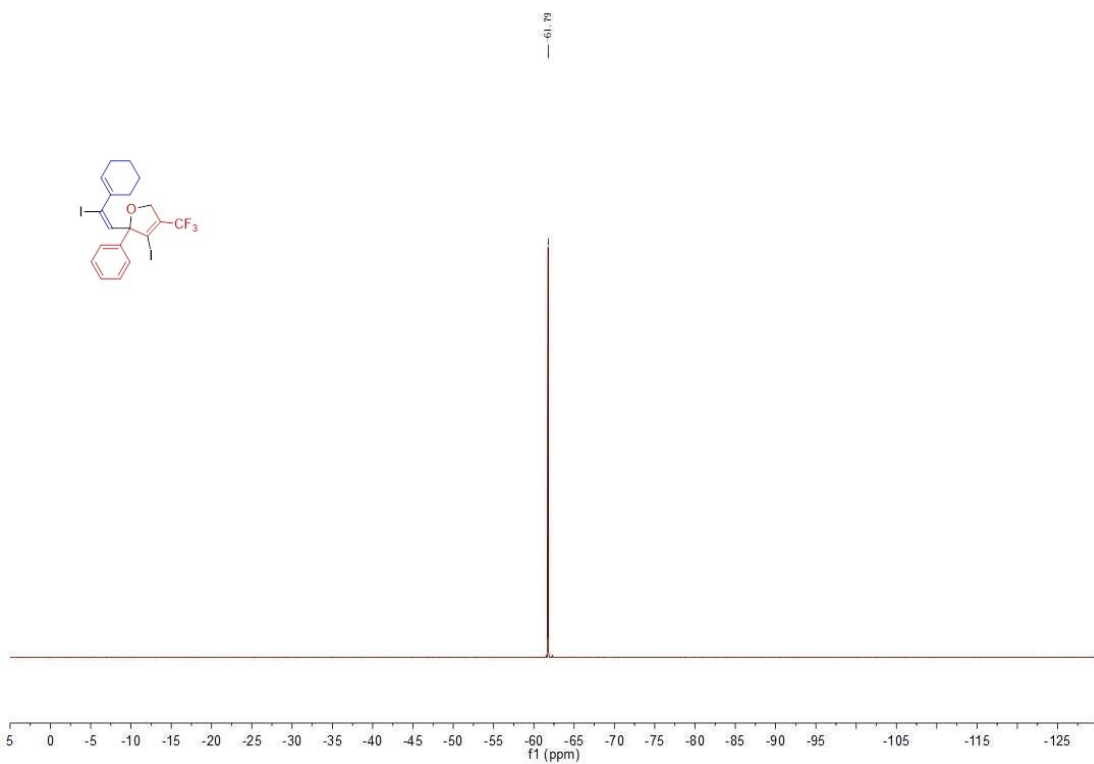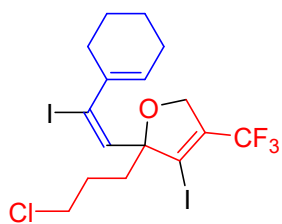

**(E)-2-(3-chloropropyl)-2-(2-(cyclohex-1-en-1-yl)-2-iodovinyl)-3-iodo-4-(trifluoromethyl)-2,5-dihydrofuran (4c)**

After isolated and purified procedure, this compound was obtained 33.1 mg (58% yield) as colorless oil. (Petroleum ether : EtOAc = 50 : 1)

$^1\text{H}$  NMR (400 MHz,  $\text{CDCl}_3$ )  $\delta$  6.17 (s, 1H), 5.80-5.33 (m, 1H), 4.60 (ddd,  $J = 33.0, 12.8, 1.2$  Hz, 2H), 3.55 (t,  $J = 6.2$  Hz, 2H), 2.40-2.25 (m, 1H), 2.18-2.04 (m, 1H), 1.99-1.85 (m, 4H), 1.83-1.76 (m, 1H), 1.80-1.46 (m, 5H).

$^{13}\text{C}$  NMR (101 MHz,  $\text{CDCl}_3$ )  $\delta$  141.0, 139.4, 133.0 (q,  $J = 34.7$  Hz), 124.8, 120.5 (q,  $J = 271.3$  Hz), 109.9, 101.4 (q,  $J = 4.6$  Hz), 97.9, 74.8, 44.7, 37.1, 27.1, 25.9, 25.0, 22.1, 21.6.

$^{19}\text{F}$  NMR (376 MHz,  $\text{CDCl}_3$ )  $\delta$  -61.92.

HRMS (ESI) calculated for  $\text{C}_{16}\text{H}_{19}\text{ClF}_3\text{I}_2\text{O}^+$   $[\text{M}+\text{H}]^+$  572.9160; found 572.9166.

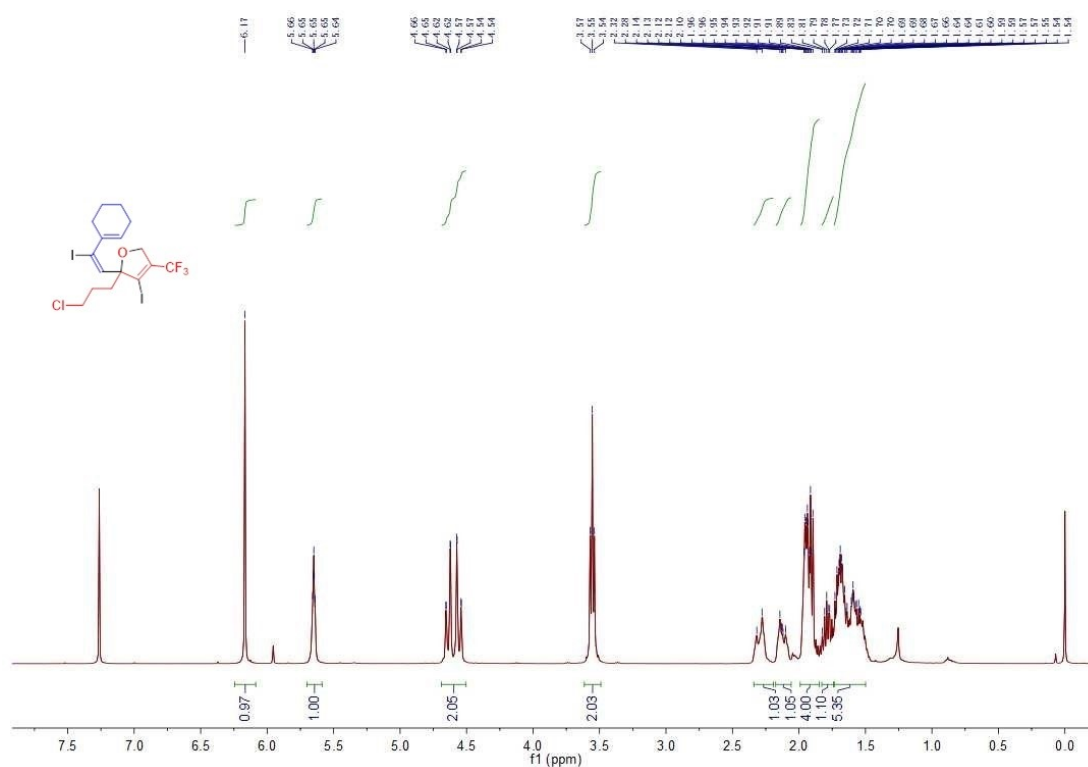



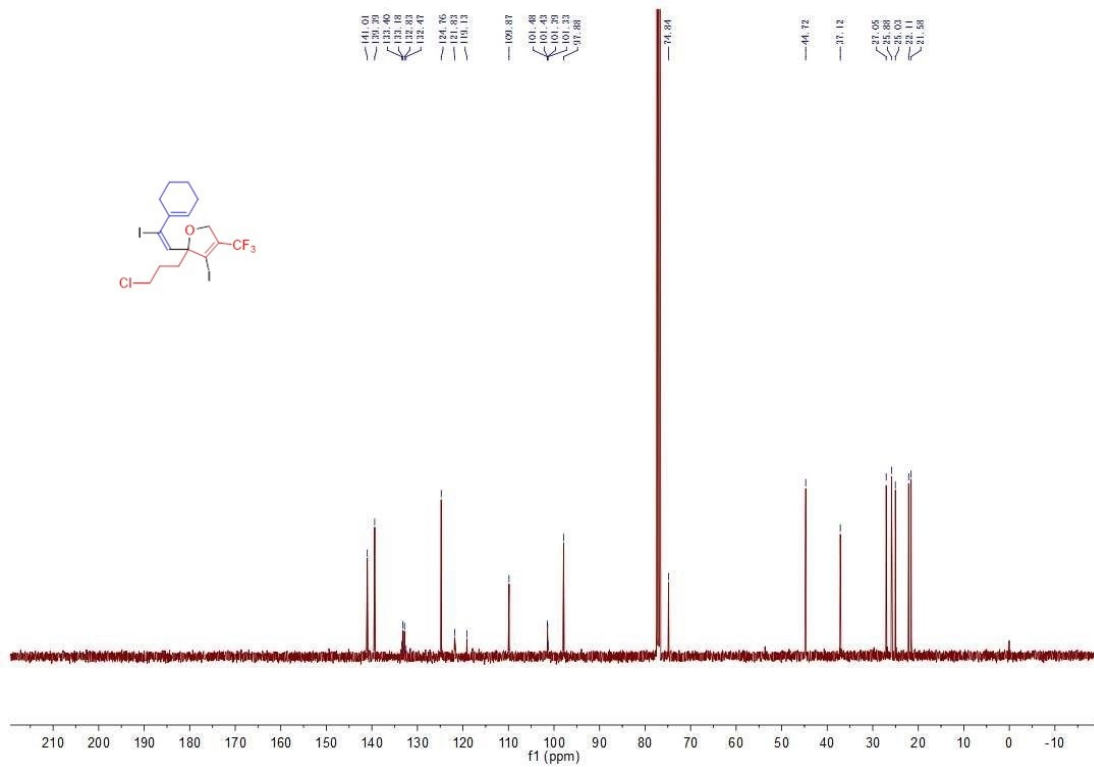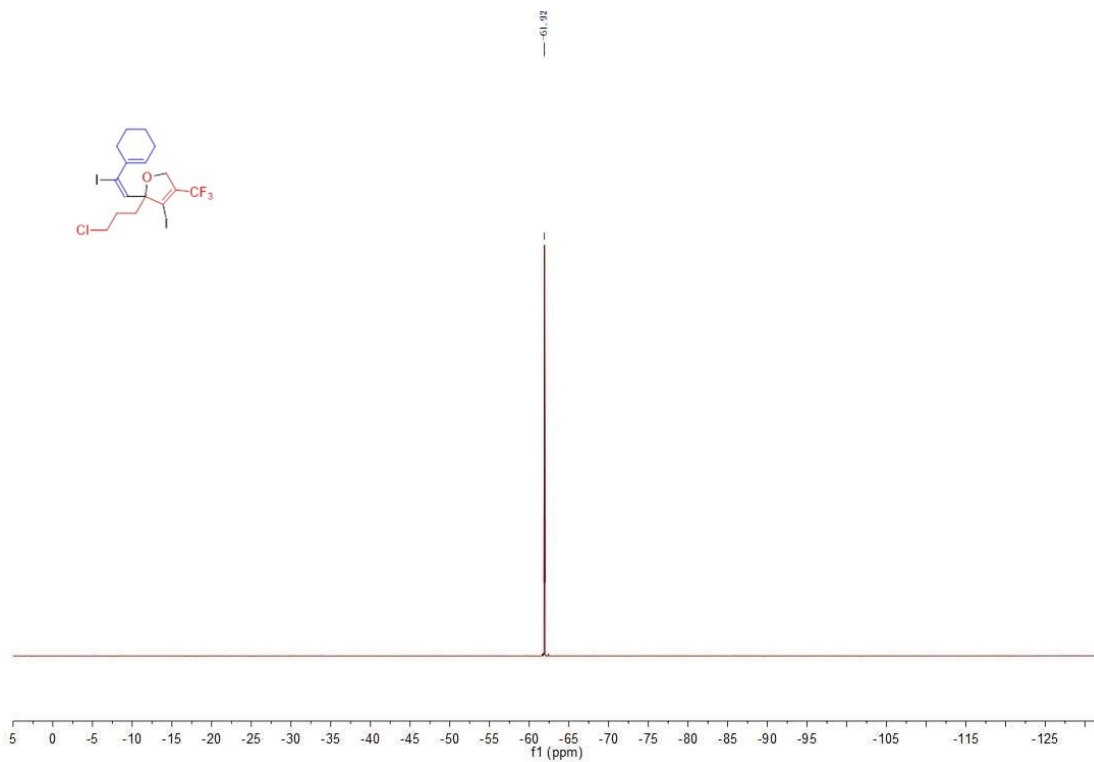

## References

1. Hu, C.-M.; Hong, F.; Xu, Y.-Y. *J. Fluor. Chem.* **1993**, *64*, 1-4.
2. Waser, J.; González-Gómez, J. C.; Nambu, H.; Huber, P.; Carreira, E. M. *Org. Lett.* **2005**, *7*, 4249-4252.
3. Pünner, F.; Hilt, G. *Chem. Commun.* **2012**, *48*, 3617-3619.
4. Zatochnaya, O. V.; Gevorgyan, V. *Org. Lett.* **2013**, *15*, 2562-2565.
